# Supplementary material for: Genome-wide identification and characterization of TCP family genes in Brassica juncea var. tumida
Source: PeerJ journal article supplement (doi:10.7717/peerj.9130), 2020-05-14

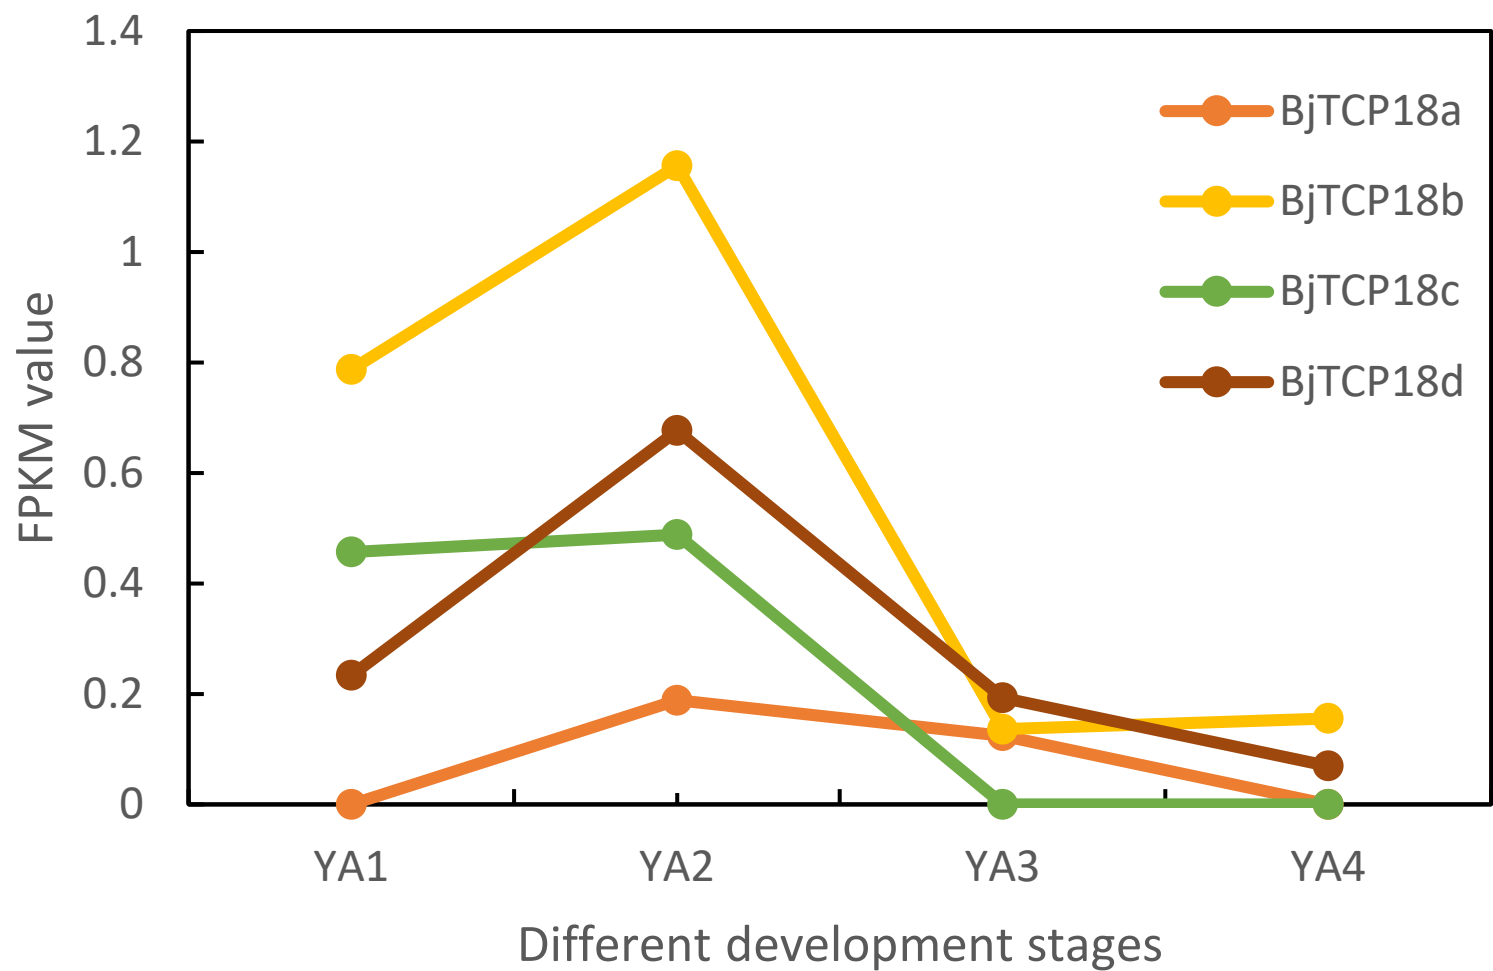

Supplement: Figure_S3.pdf [file Figure_S3.pdf]
