# Supplementary material for: Genome-wide identification and characterization of TCP family genes in Brassica juncea var. tumida
Source: PeerJ journal article supplement (doi:10.7717/peerj.9130), 2020-05-14
Supplement: FS1new.pdf [file FS1new.pdf]

BjTCP19 .....MESNL  
 AtTCP19 .....MESNH  
 BjTCP9a .....MATIKKH  
 BjTCP9c .....MATIKTH  
 BjTCP9b .....MATIKHH  
 BjTCP9d .....MATIKKH  
 AtTCP9 .....MATIQKL  
 AtTCP11 .....  
 BjTCP21b .....  
 BjTCP21d .....  
 BjTCP21a .....  
 BjTCP21e .....  
 BjTCP21c .....  
 BjTCP21f .....  
 AtTCP21 .....  
 BjTCP7a .....  
 BjTCP7e .....  
 BjTCP7b .....  
 BjTCP7d .....  
 BjTCP7c .....  
 AtTCP7 .....  
 BjTCP22a .....  
 BjTCP22c .....  
 AtTCP22 .....  
 BjTCP22b .....  
 BjTCP22d .....  
 AtTCP23 .....  
 BjTCP8a .....  
 BjTCP8b .....  
 AtTCP8 .....  
 BjTCP15a .....  
 BjTCP15d .....  
 BjTCP15c .....  
 BjTCP15e .....  
 BjTCP15b .....  
 BjTCP15f .....  
 AtTCP15 .....  
 BjTCP14a .....  
 BjTCP14b .....MDGGDNVGGGGG  
 AtTCP14 .....MQKPTSSILNVIMDGGDSVGGG  
 BjTCP20a .....  
 BjTCP20c .....  
 AtTCP20 .....  
 BjTCP20b .....  
 BjTCP6 .....  
 AtTCP6 .....  
 BjTCP1a .....MSSSNNDYNGG.NSGVYPLSLYLSSLPGHOGIIRNPYN.....  
 BjTCP1e .....SNNDYNGG.NNGVYPLSLYLSSLPGQGGIICNPYN.....  
 BjTCP1b .....MSSSNNDYING.NNGVYPLSLYLSPLAGHODIIRNPYN.....  
 BjTCP1c .....MSSFNNDYNGG.NNGVYPLSLYLSPLAGHODIIRNPYN.....  
 BjTCP1d .....MSSYNNYNGSNGVYPLSLYLSSLSGHODIIRNPYN.....  
 AtTCP1 .....MSSSTNDYNDGNNVYPLSLYLSSLSGHODIIRNPYN.....  
 BjTCP12a .....MFPSIDTNGYDLDFPFNLHEATMLPSFTTHILSPSS.....  
 BjTCP12b .....MFPSIDTNGYDLDFPFNLHEATMLPSFTTHIQCPSS.....  
 AtTCP12 .....MFPSLDTNGYDLDFPFIPHQTTFPSFTTHIQSPNS.....  
 BjTCP18a .....MNNRSFSTTTTISEDYMLFPYNDHYSSQPLLFPNCPSSINDLLIHSNSNISN.....  
 BjTCP18d .....MNDNKTFSTTTTINDDYMLFPYDDHYSSQPLLFPSPCSSINDLLIHSNSNTNN.....  
 BjTCP18b .....MNNNKTFSTTTSTINEDYMSFPYNDNYCSQPLLFPSPSSINDLLIHSNSNTSNN.....  
 BjTCP18c .....MNNNKTFSTTTSTINEDYMSFPYNDNYCSQPLLFPSPSSINDLLIHSNSNTSNN.....  
 AtTCP18 .....MNNNIFSTTTTINDDYMLFPYNDHYSSQPLLFPSPSSINDLLIHSTNTSNN.....  
 BjTCP17a .....  
 BjTCP17b .....MRTN.....  
 AtTCP17 .....  
 BjTCP5c .....MRSREYDDEETQAKQERDHN.HNNQVNLNN.....  
 BjTCP5a .....M.....  
 BjTCP5b .....MRSKECDEEEIQAKQEGDHDNDHNNHQNVLN.....  
 AtTCP5 .....MRSGECEDEEIQAKQERDQ.NQNHNVLN.....  
 BjTCP13a .....MDTGPWKDNDVSGQTRTR.HEEAV.....  
 BjTCP13c .....MDTVHWKDTNDVSGQTRTR.HEEAV.....  
 BjTCP13b .....MTVQTQELNITSIMNTGPWRDANDVSGGTRRRNGEVEEDSEEA.....  
 AtTCP13 .....MNI VSWKDANDEVAGGATRRREVEKEDQE.....  
 BjTCP24a .....MEVDD.....  
 BjTCP24b .....MEVDD.....  
 BjTCP24c .....MEDDDHTETQOOOQOOOQOOO.....  
 BjTCP24d .....EKHESSVSMEEDDDI.....  
 AtTCP24 .....MEVDEDI.....  
 BjTCP2a .....  
 BjTCP2d .....  
 BjTCP2b .....  
 BjTCP2c .....  
 AtTCP2 .....  
 BjTCP3 .....  
 AtTCP3 .....MAPDN.....  
 AtTCP4 .....M.....  
 AtTCP16 .....  
 AtTCP10 .....

BjTCP19 EG.....KEAMAHLSDPDPETNRGMLLKQEDDDPNKQ.....  
 AtTCP19 EGNA.....IQVIDQVTMTHLSDPNPKTKPGMMLMKQEDG.....  
 BjTCP9a EAER.....LRAVDLSIIDGVRVSVETSKPFQVANTVSLDPKAEPL.....  
 BjTCP9c EAER.....LRAVDPSLINGVRSVETSKPSEVANTVSLDPKAEPS.....  
 BjTCP9b EDER.....LRAVDLTSKP.....FEVNN.AVSLPEKTEPSLESS.....  
 BjTCP9d EGER.....LRAVDLSVQT.....FEVNNNAVSLPEKTEPSLESS.....  
 AtTCP9 EEVAGKQDQLRAVDLTIINGVRNVETSRPFQVNPTVSLPEKAEP.....  
 AtTCP11 .....MIFQNVCRNESNFNAIASERSQTO.....  
 BjTCP21b .....MENSDDGA.....  
 BjTCP21d .....MENNDGA.....  
 BjTCP21a .....MTSNDGS.....  
 BjTCP21e .....MTSNDGGG.....  
 BjTCP21c .....MSNDDGT.....  
 BjTCP21f .....MSNDDGT.....  
 AtTCP21 .....MADNDGA.....  
 BjTCP7a .....MSNNDGVMISNGSLIEH.....  
 BjTCP7e .....MSNNNDGVMISNGSLMEH.....  
 BjTCP7b .....  
 BjTCP7d .....  
 BjTCP7c .....  
 AtTCP7 .....MSINNNNNNNNN.....  
 BjTCP22a .....MDQNSHDR.PTAAEAGLQLNSTENPSPGRSVHFAGG.....  
 BjTCP22c .....MDQNSHDRPAAAEAGLQLNSTENPSPGRSVFPAS.....  
 AtTCP22 .....MNQNSSVAEATLQLNSGKPKSPGSIPIFISSG.....  
 BjTCP22b .....METRTAAEEASLQLNSTENPSPGG.....  
 BjTCP22d .....METRTAAEEASLQLNSTENQSPGG.....  
 AtTCP23 .....MESHNNNQSNNTTGSAAHLVPSMGPISGSVS.....  
 BjTCP8a .....MDLSDD.....GAAARGGSRHLVDPVSLVPRSTP.....  
 BjTCP8b .....MDLSDD.....GAAARGGSRHLVDPVSLVPRSTP.....  
 AtTCP8 .....MDLSDIRNNNDTAAVATGGGARQLVDASLSVPRSTP.....  
 BjTCP15a .....MDPDPDHNPNNHRPNFPLQLLDSSSSSSTSLAIVPSASSS.....  
 BjTCP15d .....MDHNPNNHRPNFPLQLLDSS.....TSFATIPVPSASSS.....  
 BjTCP15c .....MDPDPDHNPNNHRPNFPLQLLDSSSSSSTSLAIVPSASSS.....  
 BjTCP15e .....MDPDPDHNPNNHRPNFPLQLLDSSSSSSTSLAIVPSASSS.....  
 BjTCP15b .....MDPDPDHNPNNHRPNFPLQLLDSSSSSSTSLAIVPSASSS.....  
 BjTCP15f .....MDPDPDHNPNNHRPNFPLQLLDSSSSSSTSLAIVPSASSS.....  
 AtTCP15 .....MDPDPDHNPNNHRPNFPLQLLDSSSSTSSSSTSLAIVSSTTS.....  
 BjTCP14a .....  
 BjTCP14b GDDHNNHLLHHHRPTFFPQLLGKRDPPDNNQQQQPSPSSSSSLFSLHQHQ.....  
 AtTCP14 GDDHNNHLLHHHRPTFFPQLLGKHDPDNNHQQQPSPSSSSSLFSLHQHQQL.....  
 BjTCP20a .....MDPKNPNRRHQVNFPLNPPPRNQSLGDASKDDK.....  
 BjTCP20c .....MDPKNPNRRHQVNFPLNPPPRNQSLGDASKD.....  
 AtTCP20 .....MDPKNPNRRHQVNFPLNPPPRNQSLGDASKD.....  
 BjTCP20b .....MDPKNPNRRHQVNFPLNPPPRNQSLGDASKD.....  
 BjTCP6 .....PNNLNPSE.....  
 AtTCP6 .....MVMPEKKNQNLPSFLNPSRQNDNDK.....  
 BjTCP1a .....HQSTASPGQMVSAVPESELIDYMSFNNSAVNQK.....  
 BjTCP1e .....HQSTASPGQMVSAVPESELIDYMSFNNSAVNQK.....  
 BjTCP1b .....HQPTSPSGQMVSAVPESELINYMFSFNNSAVNQK.....  
 BjTCP1c .....HQPTSPSGQMVSAVPESELINYMFSFNNSAVNQK.....  
 BjTCP1d .....HQSTAYPGQMVSAVPESELINYMFSFNNSAVNQK.....  
 AtTCP1 .....HQKASPGHVMVAVPESELIDYMAFKSNNVNVNQ.....  
 BjTCP12a .....HHHYPPFSS.....SDFLD.....ESVLISQFLLOQQ.....ADVDSF.....  
 BjTCP12b .....HHHYPLPSFPFSSDFLD.....ESVLISQFLLOQQ.....DDDNPS.....  
 AtTCP12 .....HHHYSPPSFPFSSDFLESFDESFLINQFLLOQQDVAANVVESE.....  
 BjTCP18a .....PLD.....HHYQFLQAPSSFSQFVFVDFALVASFLPONNGHNDNQITITNDHNNHHHH.....  
 BjTCP18d .....LLDHHHHHHHHQFLQTPSCFSHFESVQDFALLASFLPONNGHNDNQITIN.....NSHHH.....  
 BjTCP18b .....HLD.....HHHQFLQAPSSFSQFVFVDFALLASFLPONIAHNDNQITIN.....DHH.....  
 BjTCP18c .....HLD.....HHHQFLQAPSSFSQFVFVDFALLASFLPONIGHNDNQITIN.....DHH.....  
 AtTCP18 .....HLD.....HHHQFLQAPSSFSQFVFVDFALLASFLPONIGHNDNQITIN.....DHH.....  
 BjTCP17a .....BjTCP17b .....MGIKQEGDNQYQATSLSSLRQ.....  
 AtTCP17 .....SMGIKQEGDNLYQTTSLSSLRQ.....  
 BjTCP5c .....MGPKEGDNLYQTTSLSSLRQ.....  
 BjTCP5a .....HVPAAESASPAPASRQWASAFR.....  
 BjTCP5b .....NMLQQQQQPVSRRQWTSAFR.....  
 AtTCP5 .....HMLQQQQPSSVSSRRQWTSAFR.....  
 BjTCP13a .....EAVATTKRPATISSSSSWMKSK.....  
 BjTCP13c .....VAVATTKRPASTSSSSSWMKSK.....  
 AtTCP13 .....VVVAVATSGKPKVKKKPTSSSSSSSWMKSK.....  
 BjTCP24a .....ETEVRATSGKPKVKKKPTSSSSSSSWMKSK.....  
 BjTCP24b .....DIDAQQQTSRKLQRISDNDNRNEMRDWNNP.....  
 BjTCP24c .....DIDAQQQTSRKLQRISDNDNRNEMRDWNNP.....  
 BjTCP24d .....QOQQQQQTSRKLQRISDNDNRNEMRDWNNP.....  
 AtTCP24 .....ETQQEQQSRKLQRISDNDNRNEMRDWNNP.....  
 BjTCP2a .....ELQKHQEQSRKLQRIFSE.DNTGLMRNWNPN.....  
 BjTCP2d .....  
 BjTCP2b .....  
 BjTCP2c .....  
 AtTCP2 .....MIGDLMKNNNGDVVDNEVNNRSLRWHHN.....  
 BjTCP3 .....  
 AtTCP3 .....DHFLDSPSPPLLEMRHHQSATENGGGCGEIV.....  
 AtTCP4 .....SDDQFHPPPPSSMRHRSTSDAADGGGCGEIV.....  
 AtTCP16 .....  
 AtTCP10 .....MGLKGYSVGEGGGEIVEVQGG.....

BjTCP19 .....QEVGFLOQVPTAPKR.....PFSKDRH  
AtTCP19 .....YLQPVKTKPAPKR.....PTSKDRH  
BjTCP9a .....LEVPSISMALAPPSSSIGPPLKR.ASTKDRH  
BjTCP9c .....LEVPSISMALAPPSSSIGPPLKR.ASTKDRH  
BjTCP9b .....LQVPSTSMALAPPSSSIGPPLKR.ASTKDRH  
BjTCP9d .....PSLSVSMALAPPSSSSTMRPPLKR.ASTKDRH  
AtTCP9 .....VMPFSMALAPPSSSTG.PPLKR.ASTKDRH  
AtTCP11 .....FGVSKSSSSGGGICIS.....ARTKDRH  
BjTCP21b .....MTNGVIVEHTSATNNKGPLNAVKKPPTKDRH  
BjTCP21d .....MTNGVIVEHTSATNNKGPLNAVKKPPTKDRH  
BjTCP21a .....VPNGVIVEHLS.AVNKGTLNAVKKPPTKDRH  
BjTCP21e .....VPNGVIVEHTSATNNKGPLNAVKKPPTKDRH  
BjTCP21c .....VTN.GAIVEHTSAANKGTLNAVKKPPTKDRH  
BjTCP21f .....VTTNGAIVEHLS.....KGTNAVKKPPTKDRH  
AtTCP21 .....VSNGIIVEHTSATNNKGPLNAVKKPPTKDRH  
BjTCP7a .....QRQQQQQQQNLKQSSDGDALVVKKPPAKDRH  
BjTCP7e .....QRQQQQQQQNLKQSSDGDALVVKKPPAKDRH  
BjTCP7b .....MSNNNDGALVVKKPPAKDRH  
BjTCP7d .....MSNSNDGALAVKKPPAKDRH  
BjTCP7c .....MSNSNDGALAVKKPPAKDRH  
AtTCP7 .....NNDGLMISSNGALIEQQPSVVVKKPPTKDRH  
BjTCP22a .....AT.....SSSTSTSSGTALAVVKKPAVKK.PSKDRH  
BjTCP22c .....SSSTSTSSGTALAVVKKPAVKK.PSKDRH  
AtTCP22 .....QHGN.....ISTATSSTSSGTALAVVKKPAVKK.PSKDRH  
BjTCP22b .....GSPV.....STALAVVKKPAVKK.PSKDRH  
BjTCP22d .....GSPV.....STALAVVKKPAVKK.PSKDRH  
AtTCP23 .....LTTTAPNSTTTTVAAKTPAKRPSKDRH  
BjTCP8a .....PEDPTTSSP.ATAAATTSVGVVTKRSTKDRH  
BjTCP8b .....PEDPTTSSP.ATAAATTSVGVVTKRSTKDRH  
AtTCP8 .....PEDSTLATTSTATATTT.....KRSTKDRH  
BjTCP15a .....EPNSEPNALS.KTPPPVRTSTKDRH  
BjTCP15d .....EPNSDPNALS.KKPPPVRTSTKDRH  
BjTCP15c .....EPNSDPNALS.KKPPPVRTSTKDRH  
BjTCP15e .....EPNSDPNALS.KKPPPVRTSTKDRH  
BjTCP15b .....EPNSDPNALS.KKPPPVRTSTKDRH  
BjTCP15f .....EPNSDPNALS.KKPPPVRTSTKDRH  
AtTCP15 .....EPNSEP.....KKPPPVRTSTKDRH  
BjTCP14a .....QLS..OTQTOPQOKPQPKDLQVTOEETAVAVAKKPPPKRSTKDRH  
BjTCP14b .....SOSQOSQOSQKSPQTTQKELLQTOEESAVVAKKPPPKRSTKDRH  
AtTCP14 .....HHSKPAEVKDFQIVVAS.....DKEPNKKP.QQNQLGPKRSSNKRDRH  
BjTCP20a .....HHSKPAEVKDFQIVVAS.....DSSSKQQNQNLGPKRSSNKRDRH  
BjTCP20c .....NRKPTTEIKDFQIVVAS.....DKEPNKKSNQNQLGPKRSSNKRDRH  
AtTCP20 .....LHNKPAEVKDFQIVVAS.....DSSSKQQNQNLGPKRSSNKRDRH  
BjTCP20b .....TETEVEKVLNNTVEGKRRKGGRE.....IQTKSRKDRH  
BjTCP6 .....KRKQTEVKGFDIVVGEKRRKGGRE.....IQTKSRKDRH  
AtTCP6 .....GFEIPEVRSREIKKAVKKDRHSKVIH  
BjTCP1a .....GFEIPEVRSREIKKAVKKDRHSKVIH  
BjTCP1e .....GFEIPEVRSREIKKAVKKDRHSKVIH  
BjTCP1b .....GFEIPEVRSREIKKAVKKDRHSKVIH  
BjTCP1c .....GFEIPEVRSREIKKAVKKDRHSKVIH  
BjTCP1d .....GFEIPEVRSREIKKAVKKDRHSKVIH  
AtTCP1 .....GFEIPEVRSREIKKAVKKDRHSKVIH  
BjTCP12a .....RKLRRLEQEKKNEEWDGTTSEKVSRRRTGKKRDRHSKVIH  
BjTCP12b .....RKLCKELEKKEKKEEWDGTTSEKVSRRRTGKKRDRHSKVIH  
AtTCP12 .....WKFKKLELKKKNEKVDGTTSEKVSRRRTGKKRDRHSKVIH  
BjTCP18a .....HPSLLPLNNTIGESQ.....LVEPSETITTHIEDSQRISTSDPKMKNKAKKPSRTDRHSKVIH  
BjTCP18d .....LPSLLPLNNTIGESQ.....LVEPSETITTHIEDSQRISTSDPKMKNKAKKPSRTDRHSKVIH  
BjTCP18b .....HPSLLPLNNTIGESQ.....LVEPSETITTHIEDSQRISTSDPKMKNKAKKPSRTDRHSKVIH  
BjTCP18c .....HPSLLPLNNTIGESQ.....LVEPSETITTHIEDSQRISTSDPKMKNKAKKPSRTDRHSKVIH  
AtTCP18 .....PSLHFPNNTIVEQP.....TEPSETINLIEDSQRISTSDPKMKNKAKKPSRTDRHSKVIH  
BjTCP17a .....NPRIVRASRIFFGGKDRHSKVIH  
BjTCP17b .....NPRIVRASRIFFGGKDRHSKVIH  
AtTCP17 .....NPRIVRASRIFFGGKDRHSKVIH  
BjTCP5c .....NPRIVRSRAFGGKDRHSKVIH  
BjTCP5a .....NPRIVRSRAFGGKDRHSKVIH  
BjTCP5b .....NPRIVRSRAFGGKDRHSKVIH  
AtTCP5 .....NPRIVRSRAFGGKDRHSKVIH  
BjTCP13a .....DPRIVRSRAFGGKDRHSKVIH  
BjTCP13c .....DPRIVRSRAFGGKDRHSKVIH  
BjTCP13b .....DPRIVRSRAFGGKDRHSKVIH  
AtTCP13 .....DPRIVRSRAFGGKDRHSKVIH  
BjTCP24a .....SSRIIRVSRASGGKDRHSKVIH  
BjTCP24b .....SSRIIRVSRASGGKDRHSKVIH  
BjTCP24c .....SSRIIRVSRASGGKDRHSKVIH  
BjTCP24d .....SSRIIRVSRASGGKDRHSKVIH  
AtTCP24 .....SSRIIRVSRASGGKDRHSKVIH  
BjTCP2a .....SSRIIRVSRASGGKDRHSKVIH  
BjTCP2d .....SSRIIRVSRASGGKDRHSKVIH  
BjTCP2b .....SSRIIRVSRASGGKDRHSKVIH  
BjTCP2c .....SSRIIRVSRASGGKDRHSKVIH  
AtTCP2 .....SSRIIRVSRASGGKDRHSKVIH  
BjTCP3 .....EVQGGHIVRSTGRKDRHSKVIH  
AtTCP3 .....EVQGGHIVRSTGRKDRHSKVIH  
AtTCP4 .....MDSKNGINNSQKARRTPKDRH  
AtTCP16 .....HIIRATGRKDRHSKVIH  
AtTCP10 .....HIIRATGRKDRHSKVIH

|          | 6Q      | 7Q         | 8Q    | 9Q    | 10Q      |            |        |                     |
|----------|---------|------------|-------|-------|----------|------------|--------|---------------------|
| BjTCP19  | KVEGR   | RRIRMPAGC  | AARIF | QITRE | LGHKSDG  | TRWLL      | E      |                     |
| AtTCP19  | KVEGR   | RRIRMPAGC  | AARVF | QITRE | LGHKSDG  | TRWLL      | E      |                     |
| BjTCP9a  | KVEGR   | RRIRMPATC  | AARIF | QITRE | LGHKSDG  | TRWLL      | E      |                     |
| BjTCP9c  | KVEGR   | RRIRMPATC  | AARIF | QITRE | LGHKSDG  | TRWLL      | E      |                     |
| BjTCP9b  | KVEGR   | RRIRMPATC  | AARIF | QITRE | LGHKSDG  | TRWLL      | E      |                     |
| BjTCP9d  | KVEGR   | RRIRMPATC  | AARIF | QITRE | LGHKSDG  | TRWLL      | E      |                     |
| AtTCP9   | KVEGR   | RRIRMPATC  | AARIF | QITRE | LGHKSDG  | TRWLL      | E      |                     |
| AtTCP11  | KVNGR   | SSRVTMPALA | AARIF | QITRE | LGHKTEGE | TEWLL      | S      |                     |
| BjTCP21b | SKVDGR  | RRIRMPIIC  | AARVF | QITRE | LGHKSDG  | TEWLL      | R      |                     |
| BjTCP21d | SKVDGR  | RRIRMPIIC  | AARVF | QITRE | LGHKSDG  | TEWLL      | R      |                     |
| BjTCP21a | SKVDGR  | RRIRMPIIC  | AARVF | QITRE | LGHKSDG  | TEWLL      | R      |                     |
| BjTCP21e | SKVDGR  | RRIRMPIIC  | AARVF | QITRE | LGHKSDG  | TEWLL      | R      |                     |
| BjTCP21c | SKVDGR  | RRIRMPIIC  | AARVF | QITRE | LGHKSDG  | TEWLL      | R      |                     |
| BjTCP21f | SKVDGR  | RRIRMPIIC  | AARVF | QITRE | LGHKSDG  | TEWLL      | R      |                     |
| AtTCP21  | SKVDGR  | RRIRMPIIC  | AARVF | QITRE | LGHKSDG  | TEWLL      | R      |                     |
| BjTCP7a  | SKVDGR  | RRIRMPIIC  | AARVF | QITRE | LGHKSDG  | TEWLL      | R      |                     |
| BjTCP7e  | SKVDGR  | RRIRMPIIC  | AARVF | QITRE | LGHKSDG  | TEWLL      | R      |                     |
| BjTCP7b  | SKVDGR  | RRIRMPIIC  | AARVF | QITRE | LGHKSDG  | TEWLL      | R      |                     |
| BjTCP7d  | SKVDGR  | RRIRMPIIC  | AARVF | QITRE | LGHKSDG  | TEWLL      | R      |                     |
| BjTCP7c  | .....   | .....MPIIC | AARVF | QITRE | LGHKSDG  | TEWLL      | R      |                     |
| AtTCP7   | SKVDGR  | RRIRMPIIC  | AARVF | QITRE | LGHKSDG  | TEWLL      | R      |                     |
| BjTCP22a | TKVDGR  | RRIRMPALC  | AARVL | QITRE | LGHKSDG  | TEWLL      | Q      |                     |
| BjTCP22c | TKVDGR  | RRIRMPALC  | AARVF | QITRE | LGHKSDG  | TEWLL      | Q      |                     |
| AtTCP22  | TKVDGR  | RRIRMPAMC  | AARVF | QITRE | LGHKSDG  | TEWLL      | Q      |                     |
| BjTCP22b | TKVDGR  | RRIRMPAVC  | AARVF | QITRE | LGHKSDG  | TEWLL      | Q      |                     |
| BjTCP22d | TKVDGR  | RRIRMPAVC  | AARVF | QITRE | LGHKSDG  | TEWLL      | Q      |                     |
| AtTCP23  | TKVDGR  | RRIRMPAIC  | AARVF | QITRE | LGHKSDG  | TEWLL      | Q      |                     |
| BjTCP8a  | TKVDGR  | RRIRMPALC  | AARVF | QITRE | LGHKSDG  | TEWLL      | Q      |                     |
| BjTCP8b  | TKVDGR  | RRIRMPALC  | AARVF | QITRE | LGHKSDG  | TEWLL      | Q      |                     |
| AtTCP8   | TKVDGR  | RRIRMPALC  | AARVF | QITRE | LGHKSDG  | TEWLL      | Q      |                     |
| BjTCP15a | TKVEGR  | RRIRMPAMC  | AARVF | QITRE | LGHKSDG  | TEWLL      | Q      |                     |
| BjTCP15d | TKVDGR  | RRIRMPAMC  | AARVF | QITRE | LGHKSDG  | TEWLL      | Q      |                     |
| BjTCP15c | TKVEGR  | RRIRMPAMC  | AARVF | QITRE | LGHKSDG  | TEWLL      | Q      |                     |
| BjTCP15e | TKVEGR  | RRIRMPAMC  | AARVF | QITRE | LGHKSDG  | TEWLL      | Q      |                     |
| BjTCP15b | TKVEGR  | RRIRMPAMC  | AARVF | QITRE | LGHKSDG  | TEWLL      | Q      |                     |
| BjTCP15f | TKVEGR  | RRIRMPAMC  | AARVF | QITRE | LGHKSDG  | TEWLL      | Q      |                     |
| AtTCP15  | TKVEGR  | RRIRMPAMC  | AARVF | QITRE | LGHKSDG  | TEWLL      | Q      |                     |
| BjTCP14a | .....   | .....MPALC | AARVF | QITRE | LGHKSDG  | TEWLL      | Q      |                     |
| BjTCP14b | TKVDGR  | RRIRMPALC  | AARVF | QITRE | LGHKSDG  | TEWLL      | Q      |                     |
| AtTCP14  | TKVDGR  | RRIRMPALC  | AARVF | QITRE | LGHKSDG  | TEWLL      | Q      |                     |
| BjTCP20a | TKVEGR  | RRIRMPALC  | AARIF | QITRE | LGHKSDG  | TEWLL      | Q      |                     |
| BjTCP20c | TKVEGR  | RRIRMPALC  | AARIF | QITRE | LGHKSDG  | TEWLL      | Q      |                     |
| AtTCP20  | TKVEGR  | RRIRMPALC  | AARIF | QITRE | LGHKSDG  | TEWLL      | Q      |                     |
| BjTCP20b | .....   | .....      | ..... | ..... | .....    | .....      | .....  |                     |
| BjTCP6   | TKVEGR  | RRVRLPPLC  | AARIF | QITRE | LGHKTDGE | TEWLL      | R      |                     |
| AtTCP6   | TKVEGR  | RRVRLPPLC  | AARIF | QITRE | LGHKSDG  | TEWLL      | Q      |                     |
| BjTCP1e  | TAQGLR  | RRVRLSIGV  | AROF  | FDI   | QDM      | LGFDKASE   | LDWLL  | K                   |
| BjTCP1b  | TAQGLR  | RRVRLSIGV  | AROF  | FDI   | QDM      | LGFDKASE   | LDWLL  | K                   |
| BjTCP1c  | TAQGLR  | RRVRLSIGV  | AROF  | FDI   | QDM      | LGFDKASE   | LDWLL  | K                   |
| BjTCP1d  | TAQGLR  | RRVRLSIGV  | AROF  | FDI   | QDM      | LGFDKASE   | LDWLL  | K                   |
| AtTCP1   | TAQGLR  | RRVRLSIGV  | AROF  | FDI   | QDM      | LGFDKASE   | LDWLL  | K                   |
| BjTCP12a | TAQGPLR | RRMRLSLQI  | ARKF  | FDI   | QDM      | LGFDKASE   | TEWLL  | S                   |
| BjTCP12b | TAQGPLR | RRMRLSLQI  | ARKF  | FDI   | QDM      | LGFDKASE   | TEWLL  | S                   |
| AtTCP12  | TAQGPLR | RRMRLSLQI  | ARKF  | FDI   | QDM      | LGFDKASE   | TEWLL  | S                   |
| BjTCP18a | AKGTR   | RRMRLSLDV  | AKEL  | FGI   | QDM      | LGFDKASE   | TEWLL  | T                   |
| BjTCP18d | AKGTR   | RRMRLSLDV  | AKEL  | FGI   | QDM      | LGFDKASE   | TEWLL  | T                   |
| BjTCP18b | AKGTR   | RRMRLSLDV  | AKEL  | FGI   | QDM      | LGFDKASE   | TEWLL  | T                   |
| BjTCP18c | AKGTR   | RRMRLSLDV  | AKEL  | FGI   | QDM      | LGFDKASE   | TEWLL  | T                   |
| AtTCP18  | AKGTR   | RRMRLSLDV  | AKEL  | FGI   | QDM      | LGFDKASE   | TEWLL  | T                   |
| BjTCP17a | VRGLR   | RRIRLSATT  | AIQL  | YDI   | QDR      | LGLSOPSKV  | IDWLL  | E                   |
| BjTCP17b | VRGLR   | RRIRLSATT  | AIQL  | YDI   | QDR      | LGLSOPSKV  | IDWLL  | E                   |
| AtTCP17  | VRGLR   | RRIRLSVMT  | AIQV  | YDI   | QDR      | LGLSOPSKV  | IDWLL  | E                   |
| BjTCP5c  | VRGLR   | RRIRLSVPT  | AIQL  | YDI   | QDR      | LGLSOPSKV  | IDWLL  | E                   |
| BjTCP5a  | VRGLR   | RRIRLSVPT  | AIQV  | YDI   | QDR      | LGLSOPSKV  | IDWLL  | E                   |
| BjTCP5b  | VRGLR   | RRIRLSVPT  | AIQL  | YDI   | QDR      | LGLSOPSKV  | IDWLL  | E                   |
| AtTCP5   | VRGLR   | RRIRLSVPT  | AIQL  | YDI   | QDR      | LGLSOPSKV  | IDWLL  | E                   |
| BjTCP13a | LRGLR   | RRVRLSVPT  | AIQL  | YDI   | QDR      | LGLDOPSKAV | DWLL   | N                   |
| BjTCP13c | LRGLR   | RRVRLSVPT  | AIQL  | YDI   | QDR      | LGLDOPSKAV | DWLL   | N                   |
| BjTCP13b | LRGLR   | RRVRLSVPT  | AIQL  | YDI   | QDR      | LGLDOPSKAV | DWLL   | N                   |
| AtTCP13  | LRGLR   | RRVRLSVPT  | AIQL  | YDI   | QDR      | LGLDOPSKAV | DWLL   | N                   |
| BjTCP24a | SKGLR   | RRIRLSVAT  | AIQF  | YDI   | QDR      | LGFDPQSKAV | EWLL   | N                   |
| BjTCP24b | SKGLR   | RRIRLSVAT  | AIQF  | YDI   | QDR      | LGFDPQSKAV | EWLL   | N                   |
| BjTCP24c | SKGLR   | RRIRLSVAT  | AIQF  | YDI   | QDR      | LGFDPQSKAV | EWLL   | N                   |
| BjTCP24d | SKGLR   | RRIRLSVAT  | AIQF  | YDI   | QDR      | LGFDPQSKAV | EWLL   | N                   |
| AtTCP24  | SKGLR   | RRIRLSVAT  | AIQF  | YDI   | QDR      | LGFDPQSKAV | EWLL   | N                   |
| BjTCP2a  | .....   | .....      | ..... | ..... | .....    | .....      | .....  |                     |
| BjTCP2d  | .....   | .....      | ..... | ..... | .....    | .....      | .....  |                     |
| BjTCP2b  | .....   | .....      | ..... | ..... | .....    | .....      | .....  |                     |
| BjTCP2c  | .....   | .....      | ..... | ..... | .....    | .....      | .....  |                     |
| AtTCP2   | TKSGPR  | RRVRLSVST  | ALQF  | YDI   | QDR      | LGYDOPSKAV | EWLL   | KAAEDSISELPSLNTHFPT |
| BjTCP3   | .....   | .....      | ..... | ..... | .....    | .....      | .....  |                     |
| AtTCP3   | TKAGPR  | RRVRLSAPT  | AIQF  | YDV   | QDR      | LGFDRPSKAV | DWLL   | IT.....KAKS         |
| AtTCP4   | TKAGPR  | RRVRLSAHT  | AIQF  | YDV   | QDR      | LGFDRPSKAV | DWLL   | IT.....KAKS         |
| AtTCP16  | LKIGGR  | RRIRIPPSV  | APQL  | FRL   | TKE      | LGFKTDGE   | TVSWLL | QN.....             |
| AtTCP10  | TKSGPR  | RRVRLSAHT  | AIQF  | YDV   | QDR      | LGYDRPSKAV | DWLL   | IT.....K            |

|          | 110   | 120                                    | 130                   | 140           |
|----------|-------|----------------------------------------|-----------------------|---------------|
| BjTCP19  | SEPA  | TEATGTGTPAIAVSVNGALKIPTDSTPQFESDGGSG   |                       |               |
| AtTCP19  | REPA  | TEATGTGTPAIAVSVNGTLKIPITSSPVLNDGGRDGD  |                       |               |
| BjTCP9a  | REPA  | IAATGTGTPAIAMSVNGTLKIPITTTNADADVAENPAK |                       |               |
| BjTCP9c  | REPS  | IAATGTGTPAIAMSVNGTLKIPITTTNADADLSENPAK |                       |               |
| BjTCP9b  | REPA  | IAATGTGTPAIAMSVNGTLKIPITTTNADSDVDNSAK  |                       |               |
| BjTCP9d  | REPA  | IAATGTGTPAIAMSVNGTLKIPITTTNADSDAGDNP   |                       |               |
| AtTCP9   | REPA  | IAATGTGTPAIAMSVNGTLKIPITTTNADSDMGENLMK |                       |               |
| AtTCP11  | REPS  | IAATGYGTK                              |                       |               |
| BjTCP21b | REPS  | IAATGTGTPASFSSTASLSASSSPPFALG          | KRVLRGEE              |               |
| BjTCP21d | REPS  | IAATGTGTPASFSSTASLSSSSS                | PFTLIG                | KRVVRAEE      |
| BjTCP21a | REPS  | IAATGTGTPASFSSTASLSSTSS                | SFTLIG                | KRGVRAE       |
| BjTCP21e | REPS  | VAATGTGTPASFSSTASLSSTSS                | SFTLIG                | KRVVRAE       |
| BjTCP21c | REPS  | IAATGTGTPASFSSTASLSSTSS                | PFTLIG                | KRVVRAEE      |
| BjTCP21f | REPS  | IAATGTGTPASFSSTASLSSSSS                | PPFALG                | KRVVRAEE      |
| AtTCP21  | REPS  | IAATGTGTPASFSSTASLSSTSS                | PFTLIG                | KRVVRAEE      |
| BjTCP7a  | REPS  | IAATGTGTPASFSSTASVSRGSSSTTISTSTNCTLS   | SSSL                  |               |
| BjTCP7e  | REPS  | IAATGTGTPASFSSTASVSRGNSSTTISTSANCTL    | SSSL                  |               |
| BjTCP7b  | REPS  | IAATGTGTPASFSSTVSRGNSSTTISTSANCTL      | SSSL                  |               |
| BjTCP7d  | REPS  | IAATGTGTPASFSSTASLRGNSSTTISTSANCTL     | SSSL                  |               |
| BjTCP7c  | REPS  | IAATGTGTPASFSSTASLRGNSSTTISTSANCTL     | SSSL                  |               |
| AtTCP7   | REPS  | IAATGTGTPASFSSTASLRGNSSTTISTSANCTL     | SSSL                  |               |
| BjTCP22a | REPA  | IASTGTGTPANFSTLNATLRG                  | GGG                   | STIFAQSSKSSP  |
| BjTCP22c | REPA  | IASTGTGTPANFSTLNATLRG                  | GGGG                  | STIFAQSSKSSP  |
| AtTCP22  | REPA  | IASTGTGTPANFSTLNATLRG                  | GGG                   | STLFSQAKSSSSP |
| BjTCP22b | REPA  | IATTTGTGTPANFSTLNATLRG                 | GGGGGGGG              | TVFAQSSKSSP   |
| BjTCP22d | REPA  | IATTTGTGTPANFSTLNATLRG                 | GGGGGGGG              | TVFAQSSKSSP   |
| BjTCP23  | REPA  | IAATGTGTPANFSTLNATLRG                  | GGGGGGGG              | TVFAQSSKSSP   |
| BjTCP8a  | REPA  | VAATGTGTPANFSSLSVLRSGSTLSAPPSKSVPL     | LYG                   |               |
| BjTCP8b  | REPA  | VAATGTGTPANFSSLSVLRSGSTLSAPPSKSVPL     | LYG                   |               |
| AtTCP8   | REPA  | VAATGTGTPANFSSLSVLRSGSTLSAPPSKSVPL     | LYG                   |               |
| BjTCP15a | REPA  | IAATGTGTPANFASLNISLRSSRSSL             | SAAHLRT               |               |
| BjTCP15d | REPA  | IAATGTGTPANFASLNISLRSSRSSL             | SAAHLRT               |               |
| BjTCP15c | REPA  | IAATGTGTPANFASLNISLRSSRSSL             | SAAHLRT               |               |
| BjTCP15e | REPA  | IAATGTGTPANFASLNISLRSSRSSL             | SAAHLRT               |               |
| BjTCP15b | REPA  | IAATGTGTPANFASLNISLRSSRSSL             | SAAHLRT               |               |
| BjTCP15f | REPA  | IAATGTGTPANFASLNISLRSSRSSL             | SAAHLRT               |               |
| AtTCP15  | REPA  | IAATGTGTPANFASLNISLRSSRSSL             | SAAHLRT               |               |
| BjTCP14a | REPS  | IAATGTGTPANFASLNISLRSSRSSL             | SAAHLRT               |               |
| BjTCP14b | REPS  | IAATGTGTPANFASLNISLRSSRSSL             | SAAHLRT               |               |
| AtTCP14  | REPS  | IAATGTGTPANFASLNISLRSSRSSL             | SAAHLRT               |               |
| BjTCP20a | REPS  | IAATGSSTIPASALASAAAASVSHHLLQGGSL       | TAGLMISHLDDGG         |               |
| BjTCP20c | REPS  | IAATGSSTIPASALASAAAASVSHHLLQGGSL       | TAGLMISHLDDGG         |               |
| AtTCP20  | REPS  | IAATGSSTIPASALASAAAASVSHHLLQGGSL       | TAGLMISHLDDGG         |               |
| BjTCP20b | REPS  | IAATGSSTIPASALASAAAASVSHHLLQGGSL       | TAGLMISHLDDGG         |               |
| BjTCP6   | REPS  | ISATDS                                 | VSQPPHADV             |               |
| AtTCP6   | REPS  | LSATVNGIKPTESVVSQPPHADV                |                       |               |
| BjTCP1a  | SRRG  | NELVQEKLLNKKDGYGNRRGGVEDDEED           |                       |               |
| BjTCP1e  | SRRR  | KELVQEKLLNKKDDDFGNRRGGVEDDEED          |                       |               |
| BjTCP1b  | SRRR  | KELVQEKLLNKKDDDFGNRRGGVEDDEED          |                       |               |
| BjTCP1c  | SRRR  | KELVQEKLLNKKDDDFGNRRGGVEDDEED          |                       |               |
| BjTCP1d  | SRRR  | KELVQEKLLNKKDDDFGNRRGGVEDDEED          |                       |               |
| AtTCP1   | SRKA  | KEVVOAKLNNDDEDFGNRRGGVEDDEED           |                       |               |
| BjTCP12a | SKAS  | KOVKESAAAASG                           | NHEHLQVSDNVND         |               |
| BjTCP12b | SKAS  | KOVKESAAAASG                           | NHEHLQVSDNVND         |               |
| AtTCP12  | SKTS  | KQLKERVAAASG                           | GKDEHLQVDEKED         |               |
| BjTCP18a | AKPE  | IKIANSLSNQFNHGGFSSCEESQTRPALGSMHT      | SSDLCKLSSM            |               |
| BjTCP18d | AKPE  | IKIANSLSNQFNHGGFSSCEESQTRPALGSMHT      | SSDLCKLSSM            |               |
| BjTCP18b | AKPE  | IKIANSLSNQFNHGGFSSCEESQTRPALGSMHT      | SSDLCKLSSM            |               |
| BjTCP18c | AKPE  | IKIANSLSNQFNHGGFSSCEESQTRPALGSMHT      | SSDLCKLSSM            |               |
| AtTCP18  | AKPE  | IKIANSLSNQFNHGGFSSCEESQTRPALGSMHT      | SSDLCKLSSM            |               |
| BjTCP17a | AQND  | VAMLPPLOQPPG                           | FHPNLTAAAAG           |               |
| BjTCP17b | AQND  | VAMLPPLOQPPG                           | FHPNLTAAAAG           |               |
| AtTCP17  | AKND  | VDLLPPLOQPPG                           | FHQLNPNLTGLG          |               |
| BjTCP5c  | AKDD  | VKLPLOQPPG                             | FNQMYPNLIFG           |               |
| BjTCP5a  | AKDD  | VNLPLOQPPG                             | FNQMYPNLIFG           |               |
| BjTCP5b  | AKDD  | VKLPLOQPPG                             | FNQMYPNLIFGNSGIG      |               |
| AtTCP5   | AKDD  | VKLPLOQPPG                             | FNQMYPNLIFGNSGIFG     |               |
| BjTCP13a | AKEE  | DELPPLPVSPETFTLFNHHQSPFLNLGQR          |                       |               |
| BjTCP13c | AKEE  | DELPPLPVSPETFTLFNHHQSPFLNLGQR          |                       |               |
| BjTCP13b | AKEE  | DELPPLPVSPETFTLFNHHQSPFLNLGQR          |                       |               |
| AtTCP13  | AKEE  | DELPPLPVSPETFTLFNHHQSPFLNLGQR          |                       |               |
| BjTCP24a | AADS  | SELPPINTSFDQALS                        | LSKACSST              |               |
| BjTCP24b | AADS  | SELPPINTSFDQALS                        | LSKACSST              |               |
| BjTCP24c | AADS  | SDLNPIDTDF                             | QTLSSKSS              |               |
| BjTCP24d | AADS  | SELNPIDTDF                             | QTLSSKSS              |               |
| AtTCP24  | AADS  | SDLNPIDTDF                             | QTLSSKSS              |               |
| BjTCP2a  | NDDEN | QIQTGTGAS                              | AAAASACSSNS           |               |
| BjTCP2d  | TDDEN | QIQTGTGAS                              | AAAASACSSNS           |               |
| BjTCP2b  | MNDDE | QIQTGTGAS                              | AAAASACSSNS           |               |
| BjTCP2c  | NDDDN | QIQTGTGAS                              | AAAASACSSNS           |               |
| AtTCP2   | DDENH | QIQTGTGAS                              | AAAASACSSNS           |               |
| BjTCP3   | AIDGL | LAELPPWNPADAIROAAAAN                   | KPKRSKTVISPPGIHGGSGEE |               |
| AtTCP3   | AIDDL | LAELPPWNPADAIROAAAAN                   | KPKRSKTVISPPGIHGGSGEE |               |
| AtTCP4   | SIDE  | LAELPPWNPADAIROAAAAN                   | KPKRSKTVISPPGIHGGSGEE |               |
| AtTCP16  | REPA  | FAATGHGVTTSNEDIQPNRNFPSYTFNG           |                       |               |
| AtTCP10  | AKTA  | DKLELGETTTTTTRQEPVNTKPESTLVFQRENND     | QTFVAAN               |               |

BjTCP19 .....KRRRRNCTSEFVDINR.QDSSVTS.....  
AtTCP19 .....LIKRRRRNCTSDFVDVNDSCSSSVTS.....  
BjTCP9a .....KRRKRPSNSEYIDINEPVSVSVSS.....  
BjTCP9c .....KRRKRPSNSEYIDINEAASVSS.....  
BjTCP9b .....KRRKRPSNSEYIDINEAVTVSVSSGLAPISSGL  
BjTCP9d .....KRRKRPSNSEYIDINEAVSVSVSSGLAPISSGL  
AtTCP9 .....KRRKRPSNSEYIDISDAVSASSGLAPIAATTTTI  
AtTCP11 .....LISNVWVDAADSSSSSS.....  
BjTCP21b .....GESVGPGGGELTVGHAMS.....  
BjTCP21d .....GESGGGGGGHTV GASLMS.....  
BjTCP21a .....GEAGAGGGG.LTVGPTMG...AS.....  
BjTCP21e .....GVAGAGGGGGLTVGHMTG...AS.....  
BjTCP21c .....GESGAGGG.ELSVGHTMG.....  
BjTCP21f .....EESGGGGGGELSVGHMTGSSVM.....  
AtTCP21 .....GESGGGGGGGLTVGHMTGSLMG.....  
BjTCP7a .....DHK.....PFILGRRLREDSGGGKDD.....  
BjTCP7e .....DHKPLLGSPPFILGRRLRADEVSGKDESH.....  
BjTCP7b .....DQKPMLGSSPPFILGRVRADED.....  
BjTCP7d .....DHKPLLGSPPFILGRVRADED.....  
BjTCP7c .....DHKPLLGSPPFILGRVRREGFGG.....  
AtTCP7 .....PTSLGGTSPFILGRVRADEDSSNNSHNS.....  
BjTCP22a FHSSTGMSLYEDSNGTNGSSSSAAKLLN.AATAAQAAVFQFHQYQPIMSAERNP..PT  
BjTCP22b FHSSTGMSLYEDSNGANGSSSSAVVDPSPRKLNAQAQAAVFGFHQYVPPIT.....PT  
AtTCP22 FHSSTGMSLYEDNNGTNGSS...VDPSPRKLNAQAQAAVFGFHQYVPPIMSTERNP..NT  
BjTCP22c FHGSGMSLYDDSNANGSSSSVVDHRSKLLNGG...VFGFHPPIMSAE.....  
BjTCP22d FHSSGMSLYDDSNANGSSSSAVVVDHRSKLLNGG...VFGFHPPIMSAE.....  
AtTCP23 .....AAQNAAVFQFQQLYHPHHTTSSSSSL  
BjTCP8a .....ALGLTHHQYEQ...GGAFGAHTPPLLGFHHHLQHQHQHQHQQA.PA  
BjTCP8b .....ALGLSHHHHQYEEQGGGAFGPHTPPLLGFHHHLQHQ...QLHQQA.PA  
AtTCP8 .....ALGLTHHQYDEQG.GGGVFAAHTSPLLGFHHHLQHQHQHQNDP.VE  
BjTCP15a .....APSSYFHSPTM.....AHPHOV  
BjTCP15d .....NPSSYFHP.....HOV  
BjTCP15c .....TPSSYFHSPTM.....AHHOV  
BjTCP15e .....TPSSYFHSPTM.....AHHOV  
BjTCP15b .....TPSNYYFHSPAMAQHHH...QQQLHOV  
BjTCP15f .....TPSSYFHSPTMSQHHHQHQHQHHV  
AtTCP15 .....TPSSYFHSPHQSMTHH...LQHQHOV  
BjTCP14a Q.RSGGGGFLPHPHHLQGRATTSLLFPIDNFTPTTSFLNFHNPKQEGDQDSSEELSPDK  
BjTCP14b QQRSGGGGFLPHPHHLQGRATTSLLFPIDNFTPTTSFLNFHNPKQEGDQDSSEELSSDK  
AtTCP14 Q.QQRGGGVGFHHPHLQGRAPTSLLFPIDNFTPTTSFLNFHNPKQEGDQDSSEELNSEK  
BjTCP20a .....SSSRPNWVGWGGGGGS.....  
BjTCP20c .....SSSRPNWVGWGGGGGS.....  
AtTCP20 .....SSGRPLNWGIGGGEGVS.....  
BjTCP20b .....GGRPSVWVGWGGGEASR.....  
BjTCP6 .....LNLDDGSSRSQ.....  
AtTCP6 .....LMICHSVVEEASR.....  
BjTCP1a .....GDKSFVYGWSPD.SCEEVVEVVKKTEKS.....NV  
BjTCP1e .....GDKSFVYGLSPD.SCEEVVEVVKKTAVKS.....NI  
BjTCP1b .....DGDKSFYLGSSPDSWEEVACEVKKAKQRNKKIDLSNI  
BjTCP1c .....EDGDESFVYGSPPDSCKEEVVEVVKKAEKRKKNIELNSI  
BjTCP1d .....DVGDKSFVYGSSSDCFKEEVVEVVKKPEKRKKIELNSI  
AtTCP1 .....DNGDKSFVYGLSPGYGEEVVEVVEATKAGIRKKKSELRNI  
BjTCP12a .....ETQKVK...GRTKRVDSCKKKQREKAR.....  
BjTCP12b .....ETLKVSM...RRAKRVEDSCKKESREKAR.....  
AtTCP12 .....ETLKLVRVKRRRTKTMESFCKTESREKAR.....  
BjTCP18a .....GTVEDRGSNTNSTETRGNKVDGRSMRGKRRMLQARTPILKK  
BjTCP18d .....QTRGNKVDGRSMRGKRRMSQPRTPILKK  
BjTCP18b .....WTVEDRGSN...TSMTENKVDGRTMRGKRRMSQR.TPILKE  
BjTCP18c .....WTVEDRSSN...TSMTENKVDGRTMRGKRRMSQR.TPILKE  
AtTCP18 .....WTVEDRGSNTNSTETRGNKVDGRSMRGKRRKREPRTPILKK  
BjTCP17a .....ESFPGIFESFELGSCSSRTDT.....TQKEG  
BjTCP17b .....ESFPGIFENFDLGSCSSRAET.....TQRES  
AtTCP17 .....ESFPGVFDLGRTOREALDLEK.....RKWVN  
BjTCP5c .....ESSSTSAPPGTNYTNLGLQSWDLGGSSSRTRSRIIDTTTTL.RES  
BjTCP5a .....ESSSTSAAAFPGTNLGFLESWNLGGSSSRTRSRIADTTP...RES  
BjTCP5b .....ESSSTS...AFPGSNLGFLESYDLGGSSSRTRSRIQDTTTTTPRET  
AtTCP5 .....ESPSSTTSTFPGTNLGFLENWDLGGSS.RTRARLDTTTTTQ.RES  
BjTCP13a .....PGQDPTQLGFKINGCVVEESTTTSSREENNNERGEKDVVF  
BjTCP13c .....PGQDPIQLGING...STTTTTSSREENNNERGEKDVVF  
AtTCP13 .....PGQDPTQLGFKINGCVQKSTTTSSREENDREKENDVVY  
BjTCP24a .....SES...SLLSLSRTESRGKARERARERTAKD...DKDL  
BjTCP24b .....SES...SLLSLSRTESRGKARERARERTAKEK...DKDL  
BjTCP24c .....SES...SLLSLSRTESRGKRTSKEK...D  
BjTCP24d .....SES...SLLSLSRTESRGKARERTAK...D  
AtTCP24 .....SES...SLLSLSRTEIRGKARERARERTAKDR...DKDL  
BjTCP2a .....DTSKNSSGLSLSRSELRDKARERARERTAKETKERDHN..  
BjTCP2d .....DTSKNSSGLSLSRSELRDKARERARERTAKETKERDHN..  
BjTCP2b .....DTSKNSSGLSLSRSELRDKARERARERTAKETKERDGTN..  
BjTCP2c .....DTSKNSSGLSLSRSELRDKARERARERTAKETKERDGN..  
AtTCP2 .....DTSKNSSGLSLSRSELRDKARERARERTAKETKERDHN..  
BjTCP3 .....TGHHSN.....FLPASVS.....TPH  
AtTCP3 .....HRIGEEEDNESSFLPASMDSIADTIKSFPPVAST.....TQS  
AtTCP4 .....NNGGAEHPSNNNESSFLPPSMDSIADTIKSFPPVIGSSTEAPSNHNLNMH  
AtTCP16 .....LDPEDAMKTFPPATTTTNGGGGTNINFNQNYPHQDDNNMV

```

BjTCP19 .....GLAPITASSYGVN.....L
AtTCP19 .....GLAPITASNRYGVN.....I
BjTCP9a .....GLAPASTVAQQTLPQGMIPMMAFPPSNAV.....V
BjTCP9c .....GLAPTSTVAQQTLPQGMIPMMAFPPSNAV.....V
BjTCP9b APISSGLAPVTTVAQQTLPQGMIPMMAFPPSNAV.....I
BjTCP9d APISSGLASVSTVQQTLPQGMIPMMAFPPSNAV.....I
AtTCP9  QP..PQALASSTVAQQLLPQGMYPMMAFPPSNAM.....I
AtTCP11 .....
BjTCP21b .....G
BjTCP21d .....S
BjTCP21a .....L
BjTCP21e .....L
BjTCP21c .....A
BjTCP21f .....S
AtTCP21 .....G
BjTCP7a .....MGSF
BjTCP7e .....ETMGSF
BjTCP7b .....
BjTCP7d .....
BjTCP7c .....
AtTCP7  .....SVGKDEFTT
BjTCP22a LGKPYREDYFKESE..PSGSSSQKPGQFOEQEMGPPGGMGRG..TANVVVPPMMAVAPGTT
BjTCP22b LGKPYREDYFKESE..PSGSSSQKPGQFOEQEMGPPGTVGVRG..TANVVVPPMMAVAPGST
AtTCP22 LVKPYREDYFKEPS..SAAEPSESSQKASQFOEQELAQGRG..TANVVVPPMMAVAPGTT
BjTCP22c .RNPYREDYFNKESSEVPSGSSSQKPGQFOEQELGPPGGMGRGPTASVVVPPMMAVAPGST
BjTCP22d .RNPYREDYFNKESSEVPSGSSSQKPGQFOEQELGPPGGMGMG...MGRGVPPMMAVAPGST
AtTCP23 PKTFREEDLFKDPNFDQEPGSRSPKPGSEAPDQDPGSTRSRTQNMIPPMWALAPTAST
BjTCP8a ETIPGPDGESFSRKRYSRSDSSKEDGEGKQNESKSLKESSEPPAAAATGAPMMAVAPTNR
BjTCP8b ETD...GEGFSRKRYSRSE..KEDDEGKQOSESKSLKESSEPPAAAATGAPMMAVAPTNR
AtTCP8  TIP...EGENFSRKRYSRSDLSKENDDRKQENKSLKESSE..TSGPTAAPMMAVAPPSRS
BjTCP15a RPKHESHSSSSSS..QLLDHNQMGNYLVOSTAGS.....LPTS
BjTCP15d RPKNETHSSSSSS..QLLDHNQMGSYLVOSTAAGS.....LPTS
BjTCP15c RPKNESHSSSSSS..QLLDHSQMGNYLVOSTAGS.....LPTS
BjTCP15e RPKNESHSSSSSS..QLLDHSPMGNYLVOSTAGS.....LPTS
BjTCP15b RPKNESDSCSSSS..QLVDHNQMGNYLVOSTAGS.....LPTS
BjTCP15f RPKNESHSSSSSS..QLVDHNQMGNYLVOSTAGS.....LPSS
AtTCP15 RPKNESHSSSSSSQLLDHNQMGNYLVOSTAGS.....LPTS
BjTCP14a KRRLOTTSDLH...HQHDQIGGYTLQSSNSG.....STATTA
BjTCP14b KR...RLQDLH...HQHDQIGAYTLQSSNSG.....STATTA
AtTCP14 KRRLOTTSDLHQQQQHHDQIGGYTLQSSNSGSGT.....ATAAAQ
BjTCP20a .....RS
BjTCP20c .....RS
AtTCP20 .....RS
BjTCP20b .....
BjTCP6   .....TQ
AtTCP6   .....
BjTCP1a SSKGLMDKARGKSKQITREMV.YDHPEAVSEITQ.....
BjTCP1e SSKGLREKARGKSKQITREMT.YDHPETISEITQ.....
BjTCP1b SSKGSRAKARGKAKELT...YDHPETISEITQ.....
BjTCP1c SSKGSRAKARGKAKEMT...YDHPETISEITQ.....
BjTCP1d SSKRSRAKALGKAKEIAREMI.SDHPETASEITQ.....
AtTCP1  SSKGLGAKARGKAKERTKEMMAYDNPETASDITQ.....
BjTCP12a .....ERARERTMTKMKMRLSGLIDTSKTFADPNQ.....
BjTCP12b .....ERARERTMTKMKMRLTGLMDTSKTFSDPNQ.....
AtTCP12 .....KRARERTMAKMKMRLF...ETSETISDPHQ.....
BjTCP18a LSKDERAKARERAKDRTEKMKMRR...SQVTVL.....
BjTCP18d LSKDARAKARERAKDRTEKMKMRRS...AQVNVV.....
BjTCP18b MSKDARAKARERAKDRTEKMKMRRR..PQVNAVE.....
BjTCP18c MSKDARAKARERAKDRTEKMKMRRR..PQVNAVE.....
AtTCP18 LSKEERAKARERAKDRTEKMKMRRR..PQVNAVE.....
BjTCP17a LNLES...HGFDIDHHFYSNSNHRDKLYFPSSR.....
BjTCP17b LNLERNLSLHGFDIDHHFYSNSNSQSNKLYPPTL.....
AtTCP17 LDHVPD...HIDHHNHFSNSIQSNKLYPPTI.....
BjTCP5c FDLDKKGKWKHDENSNNHHEHGFDMNHNHFLTN.....
BjTCP5a FDLDKKGKWKQDENSNNHDDLGFNTHQHFLTN.....
BjTCP5b FDLDKKGKWKHDENNTNHHQDHGFDTNHQHFLSN.....
AtTCP5  FDLDKKGKWKNDENSNNQDHQGFNTNHQOQFPPTN.....
BjTCP13a ANNNHIGSYGTYN.MEHHHQOHS..SFQADYHQH.....
BjTCP13c ANNNHIGSYGTYN.MEHHHQOHS..SFQADYHQH.....
BjTCP13b TNNNHIGSYGTYOYMEQHQQHTRFQADYPHQH.....
AtTCP13 TNNHHVGSYGTYNLEHHHHHHQHLSLQADYHSH.....
BjTCP24a QNAQSS.FTQLLTGGFDEPNRNRWIGG..SSSDCF.....
BjTCP24b QNADQSSFTQLLTGGFDEPNRNRWIGGSSSSSDCF.....
BjTCP24c KDLQSS.FTQLLTGGLDEPNRNRWTGAG..SSDCF.....
BjTCP24d KDLQSS.FTQLLTRGLDEPNRNRWTGGG..STDCCF.....
AtTCP24 QNAHSS.FTQLLTGGFDQOPSNRNRWTG..GSDCCF.....
BjTCP2a  ...TTSFTDLLNSGSDPVNINRQWMAFSSSSSQ.....
BjTCP2d  ...TGSFTDLLNSGSDPVNINRQWMAFSSSPAQ.....
BjTCP2b NHHTTTSFTDLLNSGSDPVNINRQWMAFSSSPAQ.....
BjTCP2c NHHTTS.FTDLLNSGSDPVNANRQWMAFSSSPAP.....
AtTCP2  ...HTSFTDLLNSGSDPVNSNRQWMAFSSSP.....
BjTCP3  YHQPPP...SRADAQSO.DLRLSLHSFONGPP.....
AtTCP3  YHQPPP...SRGNTQNDLLRLSLQSFONGPP.....
AtTCP4  YHQHPPDLLSRTNSQNO.DLRLSLQSFDPGPPSLLHHQHH.....HHT
AtTCP16 .....
AtTCP10 SRTTTPPPNLSQDLGLSLHPFQGNNTVVVPEPN.....N

```

|          | 180                                                           | 190       | 200    |
|----------|---------------------------------------------------------------|-----------|--------|
| BjTCP19  | MNVNAQSFVFFWQT...                                             | GFVTGGPN  |        |
| AtTCP19  | LNVTQGFVFPWPMGMAFVITGGPD                                      |           |        |
| BjTCP9a  | PTVGAFLLVQNPNSN...                                            | QPRILAYPA |        |
| BjTCP9c  | PTVGAFLLVPHVAVPLSQPOMLAFPA                                    |           |        |
| BjTCP9b  | PTVGAFLLVPHVAGPTNQPOMLAFPA                                    |           |        |
| BjTCP9d  | PTVGAFLLVPHVAGPTNQPOMLAFPA                                    |           |        |
| AtTCP9   | PTVGAFLLIPQIAGPSNQPLLAFPA                                     |           |        |
| AtTCP11  | .....                                                         | MTSPQ     |        |
| BjTCP21b | GGGGGFWAVPARQDFG                                              |           |        |
| BjTCP21d | GSGGFWAVPARQDFG                                               |           |        |
| BjTCP21a | MSGGFWAVPARPDFG                                               |           |        |
| BjTCP21e | MSGGFWAVPARPDLG                                               |           |        |
| BjTCP21c | SGGGFWAVPARNDFG                                               |           |        |
| BjTCP21f | GSGGFWAVPARPDLG                                               |           |        |
| AtTCP21  | GSGGFWAVPARPDFG                                               |           |        |
| BjTCP7a  | ATPAGFWAVPARPDFG                                              |           |        |
| BjTCP7e  | AAPAGFWAVPARPDFG                                              |           |        |
| BjTCP7b  | .TPSGFWAVPARQDFG                                              |           |        |
| BjTCP7d  | .TPSGFWAVPARPEFG                                              |           |        |
| BjTCP7c  | AIPAGFWSVPARPEFG                                              |           |        |
| AtTCP7   | TTPAGFWAVPARPDFG                                              |           |        |
| BjTCP22a | NGGSFWMMLPMSGGGREOMQQO                                        |           |        |
| BjTCP22c | NGGSFWMMLPMSGGGREOMQQO                                        |           |        |
| AtTCP22  | NGGSFWMMLPMSGGGREOMQQO                                        |           |        |
| BjTCP22b | NGGSFWMMLPMSGGGREOMQQO                                        |           |        |
| BjTCP22d | NGGSFWMMLPVSGGGREOMQQO                                        |           |        |
| AtTCP23  | NGGSFWMMLPVGGGGG..PANVQD                                      |           |        |
| BjTCP8a  | AGGNTFWMMLPVPTTAAGNOPAAMESSSNAS.RAHMWP..FGGGG..AGAGGGGATHFMAG |           |        |
| BjTCP8b  | AGGNTFWMMLPVPTTAAGNOPAAMESSSNANNRAHMWP..FGAGAGAGGGGGGATHFMAG  |           |        |
| AtTCP8   | GAGNTFWMMLPVPTTAAGNQMESSNNNTAAGHRAPPMWPFVNSAGGGAGGGGAATHFMAG  |           |        |
| BjTCP15a | QTPPTAPFWSSGDS                                                |           |        |
| BjTCP15d | QTPPTAPFWSSGDS                                                |           |        |
| BjTCP15c | QTPATAPFWSSGDN                                                |           |        |
| BjTCP15e | QTPATAPFWSSGDN                                                |           |        |
| BjTCP15b | QTPATAPFWSSGDN                                                |           |        |
| BjTCP15f | QTPATAPFWSSGDN                                                |           |        |
| AtTCP15  | QSPATAPFWSSGDN                                                |           |        |
| BjTCP14a | QIPGNFMMVAAAAAAGG...NNNQTGGGSSVGSAGG                          |           |        |
| BjTCP14b | QIPGNFMMVAAAAAGN...NNQTGGGSSVGSAGG                            |           |        |
| AtTCP14  | QIPGNFMMVAAAAAAGGGGNNNQTGGGLMTASIGTGG                         |           |        |
| BjTCP20a | SLPTGLWPNVAGFGAG                                              |           |        |
| BjTCP20c | SLPTGLWPNVAGFGAAG                                             |           |        |
| AtTCP20  | SLPTGLWPNVAGFGSG                                              |           |        |
| BjTCP20b | ...LWPNVAG                                                    |           |        |
| BjTCP6   | .LANGFWRNETGFGIV                                              |           |        |
| AtTCP6   | MEANGLWRNETG                                                  |           |        |
| BjTCP1a  |                                                               |           | T      |
| BjTCP1e  |                                                               |           | T      |
| BjTCP1b  |                                                               |           | T      |
| BjTCP1c  |                                                               |           | T      |
| BjTCP1d  |                                                               |           | T      |
| AtTCP1   |                                                               |           | S      |
| BjTCP12a |                                                               |           | V      |
| BjTCP12b |                                                               |           | E      |
| AtTCP12  |                                                               |           | E      |
| BjTCP18a |                                                               |           | D      |
| BjTCP18d |                                                               |           | V      |
| BjTCP18b |                                                               |           | E      |
| BjTCP18c |                                                               |           | E      |
| AtTCP18  |                                                               |           | V      |
| BjTCP17a | SCH                                                           |           |        |
| BjTCP17b | STYNSSSSCHYNLG                                                |           | QL     |
| AtTCP17  | TSS..SSSYHYNLG                                                |           | HL     |
| BjTCP5c  | PYNNNTSSYYNLG                                                 |           | HL     |
| BjTCP5a  | LYNNNNASSYYNLG                                                |           | HL     |
| BjTCP5b  | PYNNNTSSYYNLG                                                 |           | HL     |
| AtTCP5   | PYNN..TSAYYNLG                                                |           | HL     |
| BjTCP13a | QLHSLVPPFSQFLV                                                |           | CP     |
| BjTCP13c | QLHSLVPPFSQFLV                                                |           | CP     |
| BjTCP13b | QLHSLVPIQSQFLV                                                |           | CP     |
| AtTCP13  | QLHSLVPPFSQILV                                                |           | CP     |
| BjTCP24a | NPVQLIPNSSSSS                                                 | LHHYN     | TNNHRO |
| BjTCP24b | NPVQLIPTTSSSSS                                                | LHHFN     | SNQTSL |
| BjTCP24c | NPVQLIP                                                       |           | ADSLN  |
| BjTCP24d | NPVQLMPNS                                                     | LNHR      | QEPSLN |
| AtTCP24  | NPVQLQIP                                                      |           | NSSS   |
| BjTCP2a  | MEYLSGGLILGSGO..THFPVQNAHP                                    |           | FSD    |
| BjTCP2d  | MEYLTSGGLILGSGO..THFPQTSNAHP                                  |           | FSD    |
| BjTCP2b  | MEYFSSGGLILGSGO..THFPQTNHPPFLAI                               |           | SDQHHH |
| BjTCP2c  | MEYFSSGGLILGSGO..THFPQTNHPPFLAI                               |           | SDQHHH |
| AtTCP2   | MEYFSSGGLILGSGOQTHFPQTNHPPFSSIS                               |           | SDQHHH |
| BjTCP3   | FSDQTEHALFSGQSN..PLVFDSSASSWQSO                               |           | QN...  |
| AtTCP3   | FPNQTEPALFSGQSNQAFDSSSTASWEQSH                                |           | QSPEFG |
| AtTCP4   | SASASEPTLFYQGSN..PLGFDTSSWEQSSSE                              |           | FG...  |
| AtTCP16  |                                                               |           |        |
| AtTCP10  | FTTTHFDTFGRISGWN                                              |           |        |



|          | 210           | 220        | 230                     |
|----------|---------------|------------|-------------------------|
| BjTCP19  | .. QMGHMWAIP  | TVAAPSF    | LNGGGTRPVPSYVSN         |
| AtTCP19  | .. QMGQMWAIP  | TVATAPF    | LNVG ARPVSSYVSN         |
| BjTCP9a  | .. ATAALPATY  | VAAVQQA    | SSMARPPPPQVVP           |
| BjTCP9c  | .. SAAASPSTY  | DAAVQQA    | PMSRPPPSRVRVPSNGV       |
| BjTCP9b  | .. APP        | .. SSVYAAV | QQAASLMARPPFVSVSTPS     |
| BjTCP9d  | .. APPQ       | .. SSVYAAV | QQAASLMARPPFPRVDPVT     |
| AtTCP9   | .. AAAS       | .. PSSYAAV | QQAASLMARPPPLQVVPSSGFVS |
| AtTCP11  | .. TQTQTPQ    | SPSCR      | LDLQCPIGIQYVNGYSHMP     |
| BjTCP21b | .. QVWSFAAGAT | PEMLFT     | TOQQQ                   |
| BjTCP21d | .. QVWSFAAGAT | PEMLFT     | TOQQQ                   |
| BjTCP21a | .. QVWSFAAGAT | PEMLFT     | TOQQQ                   |
| BjTCP21e | .. QVWSFSGAS  | PEMLF      | QAQQQQQ                 |
| BjTCP21c | .. QVWSFAAGAT | PEMLFT     | TOQQQ                   |
| BjTCP21f | .. QVWSFAAGAT | PEMLFT     | TOQQQ                   |
| AtTCP21  | .. QVWSFATGAP | PEMVFA     | QOQQQ                   |
| BjTCP7a  | .. QVWSFAS    | .. HQEMF   | LQOQQQQQ                |
| BjTCP7e  | .. QVWSFAS    | .. HQEMF   | LQOQQQQQ                |
| BjTCP7b  | .. QVWSFAAGAT | QELFL      | LQOQQQQQ                |
| BjTCP7d  | .. QVWSFAAGAT | QELFL      | LQOQQQQQ                |
| BjTCP7c  | .. QVLSFAAGAP | HEMFL      | LQHQQQE                 |
| AtTCP7   | .. QVWSFAGAP  | QEMFL      | LQOQQHHQ                |
| BjTCP22a | .. PGHQMWAFN  | PGSYPP     | VGTRVVTAP               |
| BjTCP22c | .. PGHQMWAFN  | PGSYPP     | VGTRVVTAP               |
| AtTCP22  | .. PGHQMWAFN  | PGNYPP     | VGTRVVTAP               |
| BjTCP22b | .. PGHQMWAFN  | PGSYPP     | VGTRVVTAP               |
| BjTCP22d | .. PGHQMWAFN  | PGSYPP     | VGTRVVTAP               |
| AtTCP23  | .. PSQHMMWAFN | PGHYPP     | GRIG                    |
| BjTCP8a  | TGFSFPMDQYR   | GSPLQL     | GSFLAQ                  |
| BjTCP8b  | TGFSFPMDQYR   | GSPLQL     | GSFLAQ                  |
| AtTCP8   | TGFSFPMDQYR   | GSPLQL     | GSFLAQ                  |
| BjTCP15a | .. TQNLWAFN   | INPHHS     | GEVYNTSGGGGGGGGGGAGGGG  |
| BjTCP15d | .. TQNLWAFN   | INPHHS     | GDAYNTSGGGGGGGGGG       |
| BjTCP15c | .. TQNLWAFN   | INPHHS     | ADVYNTSGGGGGGGGGG       |
| BjTCP15e | .. TQNLWAFN   | INPHHS     | ADVYNTSGGGGGGGGGG       |
| BjTCP15b | .. TQNLWAFN   | INPHHS     | ADVYNTSGGGGGGGGGG       |
| BjTCP15f | .. TQNLWAFN   | INPHHS     | ADVYNTSGGGGGGGGGG       |
| AtTCP15  | .. TQNLWAFN   | INPHHS     | GVVAGDVYNTSGGGGGGGG     |
| BjTCP14a | .. GGGEVVT    | FPSINT     | AAAAALYRSVVS            |
| BjTCP14b | .. GGGEVVT    | FPSINT     | AAAAALYRSVVS            |
| AtTCP14  | .. GGGEVVT    | FPSINT     | AAAAALYRSVVS            |
| BjTCP20a | .. VQTMDS     | GGGYRIG    | PFDPYGGAMS              |
| BjTCP20c | .. VQTTGLM    | SEGAGYR    | IGPFDPYGGAMS            |
| AtTCP20  | .. VPTTGLM    | SEGAGYR    | IGPFDPYGGAMS            |
| BjTCP20b | .. GVMSE      | GAGYRIG    | PFDPYGGAMS              |
| BjTCP6   | .. GANPT      | GGGFDL     | NCGIGLGFDFNG            |
| AtTCP6   | .. QTI        | GGFDL      | NYGIG                   |
| BjTCP1a  | EIMDPFKRSI    | IFNEGDD    | MTHSFYKEAIEFDNQE        |
| BjTCP1e  | KIMDPFKRSI    | IFNEGDD    | MTHSFYKEAIEFDNQE        |
| BjTCP1b  | ETIDPLKRSI    | IFNEGDD    | MTHSFYKEAIEFDNQE        |
| BjTCP1c  | DIIDPLKRSI    | IFNEGDD    | MTHSFYKEAIEFDNQE        |
| BjTCP1d  | EIVDPFKRSI    | IFNEGDD    | MTHSFYKEAIEFDNQE        |
| AtTCP1   | EIMDPFKRSI    | IFNEGDD    | MTHSFYKEAIEFDNQE        |
| BjTCP12a | SRKTKI        | IGGAQER    | ENLEQER                 |
| BjTCP12b | SRKTKI        | IGGAQER    | ENLEQER                 |
| AtTCP12  | TREIKIT       | NGVQLLE    | KEKKEQEWSTNDVHMVEYQM    |
| BjTCP18a | ABAHNQ        | HDEIV      | KNNKSHVNCKSF            |
| BjTCP18b | EEEVH         | HHHDEI     | VLVKNNK                 |
| BjTCP18c | VEAHNQ        | HDEIQ      | Q                       |
| BjTCP18d | VEAHNQ        | LDEVV      | KNNNTGVNWNNT            |
| AtTCP18  | EEDAH         | DHGEI      | IKNNNRSQVNRSS           |
| BjTCP17a | .. QSLLD      | QSGNVT     | VALS                    |
| BjTCP17b | .. QSLLD      | QSGNVT     | VALS                    |
| AtTCP17  | .. QSLLD      | QSGNVT     | VALS                    |
| BjTCP5c  | .. QHSLD      | QSGNVT     | VALS                    |
| BjTCP5a  | .. QHSLD      | QSGNVT     | VALS                    |
| BjTCP5b  | .. QHSLD      | QSGNVT     | VALS                    |
| AtTCP5   | .. QSLLD      | QSGNVT     | VALS                    |
| BjTCP13a | .. MTTLS      | .. TTTT    | QSLF                    |
| BjTCP13c | .. VTTSS      | .. TTTT    | QSLF                    |
| BjTCP13b | .. MTTSP      | .. TTTT    | QSLF                    |
| AtTCP13  | .. MTTSS      | .. TTTT    | QSLF                    |
| BjTCP24a | .. ETS        | LNHHS      | FVDPY                   |
| BjTCP24b | .. NHHHH      | HFVDP      | Y                       |
| BjTCP24c | .. HHH        | SNQYS      | F                       |
| BjTCP24d | .. HNN        | SNQYS      | F                       |
| AtTCP24  | .. QEP        | MNHP       | F                       |
| BjTCP2a  | .. HHHH       | HQEF       | F                       |
| BjTCP2d  | .. PPH        | HQEF       | F                       |
| BjTCP2b  | .. HHQ        | HQEF       | F                       |
| BjTCP2c  | .. HHQ        | HQEF       | F                       |
| AtTCP2   | .. HHQ        | HQEF       | F                       |
| BjTCP3   | .. HRL        | V          | T                       |
| AtTCP3   | .. KI         | Q          | R                       |
| AtTCP4   | .. RI         | Q          | R                       |
| AtTCP16  | .. DN         | I          | S                       |
| AtTCP10  | .. HHD        | L          | T                       |

BjTCP19 .....TSDAEPQMGTSGGGGDEGTTQTLRDFSLITYDKKELQFLGGSSG
AtTCP19 .....ASDAEAEEMETSGG...GTTQPLRDFSLIYDKKRELQFLGGSSG
BjTCP9a .....NFTGVSVMAPSSSSSS...IATKNMLRDFSLIYDKKELQFLGGSSG
BjTCP9c .....ISVNVVNGSVMAPSSSSSSGIANVAPTMNMLRDFSLIYDKKELQFLGGSSG
BjTCP9b .....VMAPSSSSG...VTNGGSSSSTTNMLRDFSLIYDKKELQFLGGSSG
BjTCP9d .....GSAPSSSSSGITNGGSSSSTTNMLRDFSLIYDKKELQFLGGSSG
AtTCP9 VSDVSGSNLSRATSVMAPSSSSSGVTGSSSSIAITTTHTLRDFSLIYDKKELQFLGGSSG
AtTCP11 .....FTAMLLPEPMTTAESEVEIAEEERRR
BjTCP21b VRQ00000...ASAAVAAMGEASAARVGNYPGHHNLNLLASLSGGSPGSRREEDDSR
BjTCP21d VRQ000000000000ASAAVAAMGEASAARVGNYPGHHNLNLLASLSGGNTGSRREEDDSR
BjTCP21a VRQ000...QQQASAAAAMGEASAARVGNYPGHHNLNLLASLSGGNTGSRREEDNPR
BjTCP21e VRHQ000...QQQQAAMGEASAARVGNYPGHHNLNLLASLSGGNTGSRREEDNPR
BjTCP21f VRHQ000...QQQASVEAAMGEASAARVGNYPGHHNLNLLASLSGGNTGSRREEDNPR
AtTCP21 VRHQ000...QASAAAAAAMGEASAARVGNYPGHHNLNLLASLSGGANGSRREEDNPR
BjTCP7a VHQQ000...QAAMGEASAARVGNYPG...HLNLLASLSGGAPGSRREDDQR
BjTCP7e VHQQ000...QAAMGEASAARVGNYPG...HLNLLASLSGGAPGSRREDDQR
BjTCP7b HQ000000...QAAMGEASAARVGNYPG...HLNLLASLSGGAPGSRREDDQR
BjTCP7d QQQ00000...QAAMGEASAARVGNYPG...HLNLLASLSGGAPGSRREDDQR
BjTCP7c VHQQ000...QGAIGEASAARVGNYPG...HLSLLASLSGGVPASGRREDDQR
AtTCP7 VHQQ000...QAAMGEASAARVGNYPG...HLNLLASLSGGSPGSRREDDQR
BjTCP22a LGG000LG...LGVAEAGNMAAAMRGRGGGG...DGLAMTLDQHQHQHQHQEPNQS
BjTCP22c LGG000LG...LGVAEAGNMAAAMRGRGGGG...DGLAMTLDQHQHQHQHQEP.TTQS
AtTCP22 LGG000LG...LGVAEAGNMAAAMRGRGGGG...LGMTLEQHQHQHQHQEP.NQS
BjTCP22b LGG000LG...LGVAEAGNMAAAMRGRGGGG...LGMTLEQHQHQHQHQEP.NNQ
BjTCP22d LGG000LG...LGVAEAGNMAAAMRGRGGGG...LGMTLEQHQHQHQHQEP.NQ
AtTCP23 VRHQ000...LGVAENNLGLFSGGGGGGRVGLMSLEKQPQHQVSDHATRDQN
BjTCP8a MPDSNLG...VLAALNAAYPRGGNANAEQVNN...AVEHQEKQPPQSDQDDDD
BjTCP8b MPDSNLG...VLAALNAAYSRGGNANAEQVNNNAVEHQEKQPPQSDQDDDD
AtTCP8 MPDSNLG...MLAALNSAYSRRGGNANANAEQAN...NAVEHQEKQPPQSDQDDDD
BjTCP15a SG.QPLASG...YGGGGGGHNNHYGVLAAALNAAYRQVET...ASQNNREGDHH
BjTCP15d SG.QPLASG...YGGGGGGHNNHYGVLAAALNAAYRQVET...ANQNSREGDHH
BjTCP15c SG.QPLASGYGGGGGGGGGGGGHNNHYGVLAAALNAAYRQVET...ANQNNREGDHH
BjTCP15e SG.QPYG...GGGGGGGGHNNHYGVLAAALNAAYRQVET...ANQNNREGDHH
BjTCP15b SG.QPLASG...YGGGGGGGGGGGGHNNHYGVLAAALNAAYRQVET...ANQNNREGDHH
BjTCP15f SG.QPLASG...YGGGGGGGGGGGGHNNHYGVLAAALNAAYRQVET...ANQNNREGDHH
AtTCP15 SG.QPLASG...YGGGGGGGGGGGGHNNHYGVLAAALNAAYRQVETGNH.NNNQNNREGDHH
BjTCP14a TG.QQLATSSNHEINEDNNNNNEGGRSDGG.DHHNTQRHHHQHQHQHQHHHLLSGLNQ
BjTCP14b TG.QQLATSSNHEINEDNNNNNEGGRSDGG.DHHDTQRHHHQHQHQHQHHHLLSGLNQ
AtTCP14 TGQQQLATTSSNHEINEDNNNNNEGGRSDGGDHHNTQRHHHQHQHQHHHLLSGLNQ
BjTCP20a LGLAQEGNVGLNPOSFAQIQOQMSQAQAQGRVLLHHTLQHNP.THEHQESESKEKDDSO
BjTCP20c LGLAQEGNVGLNPOSFALIQOQMGQAQAQGMVLLHHTLHNPSSHEEHQESKEKDDSO
AtTCP20 LGLSQEGNVGLNPOSFTQIQOQM...QAQAQAQGRVLLHHTLHNPSSHEEHQESKEKDDSO
BjTCP20b LGLSQEGNVGLN...QQIQOQMAQAQAQGRVLLHHTLHNP.GHEDHQESESKEKDDSO
BjTCP6 .....QVGV...NPRIYQMGQEQAKVLQHHYHHPHEAQENADKQGS
AtTCP6 IRLS0VGV...NPQVQMGKEQFRVLLHHHS...HEDQESAEBS
BjTCP1a PTDMDSYNQHYGTFFMLKDKGSSSNYNTILPONLDYGDQNPFFMDQLCAVTNRNFRGK
BjTCP1e PTDMDSYNQHYATFFMLKDGSSSNNTTILPONLEYGIDQNPFFMDQCAVTNRNFRGK
BjTCP1b PTNMDQIYNQYGTFFMLKDKGSSSNYNTILPONLDYFDQNSFIDQPFCAVTKTSFFRGN
BjTCP1c PTNMDQSYNQHYGTFFMLKDKGSSSNYNTTPPONLDYFDQNPFFIDQPFCAVTKTSFFRGN
BjTCP1d LINMDQNYNQYRESMLKDKGSSSNYNTILPONLDYFDQNPFFIDQPFCAVTKTSFFRGN
AtTCP1 PTKMGQSYNQNGILMLVDQSSSNYNTFLPONLDYSDQNPFFHDQTLVYVTDKNFPKKG
BjTCP12a GLTSESSSSSTIFGDSEESYTLGSIRESYTVSTAGVVPREHN...TSTASVDEERNPTST
BjTCP12b GLTSESSSSSTIFGDSEESYTLGSIRESYTVSTAGVVPREHN...TSTASVDEERNPTST
AtTCP12 GLTSDSSSSSIFGDSEECYTLSSVRG...MSTPREHN...TSTIATVDEEKSPSS
BjTCP18a VN.....KFNSSFPMPNHHRSQGTVSSIE...QORQFMDLHHFLERPR
BjTCP18b MDKDHISD.....EFNSSFPMLDHHHSQWAASSIE...QORQFMDLHHFLERPR
BjTCP18c VNKKDHISDESYNMI.SKLNSSFPVLTTHRSQGVATSIQQQQQQQQVDRDVHFLERPR
AtTCP18 MNKKDHISNESYDLVNYKPNSSFPVINHHRSQGAANSIE...QHQFTDLHYSGAKPR
BjTCP17a .....
BjTCP17b PRYPLFLGEG...DQLQLFSSSHSNSSKQTDHVE.....
AtTCP17 PTRYPSFLGG...GQLQLFSSSTSSQPDHIE.....
BjTCP5c PTYPSFLGASQQHHVVVDGAGNLQLFSSNANRNNR.....
BjTCP5a PTYPSFLGAS...HHVVVDGAGNLQLFSSNANRNNR.....
BjTCP5b PTYPSFLGAS.HHHVVVDGAGNLQLFSSNANTASQOQMMTGNSSLI RPPHHLMSSNHDT
AtTCP5 PTYPSFLGAS.HHHVVVDGAGHLQLFSSNSNTASQOHHMMPGNTSLIRPPHHLMSSNHDT
BjTCP13a QMPLMGSSSSSASQNIISTLYSLHGGSS...SNRMSVQLNRTNRGSDNHM.....
BjTCP13c QMPLMGSSSSSASQNIISTLYSLHGGSS...SNRMSVQLNRTNRGSDNHM.....
BjTCP13b QMPLMGSSSSS...QNIISTLYSLHGGNSPMPVQFDRK.....
AtTCP13 .....
BjTCP24a SNSHSHFLNNNN.....VNQRPI SFMATPPPLDHHN.HQLPATFDGR
BjTCP24b SNSHSHLLNNNN.....VNQRPI SFMATPPPLDHHSHQOLPATFDGR
BjTCP24c SNSQSLFLNNNNN.INORSISSSSSSSPMDSQISIFFMAPP.LHHHTHQFPAVDGR
BjTCP24d SNSQSLFLNNNNN.ITORSISSSSSSSPMDSQISIFFMAPP.LHHHTHQFPAVDGR
AtTCP24 SNSQSLFLNNNNN.ITORSISSSSSSSPMDSQISIFFMATPPPLDHHHQLPETFDGR
BjTCP2a SNSSNHHHHHQO.QQOSSLANLQRLSSSEGGGGPOFLG.ALPAENHHHNN...HO
BjTCP2d SNSSTNHHHHH...SFLANLQRFPSSEGGGGPOFLG.ALPAENHHHNN...HO
BjTCP2b SNSSTNHHHHH...QSFANLQRFPSSEGGGGPOFLGNGALPAENHHHNNNN...HO
AtTCP2c SNSSTNHHHQH...QSFANLQRFPSSEGGGGPOFLG.MPAENQHPPHHNNNNHO
BjTCP2 SNSSTNHQHSP...LANLQRFPSSEGGGGPOFLG.ALPAENHHHNN...Q
BjTCP3 SINTPMLRWFDPYHHH...QSIITNDHHHHHPYQS...AIPGIAFASGGELSGL
AtTCP3 SINTPMIRAWFDPHHHHHHHQSMDDDLHHHHHPYHPPGIHQSAIPGIAFASGGELSGF
AtTCP4 SSSYPMIRAWFDPHHHH...QSIITDDLNHHHHLP...VHQSAIPGIAFASGGELSGF
BjTCP16 .....TMDHAPSTNYSTISDNYNSTFNAGNATASDSTSAATTATTTV
AtTCP10 QQQQRGTQLQSSLFPFSFRSVDHHTTSDHHHHHQNQASMPASSQYSGHMMMQGLSFP

BjTCP19 DNTSPS.....  
AtTCP19 NSSPSSCHET.....  
BjTCP9a AAPRSSNH.....  
BjTCP9c TARSSANR.....  
BjTCP9b TARSSSNH.....  
BjTCP9d TARSSSNH.....  
AtTCP9 TARSSNH.....  
AtTCP11 RRHH.....  
BjTCP21b .....  
BjTCP21d .....  
BjTCP21a .....  
BjTCP21e .....  
BjTCP21c .....  
BjTCP21f .....  
AtTCP21 .....  
BjTCP7a .....  
BjTCP7e .....  
BjTCP7b .....  
BjTCP7d .....  
BjTCP7c .....  
AtTCP7 .....  
BjTCP22a QAS.ENGDDDKK.....  
BjTCP22c QVS.ENGDDDKK.....  
AtTCP22 QAS.ENGDDDKK.....  
BjTCP22b AEASENGDDDKK.....  
BjTCP22d AEASENGDDDTK.....  
AtTCP23 PTIDGSP.....  
BjTCP8a SRDENSNSDG.....  
BjTCP8b SRDENSNSDG.....  
AtTCP8 SREENSNSSE.....  
BjTCP15a HSHQEDGSTSHHS.....  
BjTCP15d HNHQEDGSTSHHS.....  
BjTCP15c HSHQEDGSTSHHS.....  
BjTCP15e HSHQEDGSTSHHS.....  
BjTCP15b HNHQEDGSTSHHS.....  
BjTCP15f HNHQEDGSTSHHS.....  
AtTCP15 HNHQEDGSTSHHS.....  
BjTCP14a YGRQVSGESQASDSLGGGEEDPOD.....  
BjTCP14b YGRQVSGESQASDSLGGGEEDPOD.....  
AtTCP14 YGRQVSGDSQASGSLGGGEEDQOD.....  
BjTCP20a GSGR.....  
BjTCP20c GSGR.....  
AtTCP20 GSGR.....  
BjTCP20b GSF.....  
BjTCP6 INLWFSLLRYAYIVCEMSEIYAFGGISSLVLLGYAFCGKMCLFYSLVCLNSLSMALMYLI.....  
AtTCP6 .....  
BjTCP1a VLVQDSSLA.....  
BjTCP1e VWIQDYLL.....  
BjTCP1b V.....  
BjTCP1c .....  
BjTCP1d .....  
AtTCP1 VWIQDSFVN.....  
BjTCP12a FSLYDYLCY.....  
BjTCP12b FSLYDYLCY.....  
AtTCP12 FSLYDYLCY.....  
BjTCP18a DLMYNYHNM.....  
BjTCP18d DLVYNYHSMC.....  
BjTCP18b NM.....  
BjTCP18c DFMYNYHNM.....  
AtTCP18 DLMHNYQNM.....  
BjTCP17a .....  
BjTCP17b .....  
AtTCP17 .....  
BjTCP5c .....  
BjTCP5a .....  
BjTCP5b RHSSDDNDSDS.....  
AtTCP5 HHSSDNESDS.....  
BjTCP13a .....  
BjTCP13c .....  
BjTCP13b .....  
AtTCP13 .....  
BjTCP24a LYLYYEGGNRSDDKKGKDG.....  
BjTCP24b LYLYYEGGNRSDDKAKDGS.....  
BjTCP24c LYLYYEGGNRSDDKKGKERR.....  
BjTCP24d LYLYYEGGKKGKDKOR.....  
AtTCP24 LYLYYEGGNRSDDKAKERR.....  
BjTCP2a FQLYYENGCRNS.DOKGKGN.....  
BjTCP2d FQLYYENGCRNS.DOKGKGN.....  
BjTCP2b FQLYYENGCRNS.DOKGKGN.....  
BjTCP2c FQLYYENGCRNS.DOKGKGN.....  
AtTCP2 FQLYYENGCRNSSEHKGKGN.....  
BjTCP3 RVPVRYQS.EQDDHG.DNPPSASSDSRH.....  
AtTCP3 RIPARFQG.EQEEHGGDNKPSSASSDSRH.....  
AtTCP4 RIPARFQGEQEEHDGLTHKPPSASSISRH.....  
AtTCP16 .....  
AtTCP10 NITRLLHGEEATQPNSSSSPPNSHL.....

BjTCP19 .....  
AtTCP19 .....  
BjTCP9a .....  
BjTCP9c .....  
BjTCP9b .....  
BjTCP9d .....  
AtTCP9 .....  
AtTCP11 .....  
BjTCP21b .....  
BjTCP21d .....  
BjTCP21a .....  
BjTCP21e .....  
BjTCP21c .....  
BjTCP21f .....  
AtTCP21 .....  
BjTCP7a .....  
BjTCP7e .....  
BjTCP7b .....  
BjTCP7d .....  
BjTCP7c .....  
AtTCP7 .....  
BjTCP22a .....  
BjTCP22c .....  
AtTCP22 .....  
BjTCP22b .....  
BjTCP22d .....  
AtTCP23 .....  
BjTCP8a .....  
BjTCP8b .....  
AtTCP8 .....  
BjTCP15a .....  
BjTCP15d .....  
BjTCP15c .....  
BjTCP15e .....  
BjTCP15b .....  
BjTCP15f .....  
AtTCP15 .....  
BjTCP14a .....  
BjTCP14b .....  
AtTCP14 .....  
BjTCP20a .....  
BjTCP20c .....  
AtTCP20 .....  
BjTCP20b .....  
BjTCP6 .....  
AtTCP6 .....  
BjTCP1a .....  
BjTCP1e .....  
BjTCP1b .....  
BjTCP1c .....  
BjTCP1d .....  
AtTCP1 .....  
BjTCP12a .....  
BjTCP12b .....  
AtTCP12 .....  
BjTCP18a .....  
BjTCP18d .....  
BjTCP18b .....  
BjTCP18c .....  
AtTCP18 .....  
BjTCP17a .....  
BjTCP17b .....  
AtTCP17 .....  
BjTCP5c .....  
BjTCP5a .....  
BjTCP5b .....  
AtTCP5 .....  
BjTCP13a .....  
BjTCP13c .....  
BjTCP13b .....  
AtTCP13 .....  
BjTCP24a .....  
BjTCP24b .....  
BjTCP24c .....  
BjTCP24d .....  
AtTCP24 .....  
BjTCP2a .....  
BjTCP2d .....  
BjTCP2b .....  
BjTCP2c .....  
AtTCP2 .....  
BjTCP3 .....  
AtTCP3 .....  
AtTCP4 .....  
AtTCP16 .....  
AtTCP10 .....

BjTCP19 .....  
 AtTCP19 .....  
 BjTCP9a .....  
 BjTCP9c .....  
 BjTCP9b .....  
 BjTCP9d .....  
 AtTCP9 .....  
 AtTCP11 .....  
 BjTCP21b .....  
 BjTCP21d .....  
 BjTCP21a .....  
 BjTCP21e .....  
 BjTCP21c .....  
 BjTCP21f .....  
 AtTCP21 .....  
 BjTCP7a .....  
 BjTCP7e .....  
 BjTCP7b .....  
 BjTCP7d .....  
 BjTCP7c .....  
 AtTCP7 .....  
 BjTCP22a .....  
 BjTCP22c .....  
 AtTCP22 .....  
 BjTCP22b .....  
 BjTCP22d .....  
 AtTCP23 .....  
 BjTCP8a .....  
 BjTCP8b .....  
 AtTCP8 .....  
 BjTCP15a .....  
 BjTCP15d .....  
 BjTCP15c .....  
 BjTCP15e .....  
 BjTCP15b .....  
 BjTCP15f .....  
 AtTCP15 .....  
 BjTCP14a .....  
 BjTCP14b .....  
 AtTCP14 .....  
 BjTCP20a .....  
 BjTCP20c .....  
 AtTCP20 .....  
 BjTCP20b .....  
 BjTCP6 .....  
 AtTCP6 .....  
 BjTCP1a .....  
 BjTCP1e .....  
 BjTCP1b .....  
 BjTCP1c .....  
 BjTCP1d .....  
 AtTCP1 .....  
 BjTCP12a .....  
 BjTCP12b .....  
 AtTCP12 .....  
 BjTCP18a .....  
 BjTCP18d .....  
 BjTCP18b .....  
 BjTCP18c .....  
 AtTCP18 .....  
 BjTCP17a .....  
 BjTCP17b .....  
 AtTCP17 .....  
 BjTCP5c .....  
 BjTCP5a .....  
 BjTCP5b .....  
 AtTCP5 .....  
 BjTCP13a .....  
 BjTCP13c .....  
 BjTCP13b .....  
 AtTCP13 .....  
 BjTCP24a .....  
 BjTCP24b .....  
 BjTCP24c .....  
 BjTCP24d .....  
 AtTCP24 .....  
 BjTCP2a .....  
 BjTCP2d .....  
 BjTCP2b .....  
 BjTCP2c .....  
 AtTCP2 .....  
 BjTCP3 .....  
 AtTCP3 .....  
 AtTCP4 .....  
 AtTCP16 .....  
 AtTCP10 .....

QTMKWP SNAIANYKCENIITLNSPLNIKSEFKIIYYPLALGVCFGDLITQLTESSTFTCI

BjTCP19 .....  
 AtTCP19 .....  
 BjTCP9a .....  
 BjTCP9c .....  
 BjTCP9b .....  
 BjTCP9d .....  
 AtTCP9 .....  
 AtTCP11 .....  
 BjTCP21b .....  
 BjTCP21d .....  
 BjTCP21a .....  
 BjTCP21e .....  
 BjTCP21c .....  
 BjTCP21f .....  
 AtTCP21 .....  
 BjTCP7a .....  
 BjTCP7e .....  
 BjTCP7b .....  
 BjTCP7d .....  
 BjTCP7c .....  
 AtTCP7 .....  
 BjTCP22a .....  
 BjTCP22c .....  
 AtTCP22 .....  
 BjTCP22b .....  
 BjTCP22d .....  
 AtTCP23 .....  
 BjTCP8a .....  
 BjTCP8b .....  
 AtTCP8 .....  
 BjTCP15a .....  
 BjTCP15d .....  
 BjTCP15c .....  
 BjTCP15e .....  
 BjTCP15b .....  
 BjTCP15f .....  
 AtTCP15 .....  
 BjTCP14a .....  
 BjTCP14b .....  
 AtTCP14 .....  
 BjTCP20a .....  
 BjTCP20c .....  
 AtTCP20 .....  
 BjTCP20b .....  
 BjTCP6 .....  
 AtTCP6 .....  
 BjTCP1a .....  
 BjTCP1e .....  
 BjTCP1b .....  
 BjTCP1c .....  
 BjTCP1d .....  
 AtTCP1 .....  
 BjTCP12a .....  
 BjTCP12b .....  
 AtTCP12 .....  
 BjTCP18a .....  
 BjTCP18d .....  
 BjTCP18b .....  
 BjTCP18c .....  
 AtTCP18 .....  
 BjTCP17a .....  
 BjTCP17b .....  
 AtTCP17 .....  
 BjTCP5c .....  
 BjTCP5a .....  
 BjTCP5b .....  
 AtTCP5 .....  
 BjTCP13a .....  
 BjTCP13c .....  
 BjTCP13b .....  
 AtTCP13 .....  
 BjTCP24a .....  
 BjTCP24b .....  
 BjTCP24c .....  
 BjTCP24d .....  
 AtTCP24 .....  
 BjTCP2a .....  
 BjTCP2d .....  
 BjTCP2b .....  
 BjTCP2c .....  
 AtTCP2 .....  
 BjTCP3 .....  
 AtTCP3 .....  
 AtTCP4 .....  
 AtTCP16 .....  
 AtTCP10 .....

VCLSFDLSGYICGRISFAALWDKSAVNILASITRKLQLRKLNVNNEYVVGENSESLLGNSCT

BjTCP19 .....  
 AtTCP19 .....  
 BjTCP9a .....  
 BjTCP9c .....  
 BjTCP9b .....  
 BjTCP9d .....  
 AtTCP9 .....  
 AtTCP11 .....  
 BjTCP21b .....  
 BjTCP21d .....  
 BjTCP21a .....  
 BjTCP21e .....  
 BjTCP21c .....  
 BjTCP21f .....  
 AtTCP21 .....  
 BjTCP7a .....  
 BjTCP7e .....  
 BjTCP7b .....  
 BjTCP7d .....  
 BjTCP7c .....  
 AtTCP7 .....  
 BjTCP22a .....  
 BjTCP22c .....  
 AtTCP22 .....  
 BjTCP22b .....  
 BjTCP22d .....  
 AtTCP23 .....  
 BjTCP8a .....  
 BjTCP8b .....  
 AtTCP8 .....  
 BjTCP15a .....  
 BjTCP15d .....  
 BjTCP15c .....  
 BjTCP15e .....  
 BjTCP15b .....  
 BjTCP15f .....  
 AtTCP15 .....  
 BjTCP14a .....  
 BjTCP14b .....  
 AtTCP14 .....  
 BjTCP20a .....  
 BjTCP20c .....  
 AtTCP20 .....  
 BjTCP20b .....  
 BjTCP6 TFEALSAFVWRARTKSLKMLNDQKTKLLFAVDGRAKFEPLPKGYFGNGIVLINSICEAG  
 AtTCP6 .....  
 BjTCP1a .....  
 BjTCP1e .....  
 BjTCP1b .....  
 BjTCP1c .....  
 BjTCP1d .....  
 AtTCP1 .....  
 BjTCP12a .....  
 BjTCP12b .....  
 AtTCP12 .....  
 BjTCP18a .....  
 BjTCP18d .....  
 BjTCP18b .....  
 BjTCP18c .....  
 AtTCP18 .....  
 BjTCP17a .....  
 BjTCP17b .....  
 AtTCP17 .....  
 BjTCP5c .....  
 BjTCP5a .....  
 BjTCP5b .....  
 AtTCP5 .....  
 BjTCP13a .....  
 BjTCP13c .....  
 BjTCP13b .....  
 AtTCP13 .....  
 BjTCP24a .....  
 BjTCP24b .....  
 BjTCP24c .....  
 BjTCP24d .....  
 AtTCP24 .....  
 BjTCP2a .....  
 BjTCP2d .....  
 BjTCP2b .....  
 BjTCP2c .....  
 AtTCP2 .....  
 BjTCP3 .....  
 AtTCP3 .....  
 AtTCP4 .....  
 AtTCP16 .....  
 AtTCP10 .....

BjTCP19 .....  
 AtTCP19 .....  
 BjTCP9a .....  
 BjTCP9c .....  
 BjTCP9b .....  
 BjTCP9d .....  
 AtTCP9 .....  
 AtTCP11 .....  
 BjTCP21b .....  
 BjTCP21d .....  
 BjTCP21a .....  
 BjTCP21e .....  
 BjTCP21c .....  
 BjTCP21f .....  
 AtTCP21 .....  
 BjTCP7a .....  
 BjTCP7e .....  
 BjTCP7b .....  
 BjTCP7d .....  
 BjTCP7c .....  
 AtTCP7 .....  
 BjTCP22a .....  
 BjTCP22c .....  
 AtTCP22 .....  
 BjTCP22b .....  
 BjTCP22d .....  
 AtTCP23 .....  
 BjTCP8a .....  
 BjTCP8b .....  
 AtTCP8 .....  
 BjTCP15a .....  
 BjTCP15d .....  
 BjTCP15c .....  
 BjTCP15e .....  
 BjTCP15b .....  
 BjTCP15f .....  
 AtTCP15 .....  
 BjTCP14a .....  
 BjTCP14b .....  
 AtTCP14 .....  
 BjTCP20a .....  
 BjTCP20c .....  
 AtTCP20 .....  
 BjTCP20b .....  
 BjTCP6 ..... ELTEKPLSFAVGLVREAIRMVTDGYMRSALDYFEVTRARPSLSSTLLITW SRLGFHTTD  
 AtTCP6 .....  
 BjTCP1a .....  
 BjTCP1e .....  
 BjTCP1b .....  
 BjTCP1c .....  
 BjTCP1d .....  
 AtTCP1 .....  
 BjTCP12a .....  
 BjTCP12b .....  
 AtTCP12 .....  
 BjTCP18a .....  
 BjTCP18d .....  
 BjTCP18b .....  
 BjTCP18c .....  
 AtTCP18 .....  
 BjTCP17a .....  
 BjTCP17b .....  
 AtTCP17 .....  
 BjTCP5c .....  
 BjTCP5a .....  
 BjTCP5b .....  
 AtTCP5 .....  
 BjTCP13a .....  
 BjTCP13c .....  
 BjTCP13b .....  
 AtTCP13 .....  
 BjTCP24a .....  
 BjTCP24b .....  
 BjTCP24c .....  
 BjTCP24d .....  
 AtTCP24 .....  
 BjTCP2a .....  
 BjTCP2d .....  
 BjTCP2b .....  
 BjTCP2c .....  
 AtTCP2 .....  
 BjTCP3 .....  
 AtTCP3 .....  
 AtTCP4 .....  
 AtTCP16 .....  
 AtTCP10 .....



BjTCP19 .....  
 AtTCP19 .....  
 BjTCP9a .....  
 BjTCP9c .....  
 BjTCP9b .....  
 BjTCP9d .....  
 AtTCP9 .....  
 AtTCP11 .....  
 BjTCP21b .....  
 BjTCP21d .....  
 BjTCP21a .....  
 BjTCP21e .....  
 BjTCP21c .....  
 BjTCP21f .....  
 AtTCP21 .....  
 BjTCP7a .....  
 BjTCP7e .....  
 BjTCP7b .....  
 BjTCP7d .....  
 BjTCP7c .....  
 AtTCP7 .....  
 BjTCP22a .....  
 BjTCP22c .....  
 AtTCP22 .....  
 BjTCP22b .....  
 BjTCP22d .....  
 AtTCP23 .....  
 BjTCP8a .....  
 BjTCP8b .....  
 AtTCP8 .....  
 BjTCP15a .....  
 BjTCP15d .....  
 BjTCP15c .....  
 BjTCP15e .....  
 BjTCP15b .....  
 BjTCP15f .....  
 AtTCP15 .....  
 BjTCP14a .....  
 BjTCP14b .....  
 AtTCP14 .....  
 BjTCP20a .....  
 BjTCP20c .....  
 AtTCP20 .....  
 BjTCP20b .....  
 BjTCP6 FGWGEPVLSGPFVALPEKEVTLFLSHGEERRSINVLLGLPASAMDVFQELFLQI  
 AtTCP6 .....  
 BjTCP1a .....  
 BjTCP1e .....  
 BjTCP1b .....  
 BjTCP1c .....  
 BjTCP1d .....  
 AtTCP1 .....  
 BjTCP12a .....  
 BjTCP12b .....  
 AtTCP12 .....  
 BjTCP18a .....  
 BjTCP18d .....  
 BjTCP18b .....  
 BjTCP18c .....  
 AtTCP18 .....  
 BjTCP17a .....  
 BjTCP17b .....  
 AtTCP17 .....  
 BjTCP5c .....  
 BjTCP5a .....  
 BjTCP5b .....  
 AtTCP5 .....  
 BjTCP13a .....  
 BjTCP13c .....  
 BjTCP13b .....  
 AtTCP13 .....  
 BjTCP24a .....  
 BjTCP24b .....  
 BjTCP24c .....  
 BjTCP24d .....  
 AtTCP24 .....  
 BjTCP2a .....  
 BjTCP2d .....  
 BjTCP2b .....  
 BjTCP2c .....  
 AtTCP2 .....  
 BjTCP3 .....  
 AtTCP3 .....  
 AtTCP4 .....  
 AtTCP16 .....  
 AtTCP10 .....
