# Supplementary material for: Genome-wide identification and characterization of TCP family genes in Brassica juncea var. tumida
Source: PeerJ. 2020 May 14;8:e9130. doi: 10.7717/peerj.9130 (PMC7231505; doi:10.7717/peerj.9130)
Supplement: Table S1 [file peerj-08-9130-s004.xlsx]

## Sheet: Sheet1
name	sequence (5`-3`)
qBjTCP19-F	GGGAAACGGAGGAGGAGA
qBjTCP19-R	TGATTCGGCCCACCAGTA
qBjTCP1a-F	AGGAGGGTAAGGCTTTCTAT
qBjTCP1a-R	TATCGCCATCTTCTTCATCG
qBjTCP15a-F	CATAAGTCCGACGGTGAAAC
qBjTCP15a-R	CATCGTAGGCGAGTGAAAGTA
qBjTCP22a-F	TGGGTTTCACCATCAGGGCTAC
qBjTCP22a-R	AGGTTGAGGCACCACATTCG
qBjTCP12a-F	CAAAGGGAAGAACAAAG
qBjTCP12a-R	CAAAGATGGTAGAGGAGC
qBjTCP17a-F	AACTGATACGACCCAGAAAG
qBjTCP17a-R	ATTATTGGACAATGCGACA
qBjTCP21a-F	AATAGCCGCCACAGGAACA
qBjTCP21a-R	CCCACCACCACTCATCAAAG
qBjTCP9a-F	ACCAAGGTAGAAGGAAGAGGGAG
qBjTCP9a-R	AGCATCAGCGTTCGTCGTG
qBjTCP13a-F	GGTTCCTGGACTATGGAGACA
qBjTCP13a-R	TGGACTGACGACATTCGGTTA
qBjTCP18a-F	TCGTCGCCTCTTTCCTCC
qBjTCP18a-R	ATCCGTTCTGCTTGGTTTCT
qBjTCP14a-F	TGGTGGGTTTCTTCATCC
qBjTCP14a-R	GACTTAACTCTTCCGAATCTTG
qBjTCP7a-F	TCCACCACTATCTCCACTTCCA
qBjTCP7a-R	TGTCGTCTTTACCGCCTCC
qBjTCP20a-F	CCGACAAAGAACCGAACA
qBjTCP20a-R	TGAGGCTAAAGCAGAGGC
qBjTCP8b-F	GTCCGCTTCAGTTAGGTTCCTTCTT
qBjTCP8b-R	TCTTGATGTTCCACCGCATTGTT
qBjTCP24a-F	GCTGTCTAAATCGGCTTGTA
qBjTCP24a-R	CTTTGTCCTTGGCTGTTCTC
qBjTCP5a-F	TCTCCCTCCTTTACAGTTCC
qBjTCP5a-R	CTTGTTTGATCCATTTCCCT
qBjActin-F	GGCTACTCTTTCACCACGAC
qBjActin-R	GGATACCAGCATTCTCCATAC
