# Supplementary material for: Genome-wide identification and characterization of TCP family genes in Brassica juncea var. tumida
Source: PeerJ. 2020 May 14;8:e9130. doi: 10.7717/peerj.9130 (PMC7231505; doi:10.7717/peerj.9130)
Supplement: Table S2 [file peerj-08-9130-s005.xls]

## Sheet: GO ananation
#Term	Database	ID	Input number	Background number	P-Value	Corrected P-Value	Input
binding	Gene Ontology	GO:0005488	62	9385	2.89365e-34	1.15483e-33	BjTCP19|BjTCP15a|BjTCP15c|BjTCP15b|BjTCP15e|BjTCP13b|BjTCP13a|BjTCP8a|BjTCP15f|BjTCP2d|BjTCP8b|BjTCP2a|BjTCP2b|BjTCP2c|BjTCP7c|BjTCP7b|BjTCP7a|BjTCP7e|BjTCP7d|BjTCP5a|BjTCP17a|BjTCP5c|BjTCP5b|BjTCP21f|BjTCP17b|BjTCP21d|BjTCP21e|BjTCP21b|BjTCP21c|BjTCP21a|BjTCP9a|BjTCP24d|BjTCP9c|BjTCP9b|BjTCP24a|BjTCP9d|BjTCP24c|BjTCP24b|BjTCP20a|BjTCP13c|BjTCP20c|BjTCP20b|BjTCP12a|BjTCP12b|BjTCP15d|BjTCP1a|BjTCP…
biological regulation	Gene Ontology	GO:0065007	62	5631	5.84413e-48	2.72934e-47	BjTCP19|BjTCP15a|BjTCP15c|BjTCP15b|BjTCP15e|BjTCP13b|BjTCP13a|BjTCP8a|BjTCP15f|BjTCP2d|BjTCP8b|BjTCP2a|BjTCP2b|BjTCP2c|BjTCP7c|BjTCP7b|BjTCP7a|BjTCP7e|BjTCP7d|BjTCP5a|BjTCP17a|BjTCP5c|BjTCP5b|BjTCP21f|BjTCP17b|BjTCP21d|BjTCP21e|BjTCP21b|BjTCP21c|BjTCP21a|BjTCP9a|BjTCP24d|BjTCP9c|BjTCP9b|BjTCP24a|BjTCP9d|BjTCP24c|BjTCP24b|BjTCP20a|BjTCP13c|BjTCP20c|BjTCP20b|BjTCP12a|BjTCP12b|BjTCP15d|BjTCP1a|BjTCP…
cellular anatomical entity	Gene Ontology	GO:0110165	62	20476	2.62376e-13	5.93727e-13	BjTCP19|BjTCP15a|BjTCP15c|BjTCP15b|BjTCP15e|BjTCP13b|BjTCP13a|BjTCP8a|BjTCP15f|BjTCP2d|BjTCP8b|BjTCP2a|BjTCP2b|BjTCP2c|BjTCP7c|BjTCP7b|BjTCP7a|BjTCP7e|BjTCP7d|BjTCP5a|BjTCP17a|BjTCP5c|BjTCP5b|BjTCP21f|BjTCP17b|BjTCP21d|BjTCP21e|BjTCP21b|BjTCP21c|BjTCP21a|BjTCP9a|BjTCP24d|BjTCP9c|BjTCP9b|BjTCP24a|BjTCP9d|BjTCP24c|BjTCP24b|BjTCP20a|BjTCP13c|BjTCP20c|BjTCP20b|BjTCP12a|BjTCP12b|BjTCP15d|BjTCP1a|BjTCP…
cellular process	Gene Ontology	GO:0009987	62	11150	1.22269e-29	4.06636e-29	BjTCP19|BjTCP15a|BjTCP15c|BjTCP15b|BjTCP15e|BjTCP13b|BjTCP13a|BjTCP8a|BjTCP15f|BjTCP2d|BjTCP8b|BjTCP2a|BjTCP2b|BjTCP2c|BjTCP7c|BjTCP7b|BjTCP7a|BjTCP7e|BjTCP7d|BjTCP5a|BjTCP17a|BjTCP5c|BjTCP5b|BjTCP21f|BjTCP17b|BjTCP21d|BjTCP21e|BjTCP21b|BjTCP21c|BjTCP21a|BjTCP9a|BjTCP24d|BjTCP9c|BjTCP9b|BjTCP24a|BjTCP9d|BjTCP24c|BjTCP24b|BjTCP20a|BjTCP13c|BjTCP20c|BjTCP20b|BjTCP12a|BjTCP12b|BjTCP15d|BjTCP1a|BjTCP…
DNA binding	Gene Ontology	GO:0003677	62	2041	5.03504e-75	1.57884e-73	BjTCP19|BjTCP15a|BjTCP15c|BjTCP15b|BjTCP15e|BjTCP13b|BjTCP13a|BjTCP8a|BjTCP15f|BjTCP2d|BjTCP8b|BjTCP2a|BjTCP2b|BjTCP2c|BjTCP7c|BjTCP7b|BjTCP7a|BjTCP7e|BjTCP7d|BjTCP5a|BjTCP17a|BjTCP5c|BjTCP5b|BjTCP21f|BjTCP17b|BjTCP21d|BjTCP21e|BjTCP21b|BjTCP21c|BjTCP21a|BjTCP9a|BjTCP24d|BjTCP9c|BjTCP9b|BjTCP24a|BjTCP9d|BjTCP24c|BjTCP24b|BjTCP20a|BjTCP13c|BjTCP20c|BjTCP20b|BjTCP12a|BjTCP12b|BjTCP15d|BjTCP1a|BjTCP…
DNA-binding transcription factor activity	Gene Ontology	GO:0003700	62	1439	2.8919e-84	3.17386e-82	BjTCP19|BjTCP15a|BjTCP15c|BjTCP15b|BjTCP15e|BjTCP13b|BjTCP13a|BjTCP8a|BjTCP15f|BjTCP2d|BjTCP8b|BjTCP2a|BjTCP2b|BjTCP2c|BjTCP7c|BjTCP7b|BjTCP7a|BjTCP7e|BjTCP7d|BjTCP5a|BjTCP17a|BjTCP5c|BjTCP5b|BjTCP21f|BjTCP17b|BjTCP21d|BjTCP21e|BjTCP21b|BjTCP21c|BjTCP21a|BjTCP9a|BjTCP24d|BjTCP9c|BjTCP9b|BjTCP24a|BjTCP9d|BjTCP24c|BjTCP24b|BjTCP20a|BjTCP13c|BjTCP20c|BjTCP20b|BjTCP12a|BjTCP12b|BjTCP15d|BjTCP1a|BjTCP…
heterocyclic compound binding	Gene Ontology	GO:1901363	62	5527	1.85173e-48	9.45244e-48	BjTCP19|BjTCP15a|BjTCP15c|BjTCP15b|BjTCP15e|BjTCP13b|BjTCP13a|BjTCP8a|BjTCP15f|BjTCP2d|BjTCP8b|BjTCP2a|BjTCP2b|BjTCP2c|BjTCP7c|BjTCP7b|BjTCP7a|BjTCP7e|BjTCP7d|BjTCP5a|BjTCP17a|BjTCP5c|BjTCP5b|BjTCP21f|BjTCP17b|BjTCP21d|BjTCP21e|BjTCP21b|BjTCP21c|BjTCP21a|BjTCP9a|BjTCP24d|BjTCP9c|BjTCP9b|BjTCP24a|BjTCP9d|BjTCP24c|BjTCP24b|BjTCP20a|BjTCP13c|BjTCP20c|BjTCP20b|BjTCP12a|BjTCP12b|BjTCP15d|BjTCP1a|BjTCP…
intracellular	Gene Ontology	GO:0005622	62	17437	1.25945e-17	3.14146e-17	BjTCP19|BjTCP15a|BjTCP15c|BjTCP15b|BjTCP15e|BjTCP13b|BjTCP13a|BjTCP8a|BjTCP15f|BjTCP2d|BjTCP8b|BjTCP2a|BjTCP2b|BjTCP2c|BjTCP7c|BjTCP7b|BjTCP7a|BjTCP7e|BjTCP7d|BjTCP5a|BjTCP17a|BjTCP5c|BjTCP5b|BjTCP21f|BjTCP17b|BjTCP21d|BjTCP21e|BjTCP21b|BjTCP21c|BjTCP21a|BjTCP9a|BjTCP24d|BjTCP9c|BjTCP9b|BjTCP24a|BjTCP9d|BjTCP24c|BjTCP24b|BjTCP20a|BjTCP13c|BjTCP20c|BjTCP20b|BjTCP12a|BjTCP12b|BjTCP15d|BjTCP1a|BjTCP…
intracellular membrane-bounded organelle	Gene Ontology	GO:0043231	62	15757	2.38486e-20	6.62628e-20	BjTCP19|BjTCP15a|BjTCP15c|BjTCP15b|BjTCP15e|BjTCP13b|BjTCP13a|BjTCP8a|BjTCP15f|BjTCP2d|BjTCP8b|BjTCP2a|BjTCP2b|BjTCP2c|BjTCP7c|BjTCP7b|BjTCP7a|BjTCP7e|BjTCP7d|BjTCP5a|BjTCP17a|BjTCP5c|BjTCP5b|BjTCP21f|BjTCP17b|BjTCP21d|BjTCP21e|BjTCP21b|BjTCP21c|BjTCP21a|BjTCP9a|BjTCP24d|BjTCP9c|BjTCP9b|BjTCP24a|BjTCP9d|BjTCP24c|BjTCP24b|BjTCP20a|BjTCP13c|BjTCP20c|BjTCP20b|BjTCP12a|BjTCP12b|BjTCP15d|BjTCP1a|BjTCP…
intracellular organelle	Gene Ontology	GO:0043229	62	16019	6.61637e-20	1.77109e-19	BjTCP19|BjTCP15a|BjTCP15c|BjTCP15b|BjTCP15e|BjTCP13b|BjTCP13a|BjTCP8a|BjTCP15f|BjTCP2d|BjTCP8b|BjTCP2a|BjTCP2b|BjTCP2c|BjTCP7c|BjTCP7b|BjTCP7a|BjTCP7e|BjTCP7d|BjTCP5a|BjTCP17a|BjTCP5c|BjTCP5b|BjTCP21f|BjTCP17b|BjTCP21d|BjTCP21e|BjTCP21b|BjTCP21c|BjTCP21a|BjTCP9a|BjTCP24d|BjTCP9c|BjTCP9b|BjTCP24a|BjTCP9d|BjTCP24c|BjTCP24b|BjTCP20a|BjTCP13c|BjTCP20c|BjTCP20b|BjTCP12a|BjTCP12b|BjTCP15d|BjTCP1a|BjTCP…
membrane-bounded organelle	Gene Ontology	GO:0043227	62	15953	5.12472e-20	1.38874e-19	BjTCP19|BjTCP15a|BjTCP15c|BjTCP15b|BjTCP15e|BjTCP13b|BjTCP13a|BjTCP8a|BjTCP15f|BjTCP2d|BjTCP8b|BjTCP2a|BjTCP2b|BjTCP2c|BjTCP7c|BjTCP7b|BjTCP7a|BjTCP7e|BjTCP7d|BjTCP5a|BjTCP17a|BjTCP5c|BjTCP5b|BjTCP21f|BjTCP17b|BjTCP21d|BjTCP21e|BjTCP21b|BjTCP21c|BjTCP21a|BjTCP9a|BjTCP24d|BjTCP9c|BjTCP9b|BjTCP24a|BjTCP9d|BjTCP24c|BjTCP24b|BjTCP20a|BjTCP13c|BjTCP20c|BjTCP20b|BjTCP12a|BjTCP12b|BjTCP15d|BjTCP1a|BjTCP…
nucleic acid binding	Gene Ontology	GO:0003676	62	3147	1.65081e-63	1.44941e-62	BjTCP19|BjTCP15a|BjTCP15c|BjTCP15b|BjTCP15e|BjTCP13b|BjTCP13a|BjTCP8a|BjTCP15f|BjTCP2d|BjTCP8b|BjTCP2a|BjTCP2b|BjTCP2c|BjTCP7c|BjTCP7b|BjTCP7a|BjTCP7e|BjTCP7d|BjTCP5a|BjTCP17a|BjTCP5c|BjTCP5b|BjTCP21f|BjTCP17b|BjTCP21d|BjTCP21e|BjTCP21b|BjTCP21c|BjTCP21a|BjTCP9a|BjTCP24d|BjTCP9c|BjTCP9b|BjTCP24a|BjTCP9d|BjTCP24c|BjTCP24b|BjTCP20a|BjTCP13c|BjTCP20c|BjTCP20b|BjTCP12a|BjTCP12b|BjTCP15d|BjTCP1a|BjTCP…
nucleus	Gene Ontology	GO:0005634	62	8632	1.64922e-36	6.96159e-36	BjTCP19|BjTCP15a|BjTCP15c|BjTCP15b|BjTCP15e|BjTCP13b|BjTCP13a|BjTCP8a|BjTCP15f|BjTCP2d|BjTCP8b|BjTCP2a|BjTCP2b|BjTCP2c|BjTCP7c|BjTCP7b|BjTCP7a|BjTCP7e|BjTCP7d|BjTCP5a|BjTCP17a|BjTCP5c|BjTCP5b|BjTCP21f|BjTCP17b|BjTCP21d|BjTCP21e|BjTCP21b|BjTCP21c|BjTCP21a|BjTCP9a|BjTCP24d|BjTCP9c|BjTCP9b|BjTCP24a|BjTCP9d|BjTCP24c|BjTCP24b|BjTCP20a|BjTCP13c|BjTCP20c|BjTCP20b|BjTCP12a|BjTCP12b|BjTCP15d|BjTCP1a|BjTCP…
organelle	Gene Ontology	GO:0043226	62	16128	1.00661e-19	2.66205e-19	BjTCP19|BjTCP15a|BjTCP15c|BjTCP15b|BjTCP15e|BjTCP13b|BjTCP13a|BjTCP8a|BjTCP15f|BjTCP2d|BjTCP8b|BjTCP2a|BjTCP2b|BjTCP2c|BjTCP7c|BjTCP7b|BjTCP7a|BjTCP7e|BjTCP7d|BjTCP5a|BjTCP17a|BjTCP5c|BjTCP5b|BjTCP21f|BjTCP17b|BjTCP21d|BjTCP21e|BjTCP21b|BjTCP21c|BjTCP21a|BjTCP9a|BjTCP24d|BjTCP9c|BjTCP9b|BjTCP24a|BjTCP9d|BjTCP24c|BjTCP24b|BjTCP20a|BjTCP13c|BjTCP20c|BjTCP20b|BjTCP12a|BjTCP12b|BjTCP15d|BjTCP1a|BjTCP…
organic cyclic compound binding	Gene Ontology	GO:0097159	62	5548	2.33945e-48	1.16707e-47	BjTCP19|BjTCP15a|BjTCP15c|BjTCP15b|BjTCP15e|BjTCP13b|BjTCP13a|BjTCP8a|BjTCP15f|BjTCP2d|BjTCP8b|BjTCP2a|BjTCP2b|BjTCP2c|BjTCP7c|BjTCP7b|BjTCP7a|BjTCP7e|BjTCP7d|BjTCP5a|BjTCP17a|BjTCP5c|BjTCP5b|BjTCP21f|BjTCP17b|BjTCP21d|BjTCP21e|BjTCP21b|BjTCP21c|BjTCP21a|BjTCP9a|BjTCP24d|BjTCP9c|BjTCP9b|BjTCP24a|BjTCP9d|BjTCP24c|BjTCP24b|BjTCP20a|BjTCP13c|BjTCP20c|BjTCP20b|BjTCP12a|BjTCP12b|BjTCP15d|BjTCP1a|BjTCP…
regulation of biological process	Gene Ontology	GO:0050789	62	4901	1.12287e-51	6.66133e-51	BjTCP19|BjTCP15a|BjTCP15c|BjTCP15b|BjTCP15e|BjTCP13b|BjTCP13a|BjTCP8a|BjTCP15f|BjTCP2d|BjTCP8b|BjTCP2a|BjTCP2b|BjTCP2c|BjTCP7c|BjTCP7b|BjTCP7a|BjTCP7e|BjTCP7d|BjTCP5a|BjTCP17a|BjTCP5c|BjTCP5b|BjTCP21f|BjTCP17b|BjTCP21d|BjTCP21e|BjTCP21b|BjTCP21c|BjTCP21a|BjTCP9a|BjTCP24d|BjTCP9c|BjTCP9b|BjTCP24a|BjTCP9d|BjTCP24c|BjTCP24b|BjTCP20a|BjTCP13c|BjTCP20c|BjTCP20b|BjTCP12a|BjTCP12b|BjTCP15d|BjTCP1a|BjTCP…
regulation of biosynthetic process	Gene Ontology	GO:0009889	62	2372	4.91966e-71	8.30665e-70	BjTCP19|BjTCP15a|BjTCP15c|BjTCP15b|BjTCP15e|BjTCP13b|BjTCP13a|BjTCP8a|BjTCP15f|BjTCP2d|BjTCP8b|BjTCP2a|BjTCP2b|BjTCP2c|BjTCP7c|BjTCP7b|BjTCP7a|BjTCP7e|BjTCP7d|BjTCP5a|BjTCP17a|BjTCP5c|BjTCP5b|BjTCP21f|BjTCP17b|BjTCP21d|BjTCP21e|BjTCP21b|BjTCP21c|BjTCP21a|BjTCP9a|BjTCP24d|BjTCP9c|BjTCP9b|BjTCP24a|BjTCP9d|BjTCP24c|BjTCP24b|BjTCP20a|BjTCP13c|BjTCP20c|BjTCP20b|BjTCP12a|BjTCP12b|BjTCP15d|BjTCP1a|BjTCP…
regulation of cellular biosynthetic process	Gene Ontology	GO:0031326	62	2349	2.71027e-71	4.95753e-70	BjTCP19|BjTCP15a|BjTCP15c|BjTCP15b|BjTCP15e|BjTCP13b|BjTCP13a|BjTCP8a|BjTCP15f|BjTCP2d|BjTCP8b|BjTCP2a|BjTCP2b|BjTCP2c|BjTCP7c|BjTCP7b|BjTCP7a|BjTCP7e|BjTCP7d|BjTCP5a|BjTCP17a|BjTCP5c|BjTCP5b|BjTCP21f|BjTCP17b|BjTCP21d|BjTCP21e|BjTCP21b|BjTCP21c|BjTCP21a|BjTCP9a|BjTCP24d|BjTCP9c|BjTCP9b|BjTCP24a|BjTCP9d|BjTCP24c|BjTCP24b|BjTCP20a|BjTCP13c|BjTCP20c|BjTCP20b|BjTCP12a|BjTCP12b|BjTCP15d|BjTCP1a|BjTCP…
regulation of cellular macromolecule biosynthetic process	Gene Ontology	GO:2000112	62	2267	3.08382e-72	6.76898e-71	BjTCP19|BjTCP15a|BjTCP15c|BjTCP15b|BjTCP15e|BjTCP13b|BjTCP13a|BjTCP8a|BjTCP15f|BjTCP2d|BjTCP8b|BjTCP2a|BjTCP2b|BjTCP2c|BjTCP7c|BjTCP7b|BjTCP7a|BjTCP7e|BjTCP7d|BjTCP5a|BjTCP17a|BjTCP5c|BjTCP5b|BjTCP21f|BjTCP17b|BjTCP21d|BjTCP21e|BjTCP21b|BjTCP21c|BjTCP21a|BjTCP9a|BjTCP24d|BjTCP9c|BjTCP9b|BjTCP24a|BjTCP9d|BjTCP24c|BjTCP24b|BjTCP20a|BjTCP13c|BjTCP20c|BjTCP20b|BjTCP12a|BjTCP12b|BjTCP15d|BjTCP1a|BjTCP…
regulation of cellular metabolic process	Gene Ontology	GO:0031323	62	2823	2.10222e-66	2.30719e-65	BjTCP19|BjTCP15a|BjTCP15c|BjTCP15b|BjTCP15e|BjTCP13b|BjTCP13a|BjTCP8a|BjTCP15f|BjTCP2d|BjTCP8b|BjTCP2a|BjTCP2b|BjTCP2c|BjTCP7c|BjTCP7b|BjTCP7a|BjTCP7e|BjTCP7d|BjTCP5a|BjTCP17a|BjTCP5c|BjTCP5b|BjTCP21f|BjTCP17b|BjTCP21d|BjTCP21e|BjTCP21b|BjTCP21c|BjTCP21a|BjTCP9a|BjTCP24d|BjTCP9c|BjTCP9b|BjTCP24a|BjTCP9d|BjTCP24c|BjTCP24b|BjTCP20a|BjTCP13c|BjTCP20c|BjTCP20b|BjTCP12a|BjTCP12b|BjTCP15d|BjTCP1a|BjTCP…
regulation of cellular process	Gene Ontology	GO:0050794	62	4368	9.35683e-55	6.04066e-54	BjTCP19|BjTCP15a|BjTCP15c|BjTCP15b|BjTCP15e|BjTCP13b|BjTCP13a|BjTCP8a|BjTCP15f|BjTCP2d|BjTCP8b|BjTCP2a|BjTCP2b|BjTCP2c|BjTCP7c|BjTCP7b|BjTCP7a|BjTCP7e|BjTCP7d|BjTCP5a|BjTCP17a|BjTCP5c|BjTCP5b|BjTCP21f|BjTCP17b|BjTCP21d|BjTCP21e|BjTCP21b|BjTCP21c|BjTCP21a|BjTCP9a|BjTCP24d|BjTCP9c|BjTCP9b|BjTCP24a|BjTCP9d|BjTCP24c|BjTCP24b|BjTCP20a|BjTCP13c|BjTCP20c|BjTCP20b|BjTCP12a|BjTCP12b|BjTCP15d|BjTCP1a|BjTCP…
regulation of gene expression	Gene Ontology	GO:0010468	62	2450	3.56394e-70	5.58775e-69	BjTCP19|BjTCP15a|BjTCP15c|BjTCP15b|BjTCP15e|BjTCP13b|BjTCP13a|BjTCP8a|BjTCP15f|BjTCP2d|BjTCP8b|BjTCP2a|BjTCP2b|BjTCP2c|BjTCP7c|BjTCP7b|BjTCP7a|BjTCP7e|BjTCP7d|BjTCP5a|BjTCP17a|BjTCP5c|BjTCP5b|BjTCP21f|BjTCP17b|BjTCP21d|BjTCP21e|BjTCP21b|BjTCP21c|BjTCP21a|BjTCP9a|BjTCP24d|BjTCP9c|BjTCP9b|BjTCP24a|BjTCP9d|BjTCP24c|BjTCP24b|BjTCP20a|BjTCP13c|BjTCP20c|BjTCP20b|BjTCP12a|BjTCP12b|BjTCP15d|BjTCP1a|BjTCP…
regulation of macromolecule biosynthetic process	Gene Ontology	GO:0010556	62	2289	5.56676e-72	1.11082e-70	BjTCP19|BjTCP15a|BjTCP15c|BjTCP15b|BjTCP15e|BjTCP13b|BjTCP13a|BjTCP8a|BjTCP15f|BjTCP2d|BjTCP8b|BjTCP2a|BjTCP2b|BjTCP2c|BjTCP7c|BjTCP7b|BjTCP7a|BjTCP7e|BjTCP7d|BjTCP5a|BjTCP17a|BjTCP5c|BjTCP5b|BjTCP21f|BjTCP17b|BjTCP21d|BjTCP21e|BjTCP21b|BjTCP21c|BjTCP21a|BjTCP9a|BjTCP24d|BjTCP9c|BjTCP9b|BjTCP24a|BjTCP9d|BjTCP24c|BjTCP24b|BjTCP20a|BjTCP13c|BjTCP20c|BjTCP20b|BjTCP12a|BjTCP12b|BjTCP15d|BjTCP1a|BjTCP…
regulation of macromolecule metabolic process	Gene Ontology	GO:0060255	62	2845	3.38389e-66	3.53697e-65	BjTCP19|BjTCP15a|BjTCP15c|BjTCP15b|BjTCP15e|BjTCP13b|BjTCP13a|BjTCP8a|BjTCP15f|BjTCP2d|BjTCP8b|BjTCP2a|BjTCP2b|BjTCP2c|BjTCP7c|BjTCP7b|BjTCP7a|BjTCP7e|BjTCP7d|BjTCP5a|BjTCP17a|BjTCP5c|BjTCP5b|BjTCP21f|BjTCP17b|BjTCP21d|BjTCP21e|BjTCP21b|BjTCP21c|BjTCP21a|BjTCP9a|BjTCP24d|BjTCP9c|BjTCP9b|BjTCP24a|BjTCP9d|BjTCP24c|BjTCP24b|BjTCP20a|BjTCP13c|BjTCP20c|BjTCP20b|BjTCP12a|BjTCP12b|BjTCP15d|BjTCP1a|BjTCP…
regulation of metabolic process	Gene Ontology	GO:0019222	62	3039	1.93576e-64	1.84739e-63	BjTCP19|BjTCP15a|BjTCP15c|BjTCP15b|BjTCP15e|BjTCP13b|BjTCP13a|BjTCP8a|BjTCP15f|BjTCP2d|BjTCP8b|BjTCP2a|BjTCP2b|BjTCP2c|BjTCP7c|BjTCP7b|BjTCP7a|BjTCP7e|BjTCP7d|BjTCP5a|BjTCP17a|BjTCP5c|BjTCP5b|BjTCP21f|BjTCP17b|BjTCP21d|BjTCP21e|BjTCP21b|BjTCP21c|BjTCP21a|BjTCP9a|BjTCP24d|BjTCP9c|BjTCP9b|BjTCP24a|BjTCP9d|BjTCP24c|BjTCP24b|BjTCP20a|BjTCP13c|BjTCP20c|BjTCP20b|BjTCP12a|BjTCP12b|BjTCP15d|BjTCP1a|BjTCP…
regulation of nitrogen compound metabolic process	Gene Ontology	GO:0051171	62	2660	5.48785e-68	6.69212e-67	BjTCP19|BjTCP15a|BjTCP15c|BjTCP15b|BjTCP15e|BjTCP13b|BjTCP13a|BjTCP8a|BjTCP15f|BjTCP2d|BjTCP8b|BjTCP2a|BjTCP2b|BjTCP2c|BjTCP7c|BjTCP7b|BjTCP7a|BjTCP7e|BjTCP7d|BjTCP5a|BjTCP17a|BjTCP5c|BjTCP5b|BjTCP21f|BjTCP17b|BjTCP21d|BjTCP21e|BjTCP21b|BjTCP21c|BjTCP21a|BjTCP9a|BjTCP24d|BjTCP9c|BjTCP9b|BjTCP24a|BjTCP9d|BjTCP24c|BjTCP24b|BjTCP20a|BjTCP13c|BjTCP20c|BjTCP20b|BjTCP12a|BjTCP12b|BjTCP15d|BjTCP1a|BjTCP…
regulation of nucleic acid-templated transcription	Gene Ontology	GO:1903506	62	2000	1.45863e-75	5.33614e-74	BjTCP19|BjTCP15a|BjTCP15c|BjTCP15b|BjTCP15e|BjTCP13b|BjTCP13a|BjTCP8a|BjTCP15f|BjTCP2d|BjTCP8b|BjTCP2a|BjTCP2b|BjTCP2c|BjTCP7c|BjTCP7b|BjTCP7a|BjTCP7e|BjTCP7d|BjTCP5a|BjTCP17a|BjTCP5c|BjTCP5b|BjTCP21f|BjTCP17b|BjTCP21d|BjTCP21e|BjTCP21b|BjTCP21c|BjTCP21a|BjTCP9a|BjTCP24d|BjTCP9c|BjTCP9b|BjTCP24a|BjTCP9d|BjTCP24c|BjTCP24b|BjTCP20a|BjTCP13c|BjTCP20c|BjTCP20b|BjTCP12a|BjTCP12b|BjTCP15d|BjTCP1a|BjTCP…
regulation of nucleobase-containing compound metabolic process	Gene Ontology	GO:0019219	62	2113	4.1843e-74	1.0205e-72	BjTCP19|BjTCP15a|BjTCP15c|BjTCP15b|BjTCP15e|BjTCP13b|BjTCP13a|BjTCP8a|BjTCP15f|BjTCP2d|BjTCP8b|BjTCP2a|BjTCP2b|BjTCP2c|BjTCP7c|BjTCP7b|BjTCP7a|BjTCP7e|BjTCP7d|BjTCP5a|BjTCP17a|BjTCP5c|BjTCP5b|BjTCP21f|BjTCP17b|BjTCP21d|BjTCP21e|BjTCP21b|BjTCP21c|BjTCP21a|BjTCP9a|BjTCP24d|BjTCP9c|BjTCP9b|BjTCP24a|BjTCP9d|BjTCP24c|BjTCP24b|BjTCP20a|BjTCP13c|BjTCP20c|BjTCP20b|BjTCP12a|BjTCP12b|BjTCP15d|BjTCP1a|BjTCP…
regulation of primary metabolic process	Gene Ontology	GO:0080090	62	2719	2.10522e-67	2.43208e-66	BjTCP19|BjTCP15a|BjTCP15c|BjTCP15b|BjTCP15e|BjTCP13b|BjTCP13a|BjTCP8a|BjTCP15f|BjTCP2d|BjTCP8b|BjTCP2a|BjTCP2b|BjTCP2c|BjTCP7c|BjTCP7b|BjTCP7a|BjTCP7e|BjTCP7d|BjTCP5a|BjTCP17a|BjTCP5c|BjTCP5b|BjTCP21f|BjTCP17b|BjTCP21d|BjTCP21e|BjTCP21b|BjTCP21c|BjTCP21a|BjTCP9a|BjTCP24d|BjTCP9c|BjTCP9b|BjTCP24a|BjTCP9d|BjTCP24c|BjTCP24b|BjTCP20a|BjTCP13c|BjTCP20c|BjTCP20b|BjTCP12a|BjTCP12b|BjTCP15d|BjTCP1a|BjTCP…
regulation of RNA biosynthetic process	Gene Ontology	GO:2001141	62	2000	1.45863e-75	5.33614e-74	BjTCP19|BjTCP15a|BjTCP15c|BjTCP15b|BjTCP15e|BjTCP13b|BjTCP13a|BjTCP8a|BjTCP15f|BjTCP2d|BjTCP8b|BjTCP2a|BjTCP2b|BjTCP2c|BjTCP7c|BjTCP7b|BjTCP7a|BjTCP7e|BjTCP7d|BjTCP5a|BjTCP17a|BjTCP5c|BjTCP5b|BjTCP21f|BjTCP17b|BjTCP21d|BjTCP21e|BjTCP21b|BjTCP21c|BjTCP21a|BjTCP9a|BjTCP24d|BjTCP9c|BjTCP9b|BjTCP24a|BjTCP9d|BjTCP24c|BjTCP24b|BjTCP20a|BjTCP13c|BjTCP20c|BjTCP20b|BjTCP12a|BjTCP12b|BjTCP15d|BjTCP1a|BjTCP…
regulation of RNA metabolic process	Gene Ontology	GO:0051252	62	2062	9.40774e-75	2.58125e-73	BjTCP19|BjTCP15a|BjTCP15c|BjTCP15b|BjTCP15e|BjTCP13b|BjTCP13a|BjTCP8a|BjTCP15f|BjTCP2d|BjTCP8b|BjTCP2a|BjTCP2b|BjTCP2c|BjTCP7c|BjTCP7b|BjTCP7a|BjTCP7e|BjTCP7d|BjTCP5a|BjTCP17a|BjTCP5c|BjTCP5b|BjTCP21f|BjTCP17b|BjTCP21d|BjTCP21e|BjTCP21b|BjTCP21c|BjTCP21a|BjTCP9a|BjTCP24d|BjTCP9c|BjTCP9b|BjTCP24a|BjTCP9d|BjTCP24c|BjTCP24b|BjTCP20a|BjTCP13c|BjTCP20c|BjTCP20b|BjTCP12a|BjTCP12b|BjTCP15d|BjTCP1a|BjTCP…
regulation of transcription, DNA-templated	Gene Ontology	GO:0006355	62	1984	8.93342e-76	4.90221e-74	BjTCP19|BjTCP15a|BjTCP15c|BjTCP15b|BjTCP15e|BjTCP13b|BjTCP13a|BjTCP8a|BjTCP15f|BjTCP2d|BjTCP8b|BjTCP2a|BjTCP2b|BjTCP2c|BjTCP7c|BjTCP7b|BjTCP7a|BjTCP7e|BjTCP7d|BjTCP5a|BjTCP17a|BjTCP5c|BjTCP5b|BjTCP21f|BjTCP17b|BjTCP21d|BjTCP21e|BjTCP21b|BjTCP21c|BjTCP21a|BjTCP9a|BjTCP24d|BjTCP9c|BjTCP9b|BjTCP24a|BjTCP9d|BjTCP24c|BjTCP24b|BjTCP20a|BjTCP13c|BjTCP20c|BjTCP20b|BjTCP12a|BjTCP12b|BjTCP15d|BjTCP1a|BjTCP…
transcription regulator activity	Gene Ontology	GO:0140110	62	1530	1.19724e-82	8.75978e-81	BjTCP19|BjTCP15a|BjTCP15c|BjTCP15b|BjTCP15e|BjTCP13b|BjTCP13a|BjTCP8a|BjTCP15f|BjTCP2d|BjTCP8b|BjTCP2a|BjTCP2b|BjTCP2c|BjTCP7c|BjTCP7b|BjTCP7a|BjTCP7e|BjTCP7d|BjTCP5a|BjTCP17a|BjTCP5c|BjTCP5b|BjTCP21f|BjTCP17b|BjTCP21d|BjTCP21e|BjTCP21b|BjTCP21c|BjTCP21a|BjTCP9a|BjTCP24d|BjTCP9c|BjTCP9b|BjTCP24a|BjTCP9d|BjTCP24c|BjTCP24b|BjTCP20a|BjTCP13c|BjTCP20c|BjTCP20b|BjTCP12a|BjTCP12b|BjTCP15d|BjTCP1a|BjTCP…
aromatic compound biosynthetic process	Gene Ontology	GO:0019438	59	2395	6.32914e-63	5.34325e-62	BjTCP19|BjTCP15a|BjTCP15c|BjTCP15b|BjTCP15e|BjTCP13b|BjTCP13a|BjTCP8a|BjTCP15f|BjTCP2d|BjTCP8b|BjTCP2a|BjTCP2b|BjTCP2c|BjTCP7c|BjTCP7b|BjTCP7a|BjTCP7e|BjTCP7d|BjTCP5a|BjTCP17a|BjTCP5c|BjTCP5b|BjTCP21f|BjTCP17b|BjTCP21d|BjTCP21e|BjTCP21b|BjTCP21c|BjTCP21a|BjTCP9a|BjTCP24d|BjTCP9c|BjTCP9b|BjTCP24a|BjTCP9d|BjTCP24c|BjTCP24b|BjTCP13c|BjTCP14a|BjTCP12a|BjTCP12b|BjTCP15d|BjTCP1a|BjTCP1c|BjTCP1b|BjTCP1e…
biosynthetic process	Gene Ontology	GO:0009058	59	4309	4.22994e-48	2.01842e-47	BjTCP19|BjTCP15a|BjTCP15c|BjTCP15b|BjTCP15e|BjTCP13b|BjTCP13a|BjTCP8a|BjTCP15f|BjTCP2d|BjTCP8b|BjTCP2a|BjTCP2b|BjTCP2c|BjTCP7c|BjTCP7b|BjTCP7a|BjTCP7e|BjTCP7d|BjTCP5a|BjTCP17a|BjTCP5c|BjTCP5b|BjTCP21f|BjTCP17b|BjTCP21d|BjTCP21e|BjTCP21b|BjTCP21c|BjTCP21a|BjTCP9a|BjTCP24d|BjTCP9c|BjTCP9b|BjTCP24a|BjTCP9d|BjTCP24c|BjTCP24b|BjTCP13c|BjTCP14a|BjTCP12a|BjTCP12b|BjTCP15d|BjTCP1a|BjTCP1c|BjTCP1b|BjTCP1e…
cellular aromatic compound metabolic process	Gene Ontology	GO:0006725	59	3882	9.79298e-51	5.51169e-50	BjTCP19|BjTCP15a|BjTCP15c|BjTCP15b|BjTCP15e|BjTCP13b|BjTCP13a|BjTCP8a|BjTCP15f|BjTCP2d|BjTCP8b|BjTCP2a|BjTCP2b|BjTCP2c|BjTCP7c|BjTCP7b|BjTCP7a|BjTCP7e|BjTCP7d|BjTCP5a|BjTCP17a|BjTCP5c|BjTCP5b|BjTCP21f|BjTCP17b|BjTCP21d|BjTCP21e|BjTCP21b|BjTCP21c|BjTCP21a|BjTCP9a|BjTCP24d|BjTCP9c|BjTCP9b|BjTCP24a|BjTCP9d|BjTCP24c|BjTCP24b|BjTCP13c|BjTCP14a|BjTCP12a|BjTCP12b|BjTCP15d|BjTCP1a|BjTCP1c|BjTCP1b|BjTCP1e…
cellular biosynthetic process	Gene Ontology	GO:0044249	59	4123	3.25108e-49	1.74052e-48	BjTCP19|BjTCP15a|BjTCP15c|BjTCP15b|BjTCP15e|BjTCP13b|BjTCP13a|BjTCP8a|BjTCP15f|BjTCP2d|BjTCP8b|BjTCP2a|BjTCP2b|BjTCP2c|BjTCP7c|BjTCP7b|BjTCP7a|BjTCP7e|BjTCP7d|BjTCP5a|BjTCP17a|BjTCP5c|BjTCP5b|BjTCP21f|BjTCP17b|BjTCP21d|BjTCP21e|BjTCP21b|BjTCP21c|BjTCP21a|BjTCP9a|BjTCP24d|BjTCP9c|BjTCP9b|BjTCP24a|BjTCP9d|BjTCP24c|BjTCP24b|BjTCP13c|BjTCP14a|BjTCP12a|BjTCP12b|BjTCP15d|BjTCP1a|BjTCP1c|BjTCP1b|BjTCP1e…
cellular macromolecule biosynthetic process	Gene Ontology	GO:0034645	59	2885	3.1359e-58	2.37356e-57	BjTCP19|BjTCP15a|BjTCP15c|BjTCP15b|BjTCP15e|BjTCP13b|BjTCP13a|BjTCP8a|BjTCP15f|BjTCP2d|BjTCP8b|BjTCP2a|BjTCP2b|BjTCP2c|BjTCP7c|BjTCP7b|BjTCP7a|BjTCP7e|BjTCP7d|BjTCP5a|BjTCP17a|BjTCP5c|BjTCP5b|BjTCP21f|BjTCP17b|BjTCP21d|BjTCP21e|BjTCP21b|BjTCP21c|BjTCP21a|BjTCP9a|BjTCP24d|BjTCP9c|BjTCP9b|BjTCP24a|BjTCP9d|BjTCP24c|BjTCP24b|BjTCP13c|BjTCP14a|BjTCP12a|BjTCP12b|BjTCP15d|BjTCP1a|BjTCP1c|BjTCP1b|BjTCP1e…
cellular macromolecule metabolic process	Gene Ontology	GO:0044260	59	5542	9.51375e-42	4.35056e-41	BjTCP19|BjTCP15a|BjTCP15c|BjTCP15b|BjTCP15e|BjTCP13b|BjTCP13a|BjTCP8a|BjTCP15f|BjTCP2d|BjTCP8b|BjTCP2a|BjTCP2b|BjTCP2c|BjTCP7c|BjTCP7b|BjTCP7a|BjTCP7e|BjTCP7d|BjTCP5a|BjTCP17a|BjTCP5c|BjTCP5b|BjTCP21f|BjTCP17b|BjTCP21d|BjTCP21e|BjTCP21b|BjTCP21c|BjTCP21a|BjTCP9a|BjTCP24d|BjTCP9c|BjTCP9b|BjTCP24a|BjTCP9d|BjTCP24c|BjTCP24b|BjTCP13c|BjTCP14a|BjTCP12a|BjTCP12b|BjTCP15d|BjTCP1a|BjTCP1c|BjTCP1b|BjTCP1e…
cellular metabolic process	Gene Ontology	GO:0044237	59	8765	3.25519e-30	1.13415e-29	BjTCP19|BjTCP15a|BjTCP15c|BjTCP15b|BjTCP15e|BjTCP13b|BjTCP13a|BjTCP8a|BjTCP15f|BjTCP2d|BjTCP8b|BjTCP2a|BjTCP2b|BjTCP2c|BjTCP7c|BjTCP7b|BjTCP7a|BjTCP7e|BjTCP7d|BjTCP5a|BjTCP17a|BjTCP5c|BjTCP5b|BjTCP21f|BjTCP17b|BjTCP21d|BjTCP21e|BjTCP21b|BjTCP21c|BjTCP21a|BjTCP9a|BjTCP24d|BjTCP9c|BjTCP9b|BjTCP24a|BjTCP9d|BjTCP24c|BjTCP24b|BjTCP13c|BjTCP14a|BjTCP12a|BjTCP12b|BjTCP15d|BjTCP1a|BjTCP1c|BjTCP1b|BjTCP1e…
cellular nitrogen compound biosynthetic process	Gene Ontology	GO:0044271	59	2899	4.15465e-58	3.03982e-57	BjTCP19|BjTCP15a|BjTCP15c|BjTCP15b|BjTCP15e|BjTCP13b|BjTCP13a|BjTCP8a|BjTCP15f|BjTCP2d|BjTCP8b|BjTCP2a|BjTCP2b|BjTCP2c|BjTCP7c|BjTCP7b|BjTCP7a|BjTCP7e|BjTCP7d|BjTCP5a|BjTCP17a|BjTCP5c|BjTCP5b|BjTCP21f|BjTCP17b|BjTCP21d|BjTCP21e|BjTCP21b|BjTCP21c|BjTCP21a|BjTCP9a|BjTCP24d|BjTCP9c|BjTCP9b|BjTCP24a|BjTCP9d|BjTCP24c|BjTCP24b|BjTCP13c|BjTCP14a|BjTCP12a|BjTCP12b|BjTCP15d|BjTCP1a|BjTCP1c|BjTCP1b|BjTCP1e…
cellular nitrogen compound metabolic process	Gene Ontology	GO:0034641	59	4283	2.97509e-48	1.45118e-47	BjTCP19|BjTCP15a|BjTCP15c|BjTCP15b|BjTCP15e|BjTCP13b|BjTCP13a|BjTCP8a|BjTCP15f|BjTCP2d|BjTCP8b|BjTCP2a|BjTCP2b|BjTCP2c|BjTCP7c|BjTCP7b|BjTCP7a|BjTCP7e|BjTCP7d|BjTCP5a|BjTCP17a|BjTCP5c|BjTCP5b|BjTCP21f|BjTCP17b|BjTCP21d|BjTCP21e|BjTCP21b|BjTCP21c|BjTCP21a|BjTCP9a|BjTCP24d|BjTCP9c|BjTCP9b|BjTCP24a|BjTCP9d|BjTCP24c|BjTCP24b|BjTCP13c|BjTCP14a|BjTCP12a|BjTCP12b|BjTCP15d|BjTCP1a|BjTCP1c|BjTCP1b|BjTCP1e…
gene expression	Gene Ontology	GO:0010467	59	3199	1.27127e-55	8.4559e-55	BjTCP19|BjTCP15a|BjTCP15c|BjTCP15b|BjTCP15e|BjTCP13b|BjTCP13a|BjTCP8a|BjTCP15f|BjTCP2d|BjTCP8b|BjTCP2a|BjTCP2b|BjTCP2c|BjTCP7c|BjTCP7b|BjTCP7a|BjTCP7e|BjTCP7d|BjTCP5a|BjTCP17a|BjTCP5c|BjTCP5b|BjTCP21f|BjTCP17b|BjTCP21d|BjTCP21e|BjTCP21b|BjTCP21c|BjTCP21a|BjTCP9a|BjTCP24d|BjTCP9c|BjTCP9b|BjTCP24a|BjTCP9d|BjTCP24c|BjTCP24b|BjTCP13c|BjTCP14a|BjTCP12a|BjTCP12b|BjTCP15d|BjTCP1a|BjTCP1c|BjTCP1b|BjTCP1e…
heterocycle biosynthetic process	Gene Ontology	GO:0018130	59	2316	9.03634e-64	8.26449e-63	BjTCP19|BjTCP15a|BjTCP15c|BjTCP15b|BjTCP15e|BjTCP13b|BjTCP13a|BjTCP8a|BjTCP15f|BjTCP2d|BjTCP8b|BjTCP2a|BjTCP2b|BjTCP2c|BjTCP7c|BjTCP7b|BjTCP7a|BjTCP7e|BjTCP7d|BjTCP5a|BjTCP17a|BjTCP5c|BjTCP5b|BjTCP21f|BjTCP17b|BjTCP21d|BjTCP21e|BjTCP21b|BjTCP21c|BjTCP21a|BjTCP9a|BjTCP24d|BjTCP9c|BjTCP9b|BjTCP24a|BjTCP9d|BjTCP24c|BjTCP24b|BjTCP13c|BjTCP14a|BjTCP12a|BjTCP12b|BjTCP15d|BjTCP1a|BjTCP1c|BjTCP1b|BjTCP1e…
heterocycle metabolic process	Gene Ontology	GO:0046483	59	3744	1.1934e-51	6.89344e-51	BjTCP19|BjTCP15a|BjTCP15c|BjTCP15b|BjTCP15e|BjTCP13b|BjTCP13a|BjTCP8a|BjTCP15f|BjTCP2d|BjTCP8b|BjTCP2a|BjTCP2b|BjTCP2c|BjTCP7c|BjTCP7b|BjTCP7a|BjTCP7e|BjTCP7d|BjTCP5a|BjTCP17a|BjTCP5c|BjTCP5b|BjTCP21f|BjTCP17b|BjTCP21d|BjTCP21e|BjTCP21b|BjTCP21c|BjTCP21a|BjTCP9a|BjTCP24d|BjTCP9c|BjTCP9b|BjTCP24a|BjTCP9d|BjTCP24c|BjTCP24b|BjTCP13c|BjTCP14a|BjTCP12a|BjTCP12b|BjTCP15d|BjTCP1a|BjTCP1c|BjTCP1b|BjTCP1e…
macromolecule biosynthetic process	Gene Ontology	GO:0009059	59	2958	1.33976e-57	9.48638e-57	BjTCP19|BjTCP15a|BjTCP15c|BjTCP15b|BjTCP15e|BjTCP13b|BjTCP13a|BjTCP8a|BjTCP15f|BjTCP2d|BjTCP8b|BjTCP2a|BjTCP2b|BjTCP2c|BjTCP7c|BjTCP7b|BjTCP7a|BjTCP7e|BjTCP7d|BjTCP5a|BjTCP17a|BjTCP5c|BjTCP5b|BjTCP21f|BjTCP17b|BjTCP21d|BjTCP21e|BjTCP21b|BjTCP21c|BjTCP21a|BjTCP9a|BjTCP24d|BjTCP9c|BjTCP9b|BjTCP24a|BjTCP9d|BjTCP24c|BjTCP24b|BjTCP13c|BjTCP14a|BjTCP12a|BjTCP12b|BjTCP15d|BjTCP1a|BjTCP1c|BjTCP1b|BjTCP1e…
macromolecule metabolic process	Gene Ontology	GO:0043170	59	6748	8.72466e-37	3.75503e-36	BjTCP19|BjTCP15a|BjTCP15c|BjTCP15b|BjTCP15e|BjTCP13b|BjTCP13a|BjTCP8a|BjTCP15f|BjTCP2d|BjTCP8b|BjTCP2a|BjTCP2b|BjTCP2c|BjTCP7c|BjTCP7b|BjTCP7a|BjTCP7e|BjTCP7d|BjTCP5a|BjTCP17a|BjTCP5c|BjTCP5b|BjTCP21f|BjTCP17b|BjTCP21d|BjTCP21e|BjTCP21b|BjTCP21c|BjTCP21a|BjTCP9a|BjTCP24d|BjTCP9c|BjTCP9b|BjTCP24a|BjTCP9d|BjTCP24c|BjTCP24b|BjTCP13c|BjTCP14a|BjTCP12a|BjTCP12b|BjTCP15d|BjTCP1a|BjTCP1c|BjTCP1b|BjTCP1e…
metabolic process	Gene Ontology	GO:0008152	59	10224	2.31924e-26	7.17006e-26	BjTCP19|BjTCP15a|BjTCP15c|BjTCP15b|BjTCP15e|BjTCP13b|BjTCP13a|BjTCP8a|BjTCP15f|BjTCP2d|BjTCP8b|BjTCP2a|BjTCP2b|BjTCP2c|BjTCP7c|BjTCP7b|BjTCP7a|BjTCP7e|BjTCP7d|BjTCP5a|BjTCP17a|BjTCP5c|BjTCP5b|BjTCP21f|BjTCP17b|BjTCP21d|BjTCP21e|BjTCP21b|BjTCP21c|BjTCP21a|BjTCP9a|BjTCP24d|BjTCP9c|BjTCP9b|BjTCP24a|BjTCP9d|BjTCP24c|BjTCP24b|BjTCP13c|BjTCP14a|BjTCP12a|BjTCP12b|BjTCP15d|BjTCP1a|BjTCP1c|BjTCP1b|BjTCP1e…
nitrogen compound metabolic process	Gene Ontology	GO:0006807	59	7262	6.1405e-35	2.496e-34	BjTCP19|BjTCP15a|BjTCP15c|BjTCP15b|BjTCP15e|BjTCP13b|BjTCP13a|BjTCP8a|BjTCP15f|BjTCP2d|BjTCP8b|BjTCP2a|BjTCP2b|BjTCP2c|BjTCP7c|BjTCP7b|BjTCP7a|BjTCP7e|BjTCP7d|BjTCP5a|BjTCP17a|BjTCP5c|BjTCP5b|BjTCP21f|BjTCP17b|BjTCP21d|BjTCP21e|BjTCP21b|BjTCP21c|BjTCP21a|BjTCP9a|BjTCP24d|BjTCP9c|BjTCP9b|BjTCP24a|BjTCP9d|BjTCP24c|BjTCP24b|BjTCP13c|BjTCP14a|BjTCP12a|BjTCP12b|BjTCP15d|BjTCP1a|BjTCP1c|BjTCP1b|BjTCP1e…
nucleic acid metabolic process	Gene Ontology	GO:0090304	59	3145	4.72533e-56	3.24128e-55	BjTCP19|BjTCP15a|BjTCP15c|BjTCP15b|BjTCP15e|BjTCP13b|BjTCP13a|BjTCP8a|BjTCP15f|BjTCP2d|BjTCP8b|BjTCP2a|BjTCP2b|BjTCP2c|BjTCP7c|BjTCP7b|BjTCP7a|BjTCP7e|BjTCP7d|BjTCP5a|BjTCP17a|BjTCP5c|BjTCP5b|BjTCP21f|BjTCP17b|BjTCP21d|BjTCP21e|BjTCP21b|BjTCP21c|BjTCP21a|BjTCP9a|BjTCP24d|BjTCP9c|BjTCP9b|BjTCP24a|BjTCP9d|BjTCP24c|BjTCP24b|BjTCP13c|BjTCP14a|BjTCP12a|BjTCP12b|BjTCP15d|BjTCP1a|BjTCP1c|BjTCP1b|BjTCP1e…
nucleic acid-templated transcription	Gene Ontology	GO:0097659	59	1855	2.33838e-69	3.20796e-68	BjTCP19|BjTCP15a|BjTCP15c|BjTCP15b|BjTCP15e|BjTCP13b|BjTCP13a|BjTCP8a|BjTCP15f|BjTCP2d|BjTCP8b|BjTCP2a|BjTCP2b|BjTCP2c|BjTCP7c|BjTCP7b|BjTCP7a|BjTCP7e|BjTCP7d|BjTCP5a|BjTCP17a|BjTCP5c|BjTCP5b|BjTCP21f|BjTCP17b|BjTCP21d|BjTCP21e|BjTCP21b|BjTCP21c|BjTCP21a|BjTCP9a|BjTCP24d|BjTCP9c|BjTCP9b|BjTCP24a|BjTCP9d|BjTCP24c|BjTCP24b|BjTCP13c|BjTCP14a|BjTCP12a|BjTCP12b|BjTCP15d|BjTCP1a|BjTCP1c|BjTCP1b|BjTCP1e…
nucleobase-containing compound biosynthetic process	Gene Ontology	GO:0034654	59	2119	5.20872e-66	5.19688e-65	BjTCP19|BjTCP15a|BjTCP15c|BjTCP15b|BjTCP15e|BjTCP13b|BjTCP13a|BjTCP8a|BjTCP15f|BjTCP2d|BjTCP8b|BjTCP2a|BjTCP2b|BjTCP2c|BjTCP7c|BjTCP7b|BjTCP7a|BjTCP7e|BjTCP7d|BjTCP5a|BjTCP17a|BjTCP5c|BjTCP5b|BjTCP21f|BjTCP17b|BjTCP21d|BjTCP21e|BjTCP21b|BjTCP21c|BjTCP21a|BjTCP9a|BjTCP24d|BjTCP9c|BjTCP9b|BjTCP24a|BjTCP9d|BjTCP24c|BjTCP24b|BjTCP13c|BjTCP14a|BjTCP12a|BjTCP12b|BjTCP15d|BjTCP1a|BjTCP1c|BjTCP1b|BjTCP1e…
nucleobase-containing compound metabolic process	Gene Ontology	GO:0006139	59	3464	1.29953e-53	8.14992e-53	BjTCP19|BjTCP15a|BjTCP15c|BjTCP15b|BjTCP15e|BjTCP13b|BjTCP13a|BjTCP8a|BjTCP15f|BjTCP2d|BjTCP8b|BjTCP2a|BjTCP2b|BjTCP2c|BjTCP7c|BjTCP7b|BjTCP7a|BjTCP7e|BjTCP7d|BjTCP5a|BjTCP17a|BjTCP5c|BjTCP5b|BjTCP21f|BjTCP17b|BjTCP21d|BjTCP21e|BjTCP21b|BjTCP21c|BjTCP21a|BjTCP9a|BjTCP24d|BjTCP9c|BjTCP9b|BjTCP24a|BjTCP9d|BjTCP24c|BjTCP24b|BjTCP13c|BjTCP14a|BjTCP12a|BjTCP12b|BjTCP15d|BjTCP1a|BjTCP1c|BjTCP1b|BjTCP1e…
organic cyclic compound biosynthetic process	Gene Ontology	GO:1901362	59	2483	5.1408e-62	4.17928e-61	BjTCP19|BjTCP15a|BjTCP15c|BjTCP15b|BjTCP15e|BjTCP13b|BjTCP13a|BjTCP8a|BjTCP15f|BjTCP2d|BjTCP8b|BjTCP2a|BjTCP2b|BjTCP2c|BjTCP7c|BjTCP7b|BjTCP7a|BjTCP7e|BjTCP7d|BjTCP5a|BjTCP17a|BjTCP5c|BjTCP5b|BjTCP21f|BjTCP17b|BjTCP21d|BjTCP21e|BjTCP21b|BjTCP21c|BjTCP21a|BjTCP9a|BjTCP24d|BjTCP9c|BjTCP9b|BjTCP24a|BjTCP9d|BjTCP24c|BjTCP24b|BjTCP13c|BjTCP14a|BjTCP12a|BjTCP12b|BjTCP15d|BjTCP1a|BjTCP1c|BjTCP1b|BjTCP1e…
organic cyclic compound metabolic process	Gene Ontology	GO:1901360	59	3969	3.55354e-50	1.95e-49	BjTCP19|BjTCP15a|BjTCP15c|BjTCP15b|BjTCP15e|BjTCP13b|BjTCP13a|BjTCP8a|BjTCP15f|BjTCP2d|BjTCP8b|BjTCP2a|BjTCP2b|BjTCP2c|BjTCP7c|BjTCP7b|BjTCP7a|BjTCP7e|BjTCP7d|BjTCP5a|BjTCP17a|BjTCP5c|BjTCP5b|BjTCP21f|BjTCP17b|BjTCP21d|BjTCP21e|BjTCP21b|BjTCP21c|BjTCP21a|BjTCP9a|BjTCP24d|BjTCP9c|BjTCP9b|BjTCP24a|BjTCP9d|BjTCP24c|BjTCP24b|BjTCP13c|BjTCP14a|BjTCP12a|BjTCP12b|BjTCP15d|BjTCP1a|BjTCP1c|BjTCP1b|BjTCP1e…
organic substance biosynthetic process	Gene Ontology	GO:1901576	59	4182	7.42765e-49	3.88183e-48	BjTCP19|BjTCP15a|BjTCP15c|BjTCP15b|BjTCP15e|BjTCP13b|BjTCP13a|BjTCP8a|BjTCP15f|BjTCP2d|BjTCP8b|BjTCP2a|BjTCP2b|BjTCP2c|BjTCP7c|BjTCP7b|BjTCP7a|BjTCP7e|BjTCP7d|BjTCP5a|BjTCP17a|BjTCP5c|BjTCP5b|BjTCP21f|BjTCP17b|BjTCP21d|BjTCP21e|BjTCP21b|BjTCP21c|BjTCP21a|BjTCP9a|BjTCP24d|BjTCP9c|BjTCP9b|BjTCP24a|BjTCP9d|BjTCP24c|BjTCP24b|BjTCP13c|BjTCP14a|BjTCP12a|BjTCP12b|BjTCP15d|BjTCP1a|BjTCP1c|BjTCP1b|BjTCP1e…
organic substance metabolic process	Gene Ontology	GO:0071704	59	8962	1.17398e-29	3.96444e-29	BjTCP19|BjTCP15a|BjTCP15c|BjTCP15b|BjTCP15e|BjTCP13b|BjTCP13a|BjTCP8a|BjTCP15f|BjTCP2d|BjTCP8b|BjTCP2a|BjTCP2b|BjTCP2c|BjTCP7c|BjTCP7b|BjTCP7a|BjTCP7e|BjTCP7d|BjTCP5a|BjTCP17a|BjTCP5c|BjTCP5b|BjTCP21f|BjTCP17b|BjTCP21d|BjTCP21e|BjTCP21b|BjTCP21c|BjTCP21a|BjTCP9a|BjTCP24d|BjTCP9c|BjTCP9b|BjTCP24a|BjTCP9d|BjTCP24c|BjTCP24b|BjTCP13c|BjTCP14a|BjTCP12a|BjTCP12b|BjTCP15d|BjTCP1a|BjTCP1c|BjTCP1b|BjTCP1e…
primary metabolic process	Gene Ontology	GO:0044238	59	8358	2.0892e-31	7.64299e-31	BjTCP19|BjTCP15a|BjTCP15c|BjTCP15b|BjTCP15e|BjTCP13b|BjTCP13a|BjTCP8a|BjTCP15f|BjTCP2d|BjTCP8b|BjTCP2a|BjTCP2b|BjTCP2c|BjTCP7c|BjTCP7b|BjTCP7a|BjTCP7e|BjTCP7d|BjTCP5a|BjTCP17a|BjTCP5c|BjTCP5b|BjTCP21f|BjTCP17b|BjTCP21d|BjTCP21e|BjTCP21b|BjTCP21c|BjTCP21a|BjTCP9a|BjTCP24d|BjTCP9c|BjTCP9b|BjTCP24a|BjTCP9d|BjTCP24c|BjTCP24b|BjTCP13c|BjTCP14a|BjTCP12a|BjTCP12b|BjTCP15d|BjTCP1a|BjTCP1c|BjTCP1b|BjTCP1e…
RNA biosynthetic process	Gene Ontology	GO:0032774	59	1869	3.6137e-69	4.66592e-68	BjTCP19|BjTCP15a|BjTCP15c|BjTCP15b|BjTCP15e|BjTCP13b|BjTCP13a|BjTCP8a|BjTCP15f|BjTCP2d|BjTCP8b|BjTCP2a|BjTCP2b|BjTCP2c|BjTCP7c|BjTCP7b|BjTCP7a|BjTCP7e|BjTCP7d|BjTCP5a|BjTCP17a|BjTCP5c|BjTCP5b|BjTCP21f|BjTCP17b|BjTCP21d|BjTCP21e|BjTCP21b|BjTCP21c|BjTCP21a|BjTCP9a|BjTCP24d|BjTCP9c|BjTCP9b|BjTCP24a|BjTCP9d|BjTCP24c|BjTCP24b|BjTCP13c|BjTCP14a|BjTCP12a|BjTCP12b|BjTCP15d|BjTCP1a|BjTCP1c|BjTCP1b|BjTCP1e…
RNA metabolic process	Gene Ontology	GO:0016070	59	2776	3.34576e-59	2.62283e-58	BjTCP19|BjTCP15a|BjTCP15c|BjTCP15b|BjTCP15e|BjTCP13b|BjTCP13a|BjTCP8a|BjTCP15f|BjTCP2d|BjTCP8b|BjTCP2a|BjTCP2b|BjTCP2c|BjTCP7c|BjTCP7b|BjTCP7a|BjTCP7e|BjTCP7d|BjTCP5a|BjTCP17a|BjTCP5c|BjTCP5b|BjTCP21f|BjTCP17b|BjTCP21d|BjTCP21e|BjTCP21b|BjTCP21c|BjTCP21a|BjTCP9a|BjTCP24d|BjTCP9c|BjTCP9b|BjTCP24a|BjTCP9d|BjTCP24c|BjTCP24b|BjTCP13c|BjTCP14a|BjTCP12a|BjTCP12b|BjTCP15d|BjTCP1a|BjTCP1c|BjTCP1b|BjTCP1e…
transcription, DNA-templated	Gene Ontology	GO:0006351	59	1847	1.82079e-69	2.66442e-68	BjTCP19|BjTCP15a|BjTCP15c|BjTCP15b|BjTCP15e|BjTCP13b|BjTCP13a|BjTCP8a|BjTCP15f|BjTCP2d|BjTCP8b|BjTCP2a|BjTCP2b|BjTCP2c|BjTCP7c|BjTCP7b|BjTCP7a|BjTCP7e|BjTCP7d|BjTCP5a|BjTCP17a|BjTCP5c|BjTCP5b|BjTCP21f|BjTCP17b|BjTCP21d|BjTCP21e|BjTCP21b|BjTCP21c|BjTCP21a|BjTCP9a|BjTCP24d|BjTCP9c|BjTCP9b|BjTCP24a|BjTCP9d|BjTCP24c|BjTCP24b|BjTCP13c|BjTCP14a|BjTCP12a|BjTCP12b|BjTCP15d|BjTCP1a|BjTCP1c|BjTCP1b|BjTCP1e…
sequence-specific DNA binding	Gene Ontology	GO:0043565	57	724	2.43901e-87	5.35362e-85	BjTCP19|BjTCP15a|BjTCP15c|BjTCP15b|BjTCP15e|BjTCP13b|BjTCP13a|BjTCP8a|BjTCP2d|BjTCP8b|BjTCP2a|BjTCP2b|BjTCP2c|BjTCP7c|BjTCP7b|BjTCP7a|BjTCP7e|BjTCP7d|BjTCP5a|BjTCP17a|BjTCP5c|BjTCP5b|BjTCP21f|BjTCP17b|BjTCP21d|BjTCP21e|BjTCP21b|BjTCP21c|BjTCP21a|BjTCP9a|BjTCP24d|BjTCP9c|BjTCP9b|BjTCP24a|BjTCP9d|BjTCP24c|BjTCP24b|BjTCP20a|BjTCP13c|BjTCP20c|BjTCP20b|BjTCP12a|BjTCP12b|BjTCP15d|BjTCP15f|BjTCP6|BjTCP3…
protein binding	Gene Ontology	GO:0005515	49	4103	1.31524e-32	4.9775e-32	BjTCP19|BjTCP15a|BjTCP15c|BjTCP15b|BjTCP15e|BjTCP13b|BjTCP13a|BjTCP8a|BjTCP2d|BjTCP8b|BjTCP2a|BjTCP2b|BjTCP2c|BjTCP7c|BjTCP7b|BjTCP7a|BjTCP7e|BjTCP7d|BjTCP5a|BjTCP17a|BjTCP5c|BjTCP5b|BjTCP21f|BjTCP17b|BjTCP21d|BjTCP21e|BjTCP21b|BjTCP21c|BjTCP21a|BjTCP9a|BjTCP24d|BjTCP9c|BjTCP9b|BjTCP24a|BjTCP9d|BjTCP24c|BjTCP24b|BjTCP20a|BjTCP13c|BjTCP20c|BjTCP20b|BjTCP15d|BjTCP15f|BjTCP14b|BjTCP14a|BjTCP18b|BjTC…
anatomical structure development	Gene Ontology	GO:0048856	43	2882	4.51062e-31	1.5969e-30	BjTCP15a|BjTCP15c|BjTCP15b|BjTCP15e|BjTCP13b|BjTCP13a|BjTCP15f|BjTCP2d|BjTCP2a|BjTCP2b|BjTCP2c|BjTCP5a|BjTCP5c|BjTCP5b|BjTCP17b|BjTCP17a|BjTCP9a|BjTCP24d|BjTCP9c|BjTCP9b|BjTCP24a|BjTCP9d|BjTCP24c|BjTCP24b|BjTCP20a|BjTCP13c|BjTCP20c|BjTCP20b|BjTCP12a|BjTCP12b|BjTCP15d|BjTCP1a|BjTCP1c|BjTCP1b|BjTCP1e|BjTCP1d|BjTCP3|BjTCP14b|BjTCP14a|BjTCP18b|BjTCP18c|BjTCP18a|BjTCP18d
developmental process	Gene Ontology	GO:0032502	43	3027	3.34955e-30	1.14879e-29	BjTCP15a|BjTCP15c|BjTCP15b|BjTCP15e|BjTCP13b|BjTCP13a|BjTCP15f|BjTCP2d|BjTCP2a|BjTCP2b|BjTCP2c|BjTCP5a|BjTCP5c|BjTCP5b|BjTCP17b|BjTCP17a|BjTCP9a|BjTCP24d|BjTCP9c|BjTCP9b|BjTCP24a|BjTCP9d|BjTCP24c|BjTCP24b|BjTCP20a|BjTCP13c|BjTCP20c|BjTCP20b|BjTCP12a|BjTCP12b|BjTCP15d|BjTCP1a|BjTCP1c|BjTCP1b|BjTCP1e|BjTCP1d|BjTCP3|BjTCP14b|BjTCP14a|BjTCP18b|BjTCP18c|BjTCP18a|BjTCP18d
multicellular organism development	Gene Ontology	GO:0007275	43	2554	3.19128e-33	1.22892e-32	BjTCP15a|BjTCP15c|BjTCP15b|BjTCP15e|BjTCP13b|BjTCP13a|BjTCP15f|BjTCP2d|BjTCP2a|BjTCP2b|BjTCP2c|BjTCP5a|BjTCP5c|BjTCP5b|BjTCP17b|BjTCP17a|BjTCP9a|BjTCP24d|BjTCP9c|BjTCP9b|BjTCP24a|BjTCP9d|BjTCP24c|BjTCP24b|BjTCP20a|BjTCP13c|BjTCP20c|BjTCP20b|BjTCP12a|BjTCP12b|BjTCP15d|BjTCP1a|BjTCP1c|BjTCP1b|BjTCP1e|BjTCP1d|BjTCP3|BjTCP14b|BjTCP14a|BjTCP18b|BjTCP18c|BjTCP18a|BjTCP18d
multicellular organismal process	Gene Ontology	GO:0032501	43	2789	1.17875e-31	4.38533e-31	BjTCP15a|BjTCP15c|BjTCP15b|BjTCP15e|BjTCP13b|BjTCP13a|BjTCP15f|BjTCP2d|BjTCP2a|BjTCP2b|BjTCP2c|BjTCP5a|BjTCP5c|BjTCP5b|BjTCP17b|BjTCP17a|BjTCP9a|BjTCP24d|BjTCP9c|BjTCP9b|BjTCP24a|BjTCP9d|BjTCP24c|BjTCP24b|BjTCP20a|BjTCP13c|BjTCP20c|BjTCP20b|BjTCP12a|BjTCP12b|BjTCP15d|BjTCP1a|BjTCP1c|BjTCP1b|BjTCP1e|BjTCP1d|BjTCP3|BjTCP14b|BjTCP14a|BjTCP18b|BjTCP18c|BjTCP18a|BjTCP18d
shoot system development	Gene Ontology	GO:0048367	43	838	2.88825e-53	1.76103e-52	BjTCP15a|BjTCP15c|BjTCP15b|BjTCP15e|BjTCP13b|BjTCP13a|BjTCP15f|BjTCP2d|BjTCP2a|BjTCP2b|BjTCP2c|BjTCP5a|BjTCP5c|BjTCP5b|BjTCP17b|BjTCP17a|BjTCP9a|BjTCP24d|BjTCP9c|BjTCP9b|BjTCP24a|BjTCP9d|BjTCP24c|BjTCP24b|BjTCP20a|BjTCP13c|BjTCP20c|BjTCP20b|BjTCP12a|BjTCP12b|BjTCP15d|BjTCP1a|BjTCP1c|BjTCP1b|BjTCP1e|BjTCP1d|BjTCP3|BjTCP14b|BjTCP14a|BjTCP18b|BjTCP18c|BjTCP18a|BjTCP18d
system development	Gene Ontology	GO:0048731	43	1804	1.88503e-39	8.44415e-39	BjTCP15a|BjTCP15c|BjTCP15b|BjTCP15e|BjTCP13b|BjTCP13a|BjTCP15f|BjTCP2d|BjTCP2a|BjTCP2b|BjTCP2c|BjTCP5a|BjTCP5c|BjTCP5b|BjTCP17b|BjTCP17a|BjTCP9a|BjTCP24d|BjTCP9c|BjTCP9b|BjTCP24a|BjTCP9d|BjTCP24c|BjTCP24b|BjTCP20a|BjTCP13c|BjTCP20c|BjTCP20b|BjTCP12a|BjTCP12b|BjTCP15d|BjTCP1a|BjTCP1c|BjTCP1b|BjTCP1e|BjTCP1d|BjTCP3|BjTCP14b|BjTCP14a|BjTCP18b|BjTCP18c|BjTCP18a|BjTCP18d
regulation of developmental process	Gene Ontology	GO:0050793	32	649	1.817e-37	7.97662e-37	BjTCP13c|BjTCP13b|BjTCP13a|BjTCP2d|BjTCP2a|BjTCP2b|BjTCP2c|BjTCP5a|BjTCP5c|BjTCP5b|BjTCP17b|BjTCP17a|BjTCP9a|BjTCP24d|BjTCP9c|BjTCP9b|BjTCP24a|BjTCP9d|BjTCP24c|BjTCP24b|BjTCP20a|BjTCP20c|BjTCP20b|BjTCP12a|BjTCP12b|BjTCP3|BjTCP14b|BjTCP14a|BjTCP18b|BjTCP18c|BjTCP18a|BjTCP18d
anatomical structure morphogenesis	Gene Ontology	GO:0009653	26	858	9.47682e-25	2.88911e-24	BjTCP13c|BjTCP13b|BjTCP13a|BjTCP2d|BjTCP2a|BjTCP2b|BjTCP2c|BjTCP5a|BjTCP5c|BjTCP5b|BjTCP17b|BjTCP17a|BjTCP24d|BjTCP24a|BjTCP24c|BjTCP24b|BjTCP20a|BjTCP20c|BjTCP20b|BjTCP12a|BjTCP12b|BjTCP3|BjTCP18b|BjTCP18c|BjTCP18a|BjTCP18d
leaf development	Gene Ontology	GO:0048366	24	342	4.43601e-31	1.59624e-30	BjTCP13c|BjTCP13b|BjTCP13a|BjTCP2d|BjTCP2a|BjTCP2b|BjTCP2c|BjTCP5a|BjTCP5c|BjTCP5b|BjTCP17b|BjTCP17a|BjTCP9a|BjTCP24d|BjTCP9c|BjTCP9b|BjTCP24a|BjTCP9d|BjTCP24c|BjTCP24b|BjTCP20a|BjTCP20c|BjTCP20b|BjTCP3
phyllome development	Gene Ontology	GO:0048827	24	483	1.17258e-27	3.78502e-27	BjTCP13c|BjTCP13b|BjTCP13a|BjTCP2d|BjTCP2a|BjTCP2b|BjTCP2c|BjTCP5a|BjTCP5c|BjTCP5b|BjTCP17b|BjTCP17a|BjTCP9a|BjTCP24d|BjTCP9c|BjTCP9b|BjTCP24a|BjTCP9d|BjTCP24c|BjTCP24b|BjTCP20a|BjTCP20c|BjTCP20b|BjTCP3
plant organ development	Gene Ontology	GO:0099402	24	923	2.99612e-21	8.5409e-21	BjTCP13c|BjTCP13b|BjTCP13a|BjTCP2d|BjTCP2a|BjTCP2b|BjTCP2c|BjTCP5a|BjTCP5c|BjTCP5b|BjTCP17b|BjTCP17a|BjTCP9a|BjTCP24d|BjTCP9c|BjTCP9b|BjTCP24a|BjTCP9d|BjTCP24c|BjTCP24b|BjTCP20a|BjTCP20c|BjTCP20b|BjTCP3
shoot system morphogenesis	Gene Ontology	GO:0010016	23	179	1.98334e-35	8.21404e-35	BjTCP13c|BjTCP13b|BjTCP13a|BjTCP2d|BjTCP2a|BjTCP2b|BjTCP2c|BjTCP5a|BjTCP5c|BjTCP5b|BjTCP17b|BjTCP17a|BjTCP24d|BjTCP24a|BjTCP24c|BjTCP24b|BjTCP12a|BjTCP12b|BjTCP3|BjTCP18b|BjTCP18c|BjTCP18a|BjTCP18d
regulatory region nucleic acid binding	Gene Ontology	GO:0001067	21	781	8.14318e-19	2.07841e-18	BjTCP9a|BjTCP9c|BjTCP9b|BjTCP9d|BjTCP20b|BjTCP20a|BjTCP8b|BjTCP20c|BjTCP15b|BjTCP15e|BjTCP15d|BjTCP8a|BjTCP15f|BjTCP15a|BjTCP14b|BjTCP14a|BjTCP18b|BjTCP18c|BjTCP18a|BjTCP15c|BjTCP18d
transcription regulatory region DNA binding	Gene Ontology	GO:0044212	21	781	8.14318e-19	2.07841e-18	BjTCP9a|BjTCP9c|BjTCP9b|BjTCP9d|BjTCP20b|BjTCP20a|BjTCP8b|BjTCP20c|BjTCP15b|BjTCP15e|BjTCP15d|BjTCP8a|BjTCP15f|BjTCP15a|BjTCP14b|BjTCP14a|BjTCP18b|BjTCP18c|BjTCP18a|BjTCP15c|BjTCP18d
regulation of multicellular organismal development	Gene Ontology	GO:2000026	20	465	9.03168e-22	2.60849e-21	BjTCP9a|BjTCP9c|BjTCP9b|BjTCP9d|BjTCP20a|BjTCP20c|BjTCP20b|BjTCP12a|BjTCP3|BjTCP2a|BjTCP2d|BjTCP14b|BjTCP12b|BjTCP14a|BjTCP18b|BjTCP18c|BjTCP18a|BjTCP18d|BjTCP2b|BjTCP2c
regulation of multicellular organismal process	Gene Ontology	GO:0051239	20	513	5.82615e-21	1.63954e-20	BjTCP9a|BjTCP9c|BjTCP9b|BjTCP9d|BjTCP20a|BjTCP20c|BjTCP20b|BjTCP12a|BjTCP3|BjTCP2a|BjTCP2d|BjTCP14b|BjTCP12b|BjTCP14a|BjTCP18b|BjTCP18c|BjTCP18a|BjTCP18d|BjTCP2b|BjTCP2c
response to stimulus	Gene Ontology	GO:0050896	20	5510	0.00224485	0.00261404	BjTCP19|BjTCP15a|BjTCP5a|BjTCP15c|BjTCP15b|BjTCP15e|BjTCP13b|BjTCP5c|BjTCP5b|BjTCP15d|BjTCP14b|BjTCP3|BjTCP13a|BjTCP14a|BjTCP2d|BjTCP13c|BjTCP15f|BjTCP2a|BjTCP2b|BjTCP2c
cell differentiation	Gene Ontology	GO:0030154	17	659	5.72663e-15	1.33723e-14	BjTCP24d|BjTCP24a|BjTCP24c|BjTCP24b|BjTCP13c|BjTCP5a|BjTCP13b|BjTCP3|BjTCP5b|BjTCP17b|BjTCP17a|BjTCP5c|BjTCP13a|BjTCP2d|BjTCP2a|BjTCP2b|BjTCP2c
cellular developmental process	Gene Ontology	GO:0048869	17	863	4.05755e-13	9.08809e-13	BjTCP24d|BjTCP24a|BjTCP24c|BjTCP24b|BjTCP13c|BjTCP5a|BjTCP13b|BjTCP3|BjTCP5b|BjTCP17b|BjTCP17a|BjTCP5c|BjTCP13a|BjTCP2d|BjTCP2a|BjTCP2b|BjTCP2c
circadian rhythm	Gene Ontology	GO:0007623	17	120	8.29211e-27	2.63785e-26	BjTCP7c|BjTCP7b|BjTCP7a|BjTCP7e|BjTCP7d|BjTCP15a|BjTCP15c|BjTCP15b|BjTCP15e|BjTCP15d|BjTCP15f|BjTCP21f|BjTCP21d|BjTCP21e|BjTCP21b|BjTCP21c|BjTCP21a
leaf morphogenesis	Gene Ontology	GO:0009965	17	104	8.87987e-28	2.90915e-27	BjTCP24d|BjTCP24a|BjTCP24c|BjTCP24b|BjTCP13c|BjTCP5a|BjTCP13b|BjTCP3|BjTCP5b|BjTCP17b|BjTCP17a|BjTCP5c|BjTCP13a|BjTCP2d|BjTCP2a|BjTCP2b|BjTCP2c
negative regulation of biological process	Gene Ontology	GO:0048519	17	986	3.24708e-12	6.66106e-12	BjTCP9a|BjTCP24d|BjTCP9c|BjTCP9b|BjTCP24a|BjTCP9d|BjTCP24c|BjTCP24b|BjTCP20a|BjTCP20c|BjTCP20b|BjTCP21f|BjTCP21d|BjTCP21e|BjTCP21b|BjTCP21c|BjTCP21a
plant organ morphogenesis	Gene Ontology	GO:1905392	17	373	6.23472e-19	1.62919e-18	BjTCP24d|BjTCP24a|BjTCP24c|BjTCP24b|BjTCP13c|BjTCP5a|BjTCP13b|BjTCP3|BjTCP5b|BjTCP17b|BjTCP17a|BjTCP5c|BjTCP13a|BjTCP2d|BjTCP2a|BjTCP2b|BjTCP2c
post-embryonic development	Gene Ontology	GO:0009791	17	1503	1.99568e-09	3.63528e-09	BjTCP1d|BjTCP15a|BjTCP15c|BjTCP15b|BjTCP15e|BjTCP15d|BjTCP15f|BjTCP2d|BjTCP14b|BjTCP14a|BjTCP1a|BjTCP1c|BjTCP1b|BjTCP1e|BjTCP2a|BjTCP2b|BjTCP2c
regulation of development, heterochronic	Gene Ontology	GO:0040034	17	40	6.09952e-34	2.39079e-33	BjTCP24d|BjTCP24a|BjTCP24c|BjTCP24b|BjTCP13c|BjTCP5a|BjTCP13b|BjTCP3|BjTCP5b|BjTCP17b|BjTCP17a|BjTCP5c|BjTCP13a|BjTCP2d|BjTCP2a|BjTCP2b|BjTCP2c
rhythmic process	Gene Ontology	GO:0048511	17	127	2.02011e-26	6.33448e-26	BjTCP7c|BjTCP7b|BjTCP7a|BjTCP7e|BjTCP7d|BjTCP15a|BjTCP15c|BjTCP15b|BjTCP15e|BjTCP15d|BjTCP15f|BjTCP21f|BjTCP21d|BjTCP21e|BjTCP21b|BjTCP21c|BjTCP21a
aging	Gene Ontology	GO:0007568	16	160	5.31316e-23	1.55499e-22	BjTCP9a|BjTCP9c|BjTCP9b|BjTCP9d|BjTCP20a|BjTCP13c|BjTCP20c|BjTCP20b|BjTCP5a|BjTCP13b|BjTCP3|BjTCP5b|BjTCP17b|BjTCP17a|BjTCP5c|BjTCP13a
leaf senescence	Gene Ontology	GO:0010150	16	124	1.18676e-24	3.56841e-24	BjTCP9a|BjTCP9c|BjTCP9b|BjTCP9d|BjTCP20a|BjTCP13c|BjTCP20c|BjTCP20b|BjTCP5a|BjTCP13b|BjTCP3|BjTCP5b|BjTCP17b|BjTCP17a|BjTCP5c|BjTCP13a
plant organ senescence	Gene Ontology	GO:0090693	16	129	2.13388e-24	6.32955e-24	BjTCP9a|BjTCP9c|BjTCP9b|BjTCP9d|BjTCP20a|BjTCP13c|BjTCP20c|BjTCP20b|BjTCP5a|BjTCP13b|BjTCP3|BjTCP5b|BjTCP17b|BjTCP17a|BjTCP5c|BjTCP13a
aging	Gene Ontology Slim	GO:0007568	16	160	5.31316e-23	1.55499e-22	BjTCP9a|BjTCP9c|BjTCP9b|BjTCP9d|BjTCP20a|BjTCP13c|BjTCP20c|BjTCP20b|BjTCP5a|BjTCP13b|BjTCP3|BjTCP5b|BjTCP17b|BjTCP17a|BjTCP5c|BjTCP13a
positive regulation of biological process	Gene Ontology	GO:0048518	15	1151	3.31452e-09	5.84367e-09	BjTCP7c|BjTCP7b|BjTCP7a|BjTCP7e|BjTCP7d|BjTCP21f|BjTCP21d|BjTCP21e|BjTCP21b|BjTCP21c|BjTCP21a|BjTCP2d|BjTCP2a|BjTCP2b|BjTCP2c
regulation of shoot system development	Gene Ontology	GO:0048831	14	216	1.02703e-17	2.59119e-17	BjTCP9a|BjTCP9c|BjTCP9b|BjTCP9d|BjTCP20a|BjTCP20c|BjTCP20b|BjTCP12a|BjTCP3|BjTCP12b|BjTCP18b|BjTCP18c|BjTCP18a|BjTCP18d
developmental process involved in reproduction	Gene Ontology	GO:0003006	13	1410	2.11854e-06	3.00984e-06	BjTCP15a|BjTCP15c|BjTCP15b|BjTCP15e|BjTCP15d|BjTCP15f|BjTCP14b|BjTCP14a|BjTCP1a|BjTCP1c|BjTCP1b|BjTCP1e|BjTCP1d
regulation of biological quality	Gene Ontology	GO:0065008	13	1056	8.36448e-08	1.37528e-07	BjTCP9a|BjTCP9c|BjTCP9b|BjTCP9d|BjTCP20b|BjTCP20a|BjTCP20c|BjTCP15b|BjTCP15e|BjTCP15d|BjTCP15f|BjTCP15a|BjTCP15c
reproduction	Gene Ontology	GO:0000003	13	1695	1.52432e-05	2.04641e-05	BjTCP15a|BjTCP15c|BjTCP15b|BjTCP15e|BjTCP15d|BjTCP15f|BjTCP14b|BjTCP14a|BjTCP1a|BjTCP1c|BjTCP1b|BjTCP1e|BjTCP1d
reproductive process	Gene Ontology	GO:0022414	13	1686	1.44134e-05	1.94691e-05	BjTCP15a|BjTCP15c|BjTCP15b|BjTCP15e|BjTCP15d|BjTCP15f|BjTCP14b|BjTCP14a|BjTCP1a|BjTCP1c|BjTCP1b|BjTCP1e|BjTCP1d
reproductive shoot system development	Gene Ontology	GO:0090567	13	480	7.39214e-12	1.50238e-11	BjTCP15a|BjTCP15c|BjTCP15b|BjTCP15e|BjTCP15d|BjTCP15f|BjTCP14b|BjTCP14a|BjTCP1a|BjTCP1c|BjTCP1b|BjTCP1e|BjTCP1d
reproductive structure development	Gene Ontology	GO:0048608	13	1202	3.62074e-07	5.69715e-07	BjTCP15a|BjTCP15c|BjTCP15b|BjTCP15e|BjTCP15d|BjTCP15f|BjTCP14b|BjTCP14a|BjTCP1a|BjTCP1c|BjTCP1b|BjTCP1e|BjTCP1d
reproductive system development	Gene Ontology	GO:0061458	13	1203	3.65465e-07	5.70958e-07	BjTCP15a|BjTCP15c|BjTCP15b|BjTCP15e|BjTCP15d|BjTCP15f|BjTCP14b|BjTCP14a|BjTCP1a|BjTCP1c|BjTCP1b|BjTCP1e|BjTCP1d
flower development	Gene Ontology	GO:0009908	11	468	1.51715e-09	2.78673e-09	BjTCP15a|BjTCP15c|BjTCP15b|BjTCP15e|BjTCP15d|BjTCP15f|BjTCP1a|BjTCP1c|BjTCP1b|BjTCP1e|BjTCP1d
regulation of circadian rhythm	Gene Ontology	GO:0042752	11	43	3.93266e-20	1.07902e-19	BjTCP7c|BjTCP7b|BjTCP7a|BjTCP7e|BjTCP7d|BjTCP21f|BjTCP21d|BjTCP21e|BjTCP21b|BjTCP21c|BjTCP21a
regulation of response to stimulus	Gene Ontology	GO:0048583	10	631	3.30969e-07	5.24532e-07	BjTCP19|BjTCP13c|BjTCP13b|BjTCP13a|BjTCP14b|BjTCP14a|BjTCP2d|BjTCP2a|BjTCP2b|BjTCP2c
positive regulation of biosynthetic process	Gene Ontology	GO:0009891	9	566	1.32018e-06	1.88781e-06	BjTCP7c|BjTCP7b|BjTCP7a|BjTCP7e|BjTCP7d|BjTCP2d|BjTCP2a|BjTCP2b|BjTCP2c
positive regulation of cellular biosynthetic process	Gene Ontology	GO:0031328	9	554	1.10984e-06	1.60799e-06	BjTCP7c|BjTCP7b|BjTCP7a|BjTCP7e|BjTCP7d|BjTCP2d|BjTCP2a|BjTCP2b|BjTCP2c
positive regulation of cellular metabolic process	Gene Ontology	GO:0031325	9	737	1.08511e-05	1.484e-05	BjTCP7c|BjTCP7b|BjTCP7a|BjTCP7e|BjTCP7d|BjTCP2d|BjTCP2a|BjTCP2b|BjTCP2c
positive regulation of cellular process	Gene Ontology	GO:0048522	9	914	5.73569e-05	7.29846e-05	BjTCP7c|BjTCP7b|BjTCP7a|BjTCP7e|BjTCP7d|BjTCP2d|BjTCP2a|BjTCP2b|BjTCP2c
positive regulation of macromolecule biosynthetic process	Gene Ontology	GO:0010557	9	529	7.62697e-07	1.1506e-06	BjTCP7c|BjTCP7b|BjTCP7a|BjTCP7e|BjTCP7d|BjTCP2d|BjTCP2a|BjTCP2b|BjTCP2c
positive regulation of macromolecule metabolic process	Gene Ontology	GO:0010604	9	720	9.03092e-06	1.24281e-05	BjTCP7c|BjTCP7b|BjTCP7a|BjTCP7e|BjTCP7d|BjTCP2d|BjTCP2a|BjTCP2b|BjTCP2c
positive regulation of metabolic process	Gene Ontology	GO:0009893	9	786	1.7953e-05	2.39555e-05	BjTCP7c|BjTCP7b|BjTCP7a|BjTCP7e|BjTCP7d|BjTCP2d|BjTCP2a|BjTCP2b|BjTCP2c
positive regulation of nitrogen compound metabolic process	Gene Ontology	GO:0051173	9	698	7.06853e-06	9.78891e-06	BjTCP7c|BjTCP7b|BjTCP7a|BjTCP7e|BjTCP7d|BjTCP2d|BjTCP2a|BjTCP2b|BjTCP2c
positive regulation of nucleic acid-templated transcription	Gene Ontology	GO:1903508	9	496	4.50853e-07	6.94472e-07	BjTCP7c|BjTCP7b|BjTCP7a|BjTCP7e|BjTCP7d|BjTCP2d|BjTCP2a|BjTCP2b|BjTCP2c
positive regulation of nucleobase-containing compound metabolic process	Gene Ontology	GO:0045935	9	530	7.74511e-07	1.16044e-06	BjTCP7c|BjTCP7b|BjTCP7a|BjTCP7e|BjTCP7d|BjTCP2d|BjTCP2a|BjTCP2b|BjTCP2c
positive regulation of RNA biosynthetic process	Gene Ontology	GO:1902680	9	496	4.50853e-07	6.94472e-07	BjTCP7c|BjTCP7b|BjTCP7a|BjTCP7e|BjTCP7d|BjTCP2d|BjTCP2a|BjTCP2b|BjTCP2c
positive regulation of RNA metabolic process	Gene Ontology	GO:0051254	9	512	5.84417e-07	8.87747e-07	BjTCP7c|BjTCP7b|BjTCP7a|BjTCP7e|BjTCP7d|BjTCP2d|BjTCP2a|BjTCP2b|BjTCP2c
response to chemical	Gene Ontology	GO:0042221	9	2743	0.0734462	0.0784498	BjTCP15a|BjTCP15c|BjTCP15b|BjTCP15e|BjTCP15d|BjTCP3|BjTCP15f|BjTCP14b|BjTCP14a
response to endogenous stimulus	Gene Ontology	GO:0009719	9	1475	0.00182651	0.00216129	BjTCP15a|BjTCP15c|BjTCP15b|BjTCP15e|BjTCP15d|BjTCP3|BjTCP15f|BjTCP14b|BjTCP14a
response to hormone	Gene Ontology	GO:0009725	9	1461	0.00171182	0.00203656	BjTCP15a|BjTCP15c|BjTCP15b|BjTCP15e|BjTCP15d|BjTCP3|BjTCP15f|BjTCP14b|BjTCP14a
response to organic substance	Gene Ontology	GO:0010033	9	1760	0.00584696	0.00673705	BjTCP15a|BjTCP15c|BjTCP15b|BjTCP15e|BjTCP15d|BjTCP3|BjTCP15f|BjTCP14b|BjTCP14a
response to stress	Gene Ontology	GO:0006950	9	3196	0.148812	0.156663	BjTCP19|BjTCP5a|BjTCP13c|BjTCP13b|BjTCP13a|BjTCP5b|BjTCP14b|BjTCP5c|BjTCP14a
inflorescence development	Gene Ontology	GO:0010229	8	24	1.04641e-15	2.52402e-15	BjTCP15a|BjTCP15c|BjTCP15b|BjTCP15e|BjTCP15d|BjTCP15f|BjTCP14b|BjTCP14a
response to cytokinin	Gene Ontology	GO:0009735	8	95	2.13127e-11	4.25286e-11	BjTCP15a|BjTCP15c|BjTCP15b|BjTCP15e|BjTCP15d|BjTCP15f|BjTCP14b|BjTCP14a
anatomical structure formation involved in morphogenesis	Gene Ontology	GO:0048646	7	192	1.01942e-07	1.66367e-07	BjTCP12a|BjTCP12b|BjTCP3|BjTCP18b|BjTCP18c|BjTCP18a|BjTCP18d
cellular component organization	Gene Ontology	GO:0016043	7	2514	0.198136	0.207594	BjTCP9a|BjTCP9c|BjTCP9b|BjTCP9d|BjTCP20a|BjTCP20c|BjTCP20b
cellular component organization or biogenesis	Gene Ontology	GO:0071840	7	2787	0.275987	0.285811	BjTCP9a|BjTCP9c|BjTCP9b|BjTCP9d|BjTCP20a|BjTCP20c|BjTCP20b
cytoplasm	Gene Ontology	GO:0005737	7	12053	0.999999	0.999999	BjTCP9a|BjTCP9c|BjTCP9b|BjTCP9d|BjTCP13c|BjTCP13b|BjTCP13a
morphogenesis of a branching structure	Gene Ontology	GO:0001763	7	35	1.57212e-12	3.25548e-12	BjTCP12a|BjTCP12b|BjTCP3|BjTCP18b|BjTCP18c|BjTCP18a|BjTCP18d
negative regulation of developmental process	Gene Ontology	GO:0051093	7	124	5.70527e-09	9.89965e-09	BjTCP9a|BjTCP9c|BjTCP9b|BjTCP9d|BjTCP20a|BjTCP20c|BjTCP20b
negative regulation of leaf development	Gene Ontology	GO:1905622	7	9	6.92638e-16	1.68927e-15	BjTCP9a|BjTCP9c|BjTCP9b|BjTCP9d|BjTCP20a|BjTCP20c|BjTCP20b
negative regulation of leaf senescence	Gene Ontology	GO:1900056	7	9	6.92638e-16	1.68927e-15	BjTCP9a|BjTCP9c|BjTCP9b|BjTCP9d|BjTCP20a|BjTCP20c|BjTCP20b
negative regulation of multicellular organismal process	Gene Ontology	GO:0051241	7	113	3.09074e-09	5.49327e-09	BjTCP9a|BjTCP9c|BjTCP9b|BjTCP9d|BjTCP20a|BjTCP20c|BjTCP20b
plant organ formation	Gene Ontology	GO:1905393	7	111	2.74732e-09	4.92275e-09	BjTCP12a|BjTCP12b|BjTCP3|BjTCP18b|BjTCP18c|BjTCP18a|BjTCP18d
regulation of anatomical structure morphogenesis	Gene Ontology	GO:0022603	7	149	1.9177e-08	3.22556e-08	BjTCP12a|BjTCP12b|BjTCP3|BjTCP18b|BjTCP18c|BjTCP18a|BjTCP18d
regulation of anatomical structure size	Gene Ontology	GO:0090066	7	67	1.00046e-10	1.89311e-10	BjTCP9a|BjTCP9c|BjTCP9b|BjTCP9d|BjTCP20a|BjTCP20c|BjTCP20b
regulation of cell size	Gene Ontology	GO:0008361	7	25	1.99047e-13	4.55113e-13	BjTCP9a|BjTCP9c|BjTCP9b|BjTCP9d|BjTCP20a|BjTCP20c|BjTCP20b
regulation of cellular component size	Gene Ontology	GO:0032535	7	67	1.00046e-10	1.89311e-10	BjTCP9a|BjTCP9c|BjTCP9b|BjTCP9d|BjTCP20a|BjTCP20c|BjTCP20b
regulation of leaf development	Gene Ontology	GO:2000024	7	64	7.4261e-11	1.42985e-10	BjTCP9a|BjTCP9c|BjTCP9b|BjTCP9d|BjTCP20a|BjTCP20c|BjTCP20b
regulation of leaf senescence	Gene Ontology	GO:1900055	7	32	9.00266e-13	1.90008e-12	BjTCP9a|BjTCP9c|BjTCP9b|BjTCP9d|BjTCP20a|BjTCP20c|BjTCP20b
regulation of morphogenesis of a branching structure	Gene Ontology	GO:0060688	7	11	1.92113e-15	4.53429e-15	BjTCP12a|BjTCP12b|BjTCP3|BjTCP18b|BjTCP18c|BjTCP18a|BjTCP18d
regulation of plant organ formation	Gene Ontology	GO:1905428	7	15	1.02349e-14	2.3648e-14	BjTCP12a|BjTCP12b|BjTCP3|BjTCP18b|BjTCP18c|BjTCP18a|BjTCP18d
regulation of secondary shoot formation	Gene Ontology	GO:2000032	7	11	1.92113e-15	4.53429e-15	BjTCP12a|BjTCP12b|BjTCP3|BjTCP18b|BjTCP18c|BjTCP18a|BjTCP18d
regulation of shoot system morphogenesis	Gene Ontology	GO:1900618	7	30	6.04383e-13	1.31349e-12	BjTCP12a|BjTCP12b|BjTCP3|BjTCP18b|BjTCP18c|BjTCP18a|BjTCP18d
response to abiotic stimulus	Gene Ontology	GO:0009628	7	1981	0.0808612	0.0859517	BjTCP5a|BjTCP5c|BjTCP5b|BjTCP2d|BjTCP2a|BjTCP2b|BjTCP2c
secondary shoot formation	Gene Ontology	GO:0010223	7	32	9.00266e-13	1.90008e-12	BjTCP12a|BjTCP12b|BjTCP3|BjTCP18b|BjTCP18c|BjTCP18a|BjTCP18d
shoot axis formation	Gene Ontology	GO:0010346	7	32	9.00266e-13	1.90008e-12	BjTCP12a|BjTCP12b|BjTCP3|BjTCP18b|BjTCP18c|BjTCP18a|BjTCP18d
anthocyanin-containing compound biosynthetic process	Gene Ontology	GO:0009718	6	29	5.58068e-11	1.09371e-10	BjTCP15a|BjTCP15c|BjTCP15b|BjTCP15e|BjTCP15d|BjTCP15f
anthocyanin-containing compound metabolic process	Gene Ontology	GO:0046283	6	42	4.13945e-10	7.73285e-10	BjTCP15a|BjTCP15c|BjTCP15b|BjTCP15e|BjTCP15d|BjTCP15f
auxin homeostasis	Gene Ontology	GO:0010252	6	30	6.687e-11	1.29893e-10	BjTCP15a|BjTCP15c|BjTCP15b|BjTCP15e|BjTCP15d|BjTCP15f
cell cycle	Gene Ontology	GO:0007049	6	500	0.000390282	0.000477253	BjTCP15a|BjTCP15c|BjTCP15b|BjTCP15e|BjTCP15d|BjTCP15f
cell cycle DNA replication	Gene Ontology	GO:0044786	6	59	2.71764e-09	4.90964e-09	BjTCP15a|BjTCP15c|BjTCP15b|BjTCP15e|BjTCP15d|BjTCP15f
cell cycle process	Gene Ontology	GO:0022402	6	370	7.865e-05	9.78113e-05	BjTCP15a|BjTCP15c|BjTCP15b|BjTCP15e|BjTCP15d|BjTCP15f
cell division	Gene Ontology	GO:0051301	6	347	5.55522e-05	7.11003e-05	BjTCP15a|BjTCP15c|BjTCP15b|BjTCP15e|BjTCP15d|BjTCP15f
chemical homeostasis	Gene Ontology	GO:0048878	6	375	8.45616e-05	0.000104571	BjTCP15a|BjTCP15c|BjTCP15b|BjTCP15e|BjTCP15d|BjTCP15f
defense response	Gene Ontology	GO:0006952	6	1361	0.0442597	0.0477396	BjTCP19|BjTCP13c|BjTCP13b|BjTCP13a|BjTCP14b|BjTCP14a
DNA endoreduplication	Gene Ontology	GO:0042023	6	49	9.67898e-10	1.79286e-09	BjTCP15a|BjTCP15c|BjTCP15b|BjTCP15e|BjTCP15d|BjTCP15f
DNA replication	Gene Ontology	GO:0006260	6	138	3.26533e-07	5.21265e-07	BjTCP15a|BjTCP15c|BjTCP15b|BjTCP15e|BjTCP15d|BjTCP15f
DNA-dependent DNA replication	Gene Ontology	GO:0006261	6	113	1.0548e-07	1.7087e-07	BjTCP15a|BjTCP15c|BjTCP15b|BjTCP15e|BjTCP15d|BjTCP15f
flavonoid biosynthetic process	Gene Ontology	GO:0009813	6	71	7.66469e-09	1.31953e-08	BjTCP15a|BjTCP15c|BjTCP15b|BjTCP15e|BjTCP15d|BjTCP15f
flavonoid metabolic process	Gene Ontology	GO:0009812	6	86	2.25503e-08	3.7641e-08	BjTCP15a|BjTCP15c|BjTCP15b|BjTCP15e|BjTCP15d|BjTCP15f
floral whorl development	Gene Ontology	GO:0048438	6	171	1.09451e-06	1.59631e-06	BjTCP15a|BjTCP15c|BjTCP15b|BjTCP15e|BjTCP15d|BjTCP15f
gynoecium development	Gene Ontology	GO:0048467	6	76	1.12372e-08	1.91951e-08	BjTCP15a|BjTCP15c|BjTCP15b|BjTCP15e|BjTCP15d|BjTCP15f
homeostatic process	Gene Ontology	GO:0042592	6	543	0.000599282	0.000728767	BjTCP15a|BjTCP15c|BjTCP15b|BjTCP15e|BjTCP15d|BjTCP15f
negative regulation of molecular function	Gene Ontology	GO:0044092	6	235	6.49685e-06	9.05435e-06	BjTCP21f|BjTCP21d|BjTCP21e|BjTCP21b|BjTCP21c|BjTCP21a
pigment biosynthetic process	Gene Ontology	GO:0046148	6	137	3.13386e-07	5.03944e-07	BjTCP15a|BjTCP15c|BjTCP15b|BjTCP15e|BjTCP15d|BjTCP15f
pigment metabolic process	Gene Ontology	GO:0042440	6	165	8.95066e-07	1.31416e-06	BjTCP15a|BjTCP15c|BjTCP15b|BjTCP15e|BjTCP15d|BjTCP15f
positive regulation of circadian rhythm	Gene Ontology	GO:0042753	6	11	4.3689e-13	9.58974e-13	BjTCP21f|BjTCP21d|BjTCP21e|BjTCP21b|BjTCP21c|BjTCP21a
regulation of anthocyanin biosynthetic process	Gene Ontology	GO:0031540	6	14	1.36227e-12	2.8478e-12	BjTCP15a|BjTCP15c|BjTCP15b|BjTCP15e|BjTCP15d|BjTCP15f
regulation of anthocyanin metabolic process	Gene Ontology	GO:0031537	6	22	1.30866e-11	2.63533e-11	BjTCP15a|BjTCP15c|BjTCP15b|BjTCP15e|BjTCP15d|BjTCP15f
regulation of defense response	Gene Ontology	GO:0031347	6	233	6.19485e-06	8.7445e-06	BjTCP19|BjTCP13c|BjTCP13b|BjTCP13a|BjTCP14b|BjTCP14a
regulation of DNA-binding transcription factor activity	Gene Ontology	GO:0051090	6	11	4.3689e-13	9.58974e-13	BjTCP21f|BjTCP21d|BjTCP21e|BjTCP21b|BjTCP21c|BjTCP21a
regulation of flavonoid biosynthetic process	Gene Ontology	GO:0009962	6	25	2.54635e-11	5.03534e-11	BjTCP15a|BjTCP15c|BjTCP15b|BjTCP15e|BjTCP15d|BjTCP15f
regulation of molecular function	Gene Ontology	GO:0065009	6	619	0.00117144	0.00140126	BjTCP21f|BjTCP21d|BjTCP21e|BjTCP21b|BjTCP21c|BjTCP21a
regulation of post-embryonic development	Gene Ontology	GO:0048580	6	331	4.29655e-05	5.56396e-05	BjTCP14b|BjTCP14a|BjTCP2d|BjTCP2a|BjTCP2b|BjTCP2c
regulation of response to stress	Gene Ontology	GO:0080134	6	333	4.43999e-05	5.716e-05	BjTCP19|BjTCP13c|BjTCP13b|BjTCP13a|BjTCP14b|BjTCP14a
cis-regulatory region binding	Gene Ontology	GO:0035326	5	86	8.46082e-07	1.25061e-06	BjTCP20a|BjTCP20c|BjTCP20b|BjTCP8b|BjTCP8a
cis-regulatory region sequence-specific DNA binding	Gene Ontology	GO:0000987	5	86	8.46082e-07	1.25061e-06	BjTCP20a|BjTCP20c|BjTCP20b|BjTCP8b|BjTCP8a
DNA-binding transcription activator activity	Gene Ontology	GO:0001216	5	35	1.28905e-08	2.18491e-08	BjTCP7c|BjTCP7b|BjTCP7a|BjTCP7e|BjTCP7d
double-stranded DNA binding	Gene Ontology	GO:0003690	5	304	0.000301602	0.000370878	BjTCP20a|BjTCP20c|BjTCP20b|BjTCP8b|BjTCP8a
positive regulation of gene expression	Gene Ontology	GO:0010628	5	535	0.00357445	0.00414032	BjTCP7c|BjTCP7b|BjTCP7a|BjTCP7e|BjTCP7d
positive regulation of transcription, DNA-templated	Gene Ontology	GO:0045893	5	478	0.00221613	0.00259435	BjTCP7c|BjTCP7b|BjTCP7a|BjTCP7e|BjTCP7d
sequence-specific double-stranded DNA binding	Gene Ontology	GO:1990837	5	223	7.32981e-05	9.22001e-05	BjTCP20a|BjTCP20c|BjTCP20b|BjTCP8b|BjTCP8a
transcription regulatory region sequence-specific DNA binding	Gene Ontology	GO:0000976	5	172	2.19662e-05	2.89585e-05	BjTCP20a|BjTCP20c|BjTCP20b|BjTCP8b|BjTCP8a
cell population proliferation	Gene Ontology	GO:0008283	4	71	1.27915e-05	1.73854e-05	BjTCP24d|BjTCP24a|BjTCP24c|BjTCP24b
negative regulation of cell population proliferation	Gene Ontology	GO:0008285	4	16	5.51184e-08	9.13094e-08	BjTCP24d|BjTCP24a|BjTCP24c|BjTCP24b
negative regulation of cellular process	Gene Ontology	GO:0048523	4	667	0.0383095	0.0419398	BjTCP24d|BjTCP24a|BjTCP24c|BjTCP24b
photomorphogenesis	Gene Ontology	GO:0009640	4	88	2.87075e-05	3.76197e-05	BjTCP2d|BjTCP2a|BjTCP2b|BjTCP2c
positive regulation of developmental process	Gene Ontology	GO:0051094	4	114	7.59983e-05	9.5052e-05	BjTCP2d|BjTCP2a|BjTCP2b|BjTCP2c
positive regulation of multicellular organismal process	Gene Ontology	GO:0051240	4	107	5.99018e-05	7.57836e-05	BjTCP2d|BjTCP2a|BjTCP2b|BjTCP2c
positive regulation of photomorphogenesis	Gene Ontology	GO:2000306	4	7	3.80239e-09	6.6504e-09	BjTCP2d|BjTCP2a|BjTCP2b|BjTCP2c
positive regulation of post-embryonic development	Gene Ontology	GO:0048582	4	80	2.00495e-05	2.65913e-05	BjTCP2d|BjTCP2a|BjTCP2b|BjTCP2c
positive regulation of response to stimulus	Gene Ontology	GO:0048584	4	227	0.000976184	0.0011741	BjTCP2d|BjTCP2a|BjTCP2b|BjTCP2c
regulation of cell population proliferation	Gene Ontology	GO:0042127	4	59	6.37617e-06	8.94294e-06	BjTCP24d|BjTCP24a|BjTCP24c|BjTCP24b
regulation of photomorphogenesis	Gene Ontology	GO:0010099	4	30	5.17228e-07	7.91161e-07	BjTCP2d|BjTCP2a|BjTCP2b|BjTCP2c
regulation of response to red or far red light	Gene Ontology	GO:2000030	4	37	1.11831e-06	1.60964e-06	BjTCP2d|BjTCP2a|BjTCP2b|BjTCP2c
response to blue light	Gene Ontology	GO:0009637	4	91	3.25698e-05	4.24277e-05	BjTCP2d|BjTCP2a|BjTCP2b|BjTCP2c
response to light stimulus	Gene Ontology	GO:0009416	4	670	0.0388399	0.0423095	BjTCP2d|BjTCP2a|BjTCP2b|BjTCP2c
response to radiation	Gene Ontology	GO:0009314	4	692	0.0428592	0.0464573	BjTCP2d|BjTCP2a|BjTCP2b|BjTCP2c
response to red or far red light	Gene Ontology	GO:0009639	4	213	0.000773997	0.000936046	BjTCP2d|BjTCP2a|BjTCP2b|BjTCP2c
root development	Gene Ontology	GO:0048364	4	455	0.0112049	0.0126451	BjTCP9a|BjTCP9c|BjTCP9b|BjTCP9d
root system development	Gene Ontology	GO:0022622	4	456	0.0112875	0.0126731	BjTCP9a|BjTCP9c|BjTCP9b|BjTCP9d
chloroplast	Gene Ontology	GO:0009507	3	4164	0.98917	0.998266	BjTCP13c|BjTCP13b|BjTCP13a
plastid	Gene Ontology	GO:0009536	3	4526	0.994168	0.998718	BjTCP13c|BjTCP13b|BjTCP13a
response to heat	Gene Ontology	GO:0009408	3	206	0.007347	0.00842124	BjTCP5a|BjTCP5c|BjTCP5b
response to temperature stimulus	Gene Ontology	GO:0009266	3	562	0.0917525	0.0970587	BjTCP5a|BjTCP5c|BjTCP5b
regulation of seed germination	Gene Ontology	GO:0010029	2	77	0.00989205	0.0112795	BjTCP14b|BjTCP14a
regulation of seedling development	Gene Ontology	GO:1900140	2	80	0.010624	0.0120515	BjTCP14b|BjTCP14a
response to abscisic acid	Gene Ontology	GO:0009737	2	542	0.275291	0.285811	BjTCP14b|BjTCP14a
response to acid chemical	Gene Ontology	GO:0001101	2	1161	0.651373	0.663464	BjTCP14b|BjTCP14a
response to alcohol	Gene Ontology	GO:0097305	2	544	0.276696	0.285811	BjTCP14b|BjTCP14a
response to gibberellin	Gene Ontology	GO:0009739	2	149	0.0333419	0.0368692	BjTCP14b|BjTCP14a
response to lipid	Gene Ontology	GO:0033993	2	737	0.409494	0.421002	BjTCP14b|BjTCP14a
response to oxygen-containing compound	Gene Ontology	GO:1901700	2	1504	0.78486	0.795735	BjTCP14b|BjTCP14a
RNA polymerase II cis-regulatory region sequence-specific DNA binding	Gene Ontology	GO:0000978	2	33	0.0020151	0.00237166	BjTCP8b|BjTCP8a
RNA polymerase II regulatory region DNA binding	Gene Ontology	GO:0001012	2	139	0.0294086	0.0326845	BjTCP8b|BjTCP8a
RNA polymerase II regulatory region sequence-specific DNA binding	Gene Ontology	GO:0000977	2	139	0.0294086	0.0326845	BjTCP8b|BjTCP8a
seed germination	Gene Ontology	GO:0009845	2	154	0.0353817	0.0389287	BjTCP14b|BjTCP14a
seedling development	Gene Ontology	GO:0090351	2	179	0.0462701	0.0496639	BjTCP14b|BjTCP14a
response to auxin	Gene Ontology	GO:0009733	1	367	0.504025	0.515774	BjTCP3
