# Supplementary material for: Genome-wide identification and characterization of TCP family genes in Brassica juncea var. tumida
Source: PeerJ. 2020 May 14;8:e9130. doi: 10.7717/peerj.9130 (PMC7231505; doi:10.7717/peerj.9130)
Supplement: Table S3 — The yellow background colour showed the GA response cis-acting elements, Gray background showed the SA response cis-acting elements. The Red colour gene name mean detected expression by qRT-PCR. [file peerj-08-9130-s006.xlsx]

## Sheet: cis-action
	homore
	ABA	IAA		MeJA		ET	GA			SA	light										meristem	circadian	low-temperature	drought	stress	stress	stress	defense and stress	stress	anaerobic	wound	other
	ABRE	AuxRP-core	TGA-element	CGTCA-motif	TGACG-motif	ERE	GARE-motif	P-box	TATC-box	TCA-element	3-AF1 binding site	ACE	AE-box	TCT-motif	ATC-motif	Box 4	GATA-motif	G-Box	GT1-motif	I-box	CAT-box	circadian	LTR	MBS	Myb	Myc	STRE	TC-rich repeats	W box	ARE	WUN-motif	AAGAA-motif	F-box	as-1
BjTCP1a			1	2	2	2				2			1			4	1		1	2	1		1	1	8	2	1			1				2
BjTCP1b			2	2	2	4	1					1	1	1		1				1					9		1			2	2	3		2
BjTCP1c			2	1	1	1	2						1			1	1		4					1	9	1				2	2	1		1
BjTCP1d	2		2			2							2			1	1	3	6					2	6	5	5		3	1		2
BjTCP5a		1	2	2	2	2		1		1				3		6		1	5			1	1	2	10	7	1	2	1	2		1		2
BjTCP5b		1		1	1	1	2			2					1	1			1		2	1	1		6	3				1		1		1
BjTCP5c		1				2	1			1			1	1		4			2		1			1	5	4		2	1	2		3
BjTCP7a	5			2	2	1								3				6			2			2	3	3	1		1	1		3		2
BjTCP7b	3					2			1							4		4	4				4	1	4	5	2		1	2	1
BjTCP7c	1			1	1			2	1					1		3	1	2	1	1			3		7	3	1		1	3				1
BjTCP7d	4		1	2	2	1							2			3	1	7			1		2		1	5	1	1	1		1	1		2
BjTCP7e	9			5	5	1								1		2		10	1	1				3	8	6	1		1	4		1		5
BjTCP8a	3			3	3	3					1			1		4		2	3			1	2		3		1	1		4		1		3
BjTCP8b				1	1	3		1		1				2		4			1			1	1			2	3	1	1	2		2		1
BjTCP9a	5	1		2	2		1			1				1			1	6	4	1		1			4	3	1	1		2	1	2		2
BjTCP9b	5		1	1	1				1	1			1	2			2	6	5	2	1				4	7	2				2			1
BjTCP9c	4		2	3	3		3				1			1			3	4		3	1		1		6	2		1	1	1		1		3
BjTCP9d	5	1	1	3	4					1			1	3		2	3	6	5	3					3	4	2			3	1			4
BjTCP12a	5									3	1		1	2		3	3	6	2	2		1		1	7	2	3	1	1	4	1	2
BjTCP12b	5					3				4			1	1	2	5	4	6	2	3		1		1	8	2	1	2		1		2
BjTCP13a	2					3		2		8			1	1	1	2	4	1	1						7	4		2		2
BjTCP13b	9		3	3	3	7				7						1		10		1			1		3	4				1	2		1	3
BjTCP13c	3			1	1	3	1	1		3						4	2	3		1		1			6	1	2		1	1		1		1
BjTCP14a	5		1	6	6					1	1		1			5		7							3	9	1		3	4	2	1		6
BjTCP14b								1	1		1		1					1						1	3					1
BjTCP15a	2		1			4	2			2	1					4		3	1				1		1	4		1	1	4		1
BjTCP15b	3		2	1	1	1				4		1	1		1	3	1	2	1	1					10	9	1			4		2		1
BjTCP15c	6		2	1	1	1	1	1		3		1		1		6		3	1		2	1		1	4	4				4		1		1
BjTCP15d	3		1	3	3	1				2				2		3	1	3	2		2			1	6	2				5		1	1	3
BjTCP15e	4		1	1	1	1		1	2	6		3	1			8	1	2	1			1		1	4	6				4		2		1
BjTCP15f	5		3	1	1	4				3	1					2	1	4		1	1				5					7	1			1
BjTCP17a	3	2	2	2	2			1					1	1		2	1	3	2					2	6	5		1		1	1	4		2
BjTCP17b	2	1	1	1	1		1			2				2		4	3	2	3		1			1	5	1	2			3		2		1
BjTCP18a				1	1	3		2		1		1			1		2			2					3	5	1					3		1
BjTCP18b				1	1	2		1		2					1	5	4		5			2	1		6	1			1			2		1
BjTCP18c				3	3			1		1					1	2			3						6	3				1	1	2		3
BjTCP18d				1	1	3			1	3		1		1	1	4	2		2						8	2		1		2	1	2		1
BjTCP19		1				1	1			1	1		1			3	1		2		2		1		6	5	2			2	1
BjTCP20a	1	1											2			4		2	3		1		1		6	1			2	2		3	1
BjTCP20b	2	1	1			2				1	1			1		5		3	1	1				2	5	5	1			1		1
BjTCP20c	5					1				1			1	1		4		4	2	1					10	5		1	2	5		1
BjTCP21a	2		1	4	4	3			1	1						4	1	2		2	1				6	7			1	1		1	1	4
BjTCP21b	1		2			2	2					1				3		1	3				2		7	2	1		1	4		6
BjTCP21c		1	1	1	1	1				1	1	1				2	1	2				1	3		7	5	2			2	1		1	1
BjTCP21d	2					5						1		1		7	3	1					4		4	4	1				3	3
BjTCP21e	2		1	2	2		1	1					1	1			1	3	1	1					10	9	1		2	1		2		2
BjTCP21f	1		2	1	1	1								1		3		2	1				1		3	8	3	1	1				1	1
BjTCP22a	2									3		1	1			10	1	4	2						4	3	1	2		3	1	3
BjTCP22b	1		1	1	1	7	1			2		1		2		4		1	1	2					3	4			1	4				1
BjTCP22c						8							1			6			1	1				1	5	5	1	1	1			1
BjTCP22d	1			1	1	6				1						2	1	1	1	2					3	4	1	1	1					1
BjTCP24a			1			1			1	1			2	1		1			1	1				2	4	1	1	1	1	2		2
BjTCP24b			1			2				2			1			6								2	4	3		1	2	1	1	5
BjTCP24c				1	1			1		4				2		2				1				2	2	4	2	2				3	1	1
